# Supplementary material for: Bioinformatics Analysis of Global Proteomic and Phosphoproteomic Data Sets Revealed Activation of NEK2 and AURKA in Cancers
Source: PubMed Central journal article supplement (PMC7072708; doi:10.3390/biom10020237), 2020-02-04
Supplement: biomolecules-10-00237-s001.pdf [file biomolecules-10-00237-s001.pdf]

# **Bioinformatics Analysis of Global Proteomic and Phosphoproteomic Data Sets Revealed Activation of NEK2 and AURKA in Cancers**

**Barnali Deb <sup>1,2,+</sup>, Pratyay Sengupta <sup>3,+</sup>, Janani Sambath <sup>1</sup> and Prashant Kumar <sup>1,2,\*</sup>**

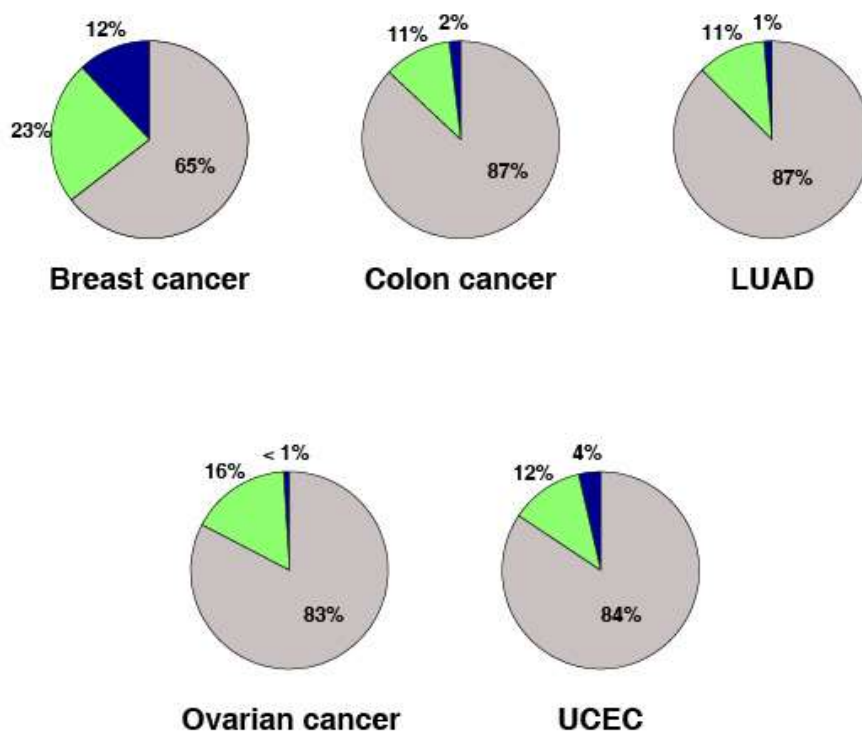

**Figure S1:** The percentage of phosphosites identified across 5 cancer types (breast cancer, colon cancer, LUAD, ovarian cancer and UCEC). Grey, green and blue represent the percentage of serine, threonine and tyrosine sites respectively.

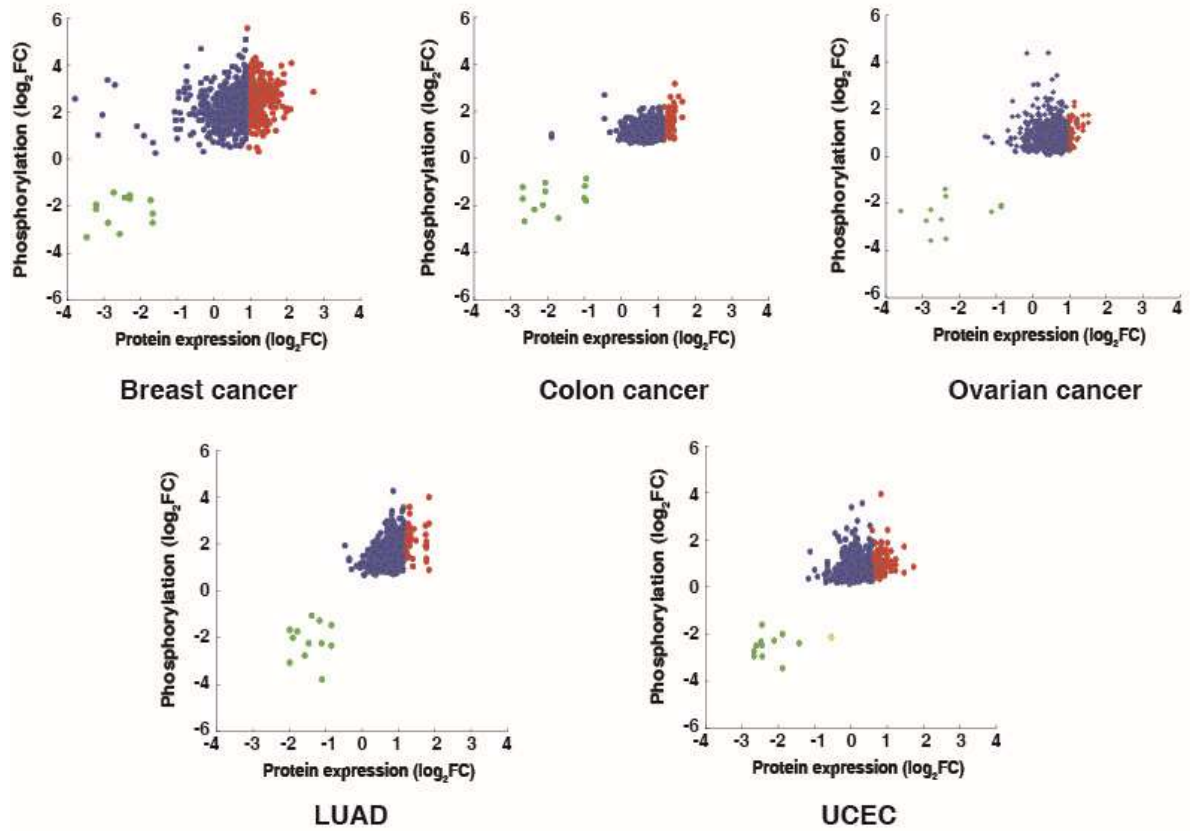

**Figure S2:** Quadrant plot representing the dysregulated phosphopeptides across 5 cancer types and their corresponding protein expressions.

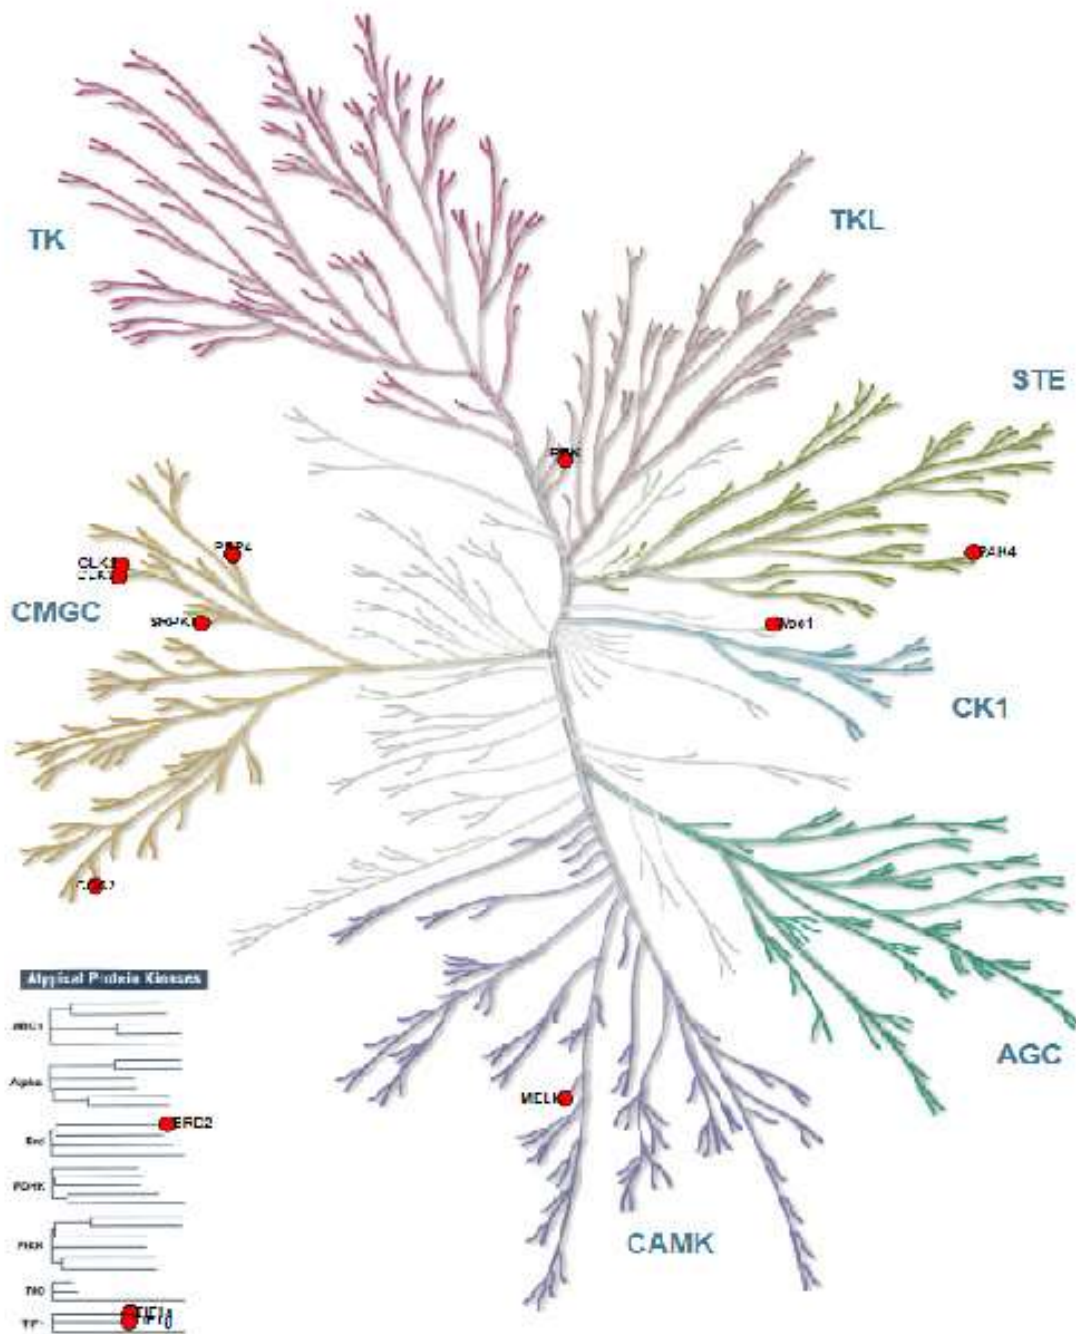

"Illustration reproduced courtesy of Cell Signaling Technology, Inc. ([www.cellsignal.com](http://www.cellsignal.com))"

**Figure S3:** Kinome map depicting the identified kinases in the dataset. Kinases are highlighted as in the inset legend. The map was built using the KinMap tool. Illustration reproduced courtesy of Cell Signaling Technology, Inc. ([www.cellsignal.com](http://www.cellsignal.com)).

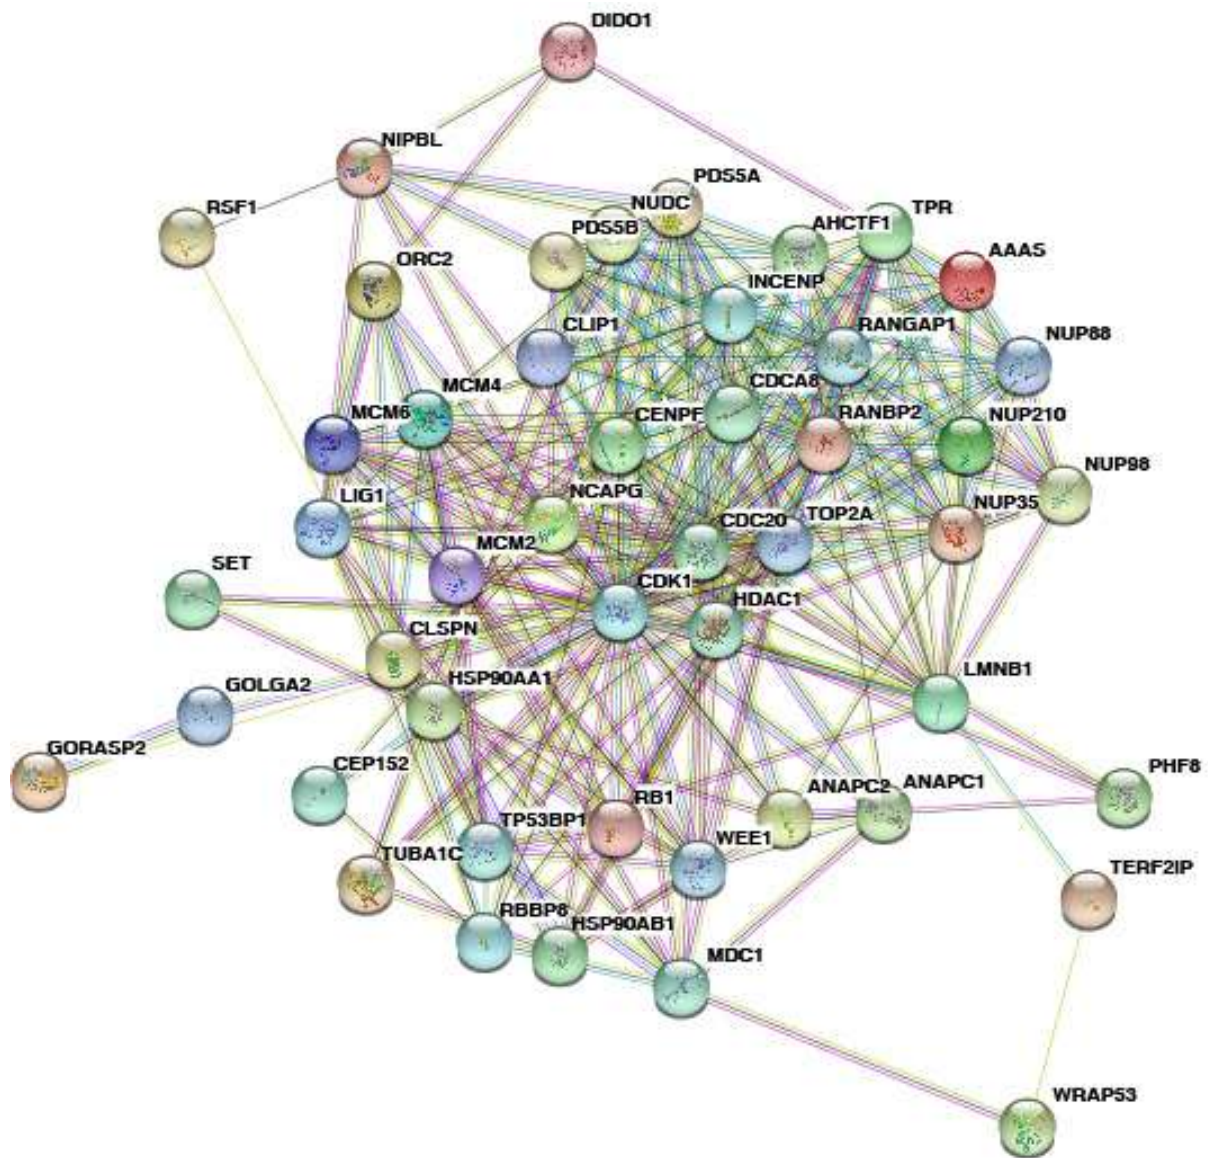

**Figure S4:** Protein-protein interaction network showing the interaction among 48 proteins involved in cell cycle pathway with highest confidence (0.90) acquired using STRING functional protein association network tool.

(a)

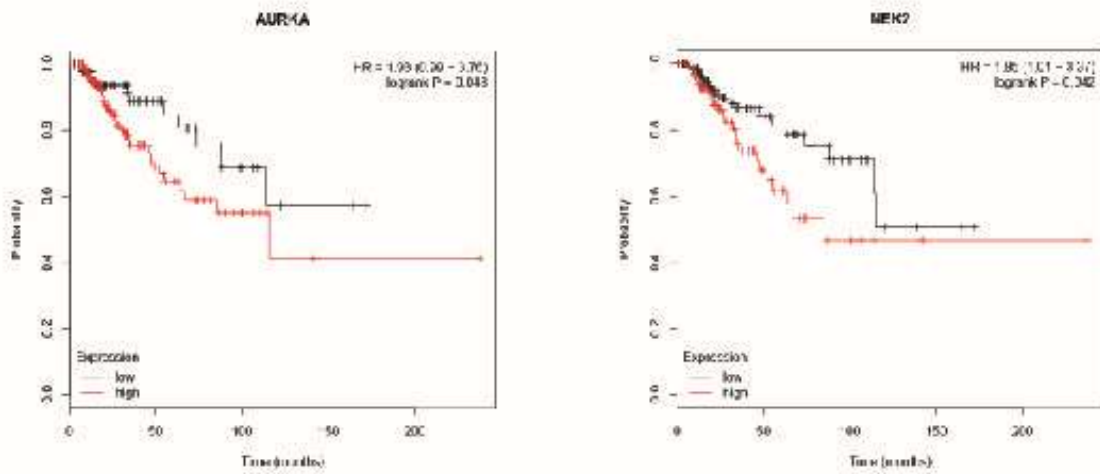

(b)

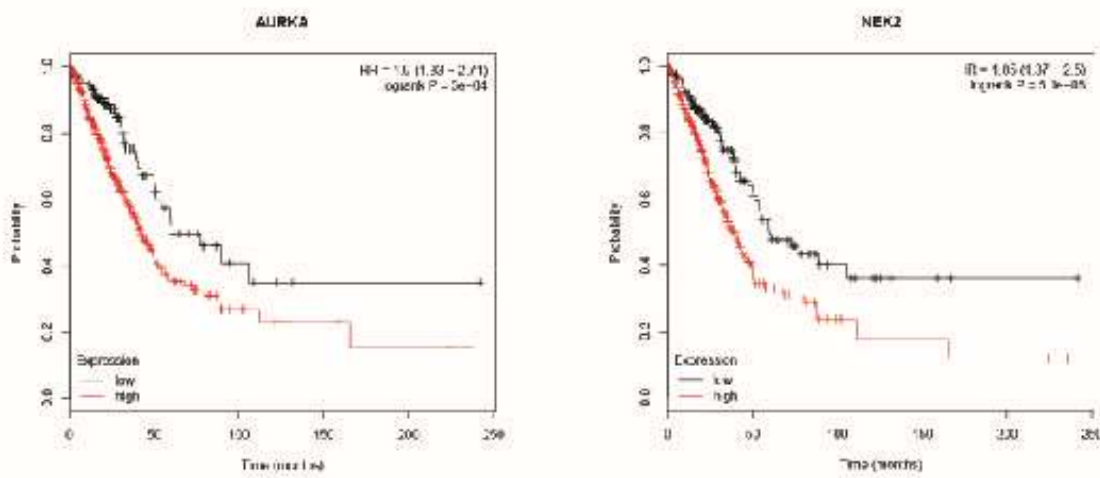

(c)

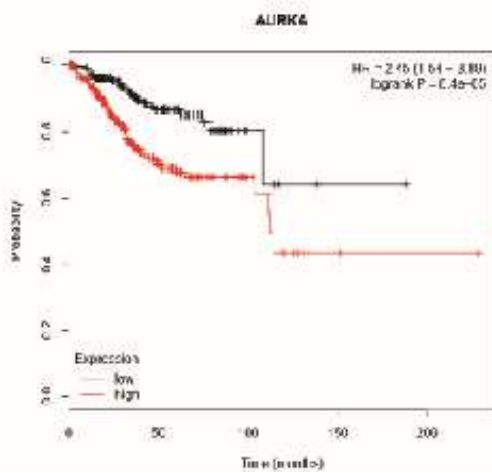

**Figure S5:** Kaplan-Meier plot for (a) breast cancer, (b) LUAD and (c) UCEC patients stratified according to high and low expression of AURKA and NEK2.

**Deb et al., 2019. Integrative global proteomic and phosphoproteomic datasets revealed activation of NEK2 and AURKA in cancer**

**Supplementary tables**

Table S1: Dysregulated phosphosites (1.5 fold) across the 6 cancer types

| <b>Protein ID</b> | <b>Site</b> | <b>Breast Cancer (FC)</b> | <b>Colon Cancer (FC)</b> | <b>Lung Adenocarcinoma (FC)</b> | <b>Ovarian Cancer (FC)</b> | <b>Clear Cell Renal Cell Carcinoma (FC)</b> | <b>Uterine Corpus Endometrial Carcinoma (FC)</b> |
|-------------------|-------------|---------------------------|--------------------------|---------------------------------|----------------------------|---------------------------------------------|--------------------------------------------------|
| ATRX              | S1352       | 6.01                      | 1.88                     | 2.32                            | 2.49                       | 0.58                                        | 4.08                                             |
| HBA1              | S132        | 0.15                      | 0.45                     | 0.34                            | 0.50                       | 2.10                                        | 0.36                                             |
| POLR2A            | S1917       | 11.35                     | 1.92                     | 2.67                            | 1.52                       | 0.61                                        | 1.88                                             |
| POLR2A            | S1931       | 11.35                     | 1.92                     | 2.67                            | 1.52                       | 0.61                                        | 1.88                                             |
| CHD3              | T1611       | 9.02                      | 1.81                     | 3.06                            | 3.81                       | 0.42                                        | 3.52                                             |
| RHBDF2            | S148        | 5.25                      | 1.86                     | 1.62                            | 2.78                       | 2.17                                        | 2.33                                             |
| TMCC1             | S382        | 4.79                      | 1.74                     | 2.66                            | 1.96                       | 2.07                                        | 3.68                                             |
| CANX              | S554        | 11.16                     | 1.91                     | 1.98                            | 3.00                       | 3.28                                        | 0.51                                             |
| CANX              | S564        | 12.00                     | 1.67                     | 2.37                            | 3.76                       | 2.70                                        | 0.51                                             |
| CANX              | T562        | 11.22                     | 1.79                     | 1.83                            | 3.62                       | 2.70                                        | 0.51                                             |
| ARFIP1            | S39         | 14.80                     | 1.70                     | 3.60                            | 3.03                       | 0.55                                        | 2.41                                             |
| FOXK1             | S213        | 5.45                      | 3.78                     | 3.08                            | 4.42                       | 2.27                                        | 2.60                                             |
| FOXK1             | S223        | 9.41                      | 3.78                     | 3.70                            | 4.65                       | 2.27                                        | 2.09                                             |
| SRSF5             | S120        | 4.29                      | 2.66                     | 2.57                            | 2.38                       | 0.55                                        | 2.53                                             |
| SPP1              | S219        | 8.66                      | 1.76                     | 3.49                            | 1.95                       | 0.35                                        | 3.08                                             |
| SPP1              | S234        | 14.32                     | 4.14                     | 4.59                            | 2.50                       | 0.21                                        | 2.45                                             |
| SPP1              | S254        | 4.89                      | 2.09                     | 10.09                           | 5.67                       | 0.20                                        | 2.62                                             |
| SPP1              | S258        | 6.16                      | 2.52                     | 5.67                            | 4.12                       | 0.17                                        | 4.15                                             |
| SPP1              | S263        | 6.86                      | 2.14                     | 8.40                            | 5.67                       | 0.17                                        | 2.58                                             |
| SPP1              | S267        | 5.96                      | 2.83                     | 5.79                            | 40.88                      | 0.17                                        | 2.75                                             |
| ACBD5             | S156        | 12.42                     | 1.97                     | 9.03                            | 1.72                       | 0.45                                        | 1.93                                             |
| CARHSP1           | S30         | 3.73                      | 1.77                     | 2.24                            | 2.89                       | 2.23                                        | 1.81                                             |
| CARHSP1           | S32         | 2.70                      | 1.77                     | 2.19                            | 2.99                       | 2.23                                        | 1.95                                             |
| RERE              | S679        | 4.78                      | 1.78                     | 2.21                            | 2.98                       | 0.44                                        | 3.10                                             |
| MYH14             | S1997       | 9.51                      | 1.88                     | 2.48                            | 1317.20                    | 0.45                                        | 2.62                                             |
| TLE3              | S205        | 6.33                      | 2.09                     | 2.79                            | 2.13                       | 2.16                                        | 1.90                                             |
| DDX54             | S782        | 9.15                      | 2.75                     | 2.73                            | 2.01                       | 1.77                                        | 2.34                                             |
| NDRG1             | S332        | 2.91                      | 2.25                     | 2.27                            | 2.37                       | 2.32                                        | 2.25                                             |
| TCOF1             | S1339       | 8.82                      | 2.01                     | 3.58                            | 0.64                       | 1.72                                        | 2.07                                             |
| TCOF1             | S156        | 15.21                     | 4.12                     | 5.63                            | 4.01                       | 2.31                                        | 2.54                                             |
| RCOR3             | S433        | 5.62                      | 1.87                     | 1.58                            | 2.34                       | 0.60                                        | 0.58                                             |
| RCOR3             | T434        | 5.62                      | 1.89                     | 1.75                            | 2.34                       | 0.60                                        | 0.53                                             |

|          |       |       |      |      |       |      |      |
|----------|-------|-------|------|------|-------|------|------|
| TP53BP1  | S1072 | 13.12 | 2.23 | 3.26 | 2.59  | 1.74 | 6.08 |
| TP53BP1  | S1683 | 20.77 | 2.56 | 5.34 | 5.58  | 1.73 | 3.59 |
| PPP1R13L | S134  | 6.72  | 1.88 | 2.06 | 2.27  | 1.77 | 2.01 |
| ZNF652   | S100  | 3.62  | 2.77 | 2.66 | 14.99 | 0.41 | 2.24 |
| KDM3A    | S463  | 12.21 | 2.19 | 6.92 | 1.82  | 3.05 | 2.60 |
| SLC25A5  | S42   | 6.51  | 1.89 | 2.97 | 2.53  | 0.27 | 1.73 |
| HTATSF1  | S616  | 13.35 | 2.19 | 2.75 | 2.75  | 0.44 | 2.81 |
| VDAC2    | S130  | 7.37  | 2.32 | 2.64 | 2.49  | 1.77 | 2.17 |
| MATR3    | S604  | 10.28 | 2.20 | 3.04 | 2.49  | 0.60 | 2.02 |
| SRSF2    | S189  | 5.45  | 2.17 | 2.75 | 3.83  | 0.31 | 2.01 |
| PPP1R12B | S17   | 1.71  | 0.52 | 1.52 | 2.28  | 0.59 | 0.11 |
| DPYSL3   | T623  | 4.15  | 0.51 | 2.29 | 2.57  | 1.99 | 0.42 |
| KCNAB2   | S9    | 5.10  | 1.84 | 2.03 | 1.86  | 1.82 | 1.67 |
| RBM15    | S674  | 4.15  | 2.20 | 2.25 | 1.83  | 0.48 | 1.68 |
| SLC20A2  | S256  | 7.96  | 2.11 | 3.04 | 1.68  | 0.42 | 3.10 |
| CDC20    | S41   | 7.33  | 2.04 | 5.46 | 2.97  | 2.23 | 2.51 |
| TJP3     | S112  | 21.02 | 2.85 | 2.18 | 2.45  | 0.15 | 2.43 |
| TJP3     | S319  | 11.21 | 1.85 | 2.27 | 3.26  | 0.23 | 4.58 |
| TJP3     | S327  | 8.53  | 2.06 | 1.95 | 3.26  | 0.54 | 6.50 |
| DOCK7    | S900  | 4.13  | 1.65 | 3.60 | 3.48  | 0.56 | 2.42 |
| FARP1    | S920  | 5.65  | 1.72 | 2.06 | 1.82  | 0.55 | 3.75 |
| TEX2     | S790  | 6.54  | 1.77 | 1.59 | 2.29  | 1.62 | 2.16 |
| HSH2D    | S137  | 8.03  | 2.07 | 3.08 | 2.18  | 2.29 | 3.12 |
| BAZ2A    | S1768 | 10.93 | 2.38 | 2.33 | 4.41  | 1.66 | 3.80 |
| BCLAF1   | S288  | 6.18  | 2.00 | 2.23 | 2.98  | 0.58 | 2.24 |
| BCLAF1   | S387  | 11.08 | 1.92 | 2.31 | 2.93  | 0.59 | 3.13 |
| SRRM1    | S768  | 8.43  | 2.02 | 3.28 | 2.23  | 0.53 | 2.38 |
| CAD      | S1796 | 4.33  | 2.44 | 3.79 | 2.17  | 1.99 | 1.91 |
| HMGA1    | S36   | 6.23  | 2.44 | 2.23 | 3.70  | 0.48 | 2.34 |
| SNX27    | S51   | 3.82  | 2.43 | 2.57 | 1.87  | 0.49 | 1.86 |
| PPP1R35  | S52   | 4.29  | 1.72 | 1.89 | 3.87  | 1.78 | 1.86 |
| CRYBG1   | S22   | 4.46  | 3.19 | 2.35 | 0.46  | 0.43 | 2.09 |
| ARVCF    | S343  | 3.43  | 2.61 | 2.24 | 2.21  | 0.42 | 2.42 |



|         |       |       |      |      |        |      |      |
|---------|-------|-------|------|------|--------|------|------|
| ATP2B1  | S1182 | 7.29  | 1.81 | 2.00 | 9.28   | 0.51 | 2.13 |
| CAV1    | S37   | 0.46  | 0.39 | 0.15 | 0.09   | 3.43 | 0.21 |
| DES     | S28   | 0.39  | 0.48 | 0.25 | 0.26   | 0.38 | 0.50 |
| DES     | S32   | 0.34  | 0.34 | 0.00 | 0.26   | 0.45 | 0.28 |
| DSG2    | S701  | 14.71 | 2.33 | 7.35 | 4.50   | 1.94 | 3.87 |
| ITPR3   | S2670 | 3.05  | 1.94 | 1.66 | 2.38   | 1.82 | 1.87 |
| KRT19   | S14   | 4.65  | 1.57 | 2.55 | 2.73   | 0.36 | 1.96 |
| LSP1    | S177  | 7.28  | 1.68 | 1.97 | 2.53   | 1.85 | 2.13 |
| LSP1    | S188  | 8.93  | 1.75 | 2.00 | 2.53   | 1.87 | 2.04 |
| LSP1    | S189  | 9.40  | 1.82 | 2.59 | 2.12   | 1.86 | 1.84 |
| LSP1    | T175  | 5.30  | 1.83 | 1.76 | 253.06 | 1.87 | 1.94 |
| MARCKS  | S145  | 8.47  | 2.08 | 2.63 | 2.50   | 0.44 | 2.30 |
| MARCKS  | S147  | 7.29  | 0.63 | 2.62 | 2.50   | 0.44 | 2.80 |
| MARCKS  | T150  | 8.02  | 2.08 | 2.08 | 2.11   | 0.58 | 1.85 |
| MKI67   | S357  | 33.29 | 3.02 | 6.39 | 3.24   | 3.09 | 2.79 |
| MKI67   | S374  | 12.51 | 1.82 | 4.84 | 5.52   | 2.69 | 3.69 |
| PRPF4B  | S144  | 4.73  | 1.95 | 2.18 | 3.00   | 0.60 | 2.50 |
| DSP     | S2825 | 6.78  | 1.81 | 2.29 | 2.36   | 0.56 | 2.91 |
| MCM2    | S139  | 6.95  | 2.69 | 5.32 | 2.64   | 1.94 | 2.06 |
| TRA2B   | S264  | 3.27  | 3.47 | 2.71 | 3.56   | 0.50 | 1.95 |
| DLG5    | S1000 | 8.83  | 1.72 | 2.80 | 2.26   | 2.52 | 1.83 |
| PPIG    | S745  | 8.50  | 1.96 | 2.48 | 2.24   | 0.45 | 2.48 |
| ABCC1   | S930  | 9.14  | 2.87 | 3.49 | 2.48   | 2.14 | 1.83 |
| AKAP12  | S286  | 0.23  | 0.29 | 0.40 | 0.28   | 0.28 | 0.15 |
| NCL     | S34   | 4.75  | 2.59 | 2.80 | 4.75   | 0.33 | 2.35 |
| NCL     | S41   | 6.47  | 2.48 | 2.43 | 4.92   | 0.33 | 2.30 |
| NCL     | T76   | 6.98  | 2.49 | 4.81 | 4.08   | 2.27 | 2.83 |
| ZRANB2  | S307  | 9.22  | 2.24 | 2.00 | 1.87   | 0.65 | 2.47 |
| LAD1    | S177  | 4.19  | 2.33 | 6.06 | 3.72   | 0.15 | 4.14 |
| LAD1    | S64   | 4.04  | 1.84 | 3.49 | 2.22   | 0.24 | 2.04 |
| STUB1   | S19   | 4.70  | 2.24 | 3.84 | 3.35   | 2.03 | 1.78 |
| STUB1   | S23   | 5.09  | 2.65 | 2.94 | 3.35   | 2.03 | 1.78 |
| MCM6    | S762  | 7.58  | 2.55 | 4.83 | 1.83   | 2.50 | 2.00 |
| RANBP2  | T1396 | 7.28  | 1.90 | 3.39 | 2.92   | 1.82 | 3.03 |
| NCOR2   | S554  | 16.93 | 2.28 | 2.54 | 4.25   | 1.92 | 0.38 |
| SLC12A7 | T973  | 4.38  | 1.52 | 1.99 | 1.93   | 1.79 | 1.95 |

|         |       |       |      |      |      |      |      |
|---------|-------|-------|------|------|------|------|------|
| NUDC    | T145  | 6.17  | 2.91 | 3.18 | 3.89 | 0.23 | 1.92 |
| KIF1C   | S676  | 7.75  | 1.68 | 2.20 | 1.85 | 0.53 | 2.34 |
| AKAP13  | S983  | 6.72  | 1.91 | 3.49 | 1.84 | 1.75 | 1.71 |
| AKAP13  | T953  | 4.39  | 1.93 | 2.10 | 2.84 | 1.77 | 1.66 |
| OGFR    | S378  | 4.60  | 2.16 | 2.27 | 2.48 | 2.68 | 1.70 |
| RABGAP1 | S56   | 6.11  | 1.90 | 2.36 | 4.79 | 0.52 | 3.15 |
| CAVIN1  | S171  | 0.17  | 0.18 | 0.18 | 0.10 | 1.68 | 0.32 |
| DNTTIP2 | T232  | 3.80  | 2.25 | 2.45 | 2.18 | 0.62 | 2.23 |
| PDAP1   | S63   | 2.60  | 1.75 | 2.70 | 2.71 | 0.34 | 2.06 |
| TBC1D9B | S432  | 3.25  | 2.06 | 1.91 | 5.57 | 1.55 | 2.52 |
| RRP1B   | S736  | 2.09  | 2.21 | 1.74 | 2.25 | 2.07 | 2.19 |
| ZC3H4   | S1275 | 7.11  | 1.91 | 2.44 | 2.83 | 1.52 | 1.82 |
| LARP1   | S471  | 4.30  | 2.34 | 2.15 | 2.44 | 2.58 | 1.87 |
| LARP1   | S477  | 5.03  | 1.96 | 1.83 | 2.29 | 2.58 | 0.43 |
| LARP1   | T449  | 3.75  | 1.84 | 2.95 | 2.63 | 2.01 | 1.86 |
| SCRIB   | S1306 | 5.01  | 1.74 | 2.20 | 2.67 | 0.60 | 2.09 |
| GPATCH4 | S135  | 12.30 | 3.10 | 5.43 | 3.50 | 1.75 | 3.02 |
| RSL1D1  | S427  | 21.10 | 5.77 | 6.22 | 7.17 | 3.16 | 4.34 |
| EIF5B   | S1168 | 4.79  | 1.98 | 3.32 | 2.29 | 1.94 | 2.30 |
| SRRM2   | S1925 | 43.54 | 2.30 | 2.54 | 3.37 | 0.39 | 3.95 |
| SRRM2   | S1948 | 43.54 | 2.30 | 2.54 | 3.37 | 0.39 | 3.95 |
| SRRM2   | S1960 | 43.54 | 2.30 | 2.54 | 3.37 | 0.39 | 3.95 |
| SRRM2   | S783  | 8.76  | 2.05 | 2.24 | 2.30 | 0.55 | 2.28 |
| SRRM2   | S864  | 13.08 | 1.96 | 2.65 | 2.12 | 0.61 | 1.88 |
| SRRM2   | T2034 | 5.69  | 1.98 | 3.33 | 2.90 | 0.46 | 1.72 |
| GOLM1   | S187  | 6.62  | 1.69 | 1.96 | 3.07 | 0.18 | 0.49 |
| GOLM1   | S191  | 6.45  | 2.16 | 1.82 | 0.40 | 0.25 | 0.49 |
| MAPT    | T522  | 3.51  | 0.42 | 2.76 | 0.51 | 2.28 | 0.42 |
| IWS1    | S422  | 10.07 | 2.39 | 5.18 | 1.82 | 0.51 | 4.63 |
| IWS1    | S513  | 13.05 | 2.72 | 2.78 | 3.96 | 0.48 | 2.39 |
| ASXL2   | S395  | 8.41  | 2.14 | 2.78 | 2.01 | 0.57 | 1.70 |
| SASH3   | S38   | 4.04  | 2.20 | 2.21 | 2.25 | 1.91 | 2.68 |
| EML4    | S134  | 9.37  | 2.46 | 4.62 | 3.73 | 1.92 | 2.62 |
| EML4    | S146  | 6.70  | 1.76 | 2.84 | 3.46 | 2.13 | 2.48 |
| EML4    | T897  | 5.87  | 1.57 | 1.78 | 4.18 | 1.78 | 1.95 |
| EML4    | T899  | 5.47  | 1.62 | 2.03 | 4.18 | 1.78 | 1.95 |

|          |      |       |      |      |      |      |      |
|----------|------|-------|------|------|------|------|------|
| KIAA1217 | S361 | 2.16  | 1.73 | 1.74 | 3.60 | 1.54 | 1.94 |
| ZC3HAV1  | S346 | 6.57  | 2.12 | 3.00 | 7.41 | 1.89 | 1.62 |
| CBX8     | S256 | 10.08 | 1.68 | 3.00 | 8.45 | 2.14 | 2.28 |
| CAMSAP3  | S814 | 13.41 | 2.46 | 3.30 | 3.26 | 0.46 | 2.63 |
| NDUFV3   | S158 | 5.22  | 1.88 | 2.29 | 1.76 | 0.58 | 1.87 |
| PGM5     | S122 | 0.47  | 0.23 | 0.52 | 0.18 | 0.47 | 0.32 |
| SUDS3    | S53  | 8.14  | 2.09 | 2.91 | 2.82 | 0.44 | 2.23 |
| SUDS3    | T49  | 6.97  | 2.31 | 2.29 | 2.38 | 0.50 | 2.28 |
| CCDC86   | S110 | 3.91  | 2.62 | 2.63 | 3.30 | 2.28 | 8.33 |
| IRF2BPL  | T636 | 6.69  | 1.84 | 2.36 | 3.47 | 0.56 | 0.56 |
| RNF219   | S210 | 22.08 | 4.84 | 6.29 | 6.00 | 2.24 | 3.15 |
| TANC2    | S400 | 11.51 | 1.97 | 2.91 | 2.92 | 1.73 | 1.76 |
| NSRP1    | S254 | 8.03  | 2.13 | 3.40 | 6.88 | 0.47 | 3.05 |
| CALD1    | S759 | 3.41  | 0.46 | 2.13 | 0.11 | 0.50 | 0.54 |
| CALD1    | S498 | 3.41  | 0.46 | 2.13 | 0.11 | 0.50 | 0.54 |
| PML      | S403 | 3.34  | 2.69 | 2.55 | 3.34 | 1.89 | 1.72 |
| PML      | T409 | 7.73  | 2.66 | 2.55 | 4.59 | 1.89 | 1.72 |
| AHNAK2   | S851 | 2.95  | 0.38 | 2.98 | 0.25 | 3.73 | 0.44 |
| GLCCI1   | S148 | 3.06  | 1.58 | 2.67 | 2.62 | 1.66 | 2.13 |
| LMNA     | S390 | 1.86  | 1.63 | 1.90 | 2.78 | 1.86 | 0.44 |
| LMNA     | T409 | 7.87  | 1.93 | 2.53 | 2.76 | 1.55 | 0.29 |
| DIP2B    | S146 | 4.62  | 1.74 | 2.52 | 2.07 | 0.63 | 2.17 |
| STT3B    | S498 | 7.91  | 2.31 | 2.32 | 3.68 | 0.56 | 2.17 |
| STT3B    | S499 | 4.59  | 2.17 | 2.14 | 3.11 | 0.56 | 1.96 |

Table S2: Signature phosphosites (1.5 fold) across the 5 cancer types

| Protein ID | Site | Regulation Pattern | Breast Cancer | Colon Cancer | Lung Adenocarcinoma | Ovarian Cancer | Uterine Corpus Endometrial Carcinoma |
|------------|------|--------------------|---------------|--------------|---------------------|----------------|--------------------------------------|
| MSH6       | S830 | Hyper              | 6.44          | 2.12         | 4.58                | 2.96           | 2.13                                 |
| KRT18      | S30  | Hyper              | 8.60          | 1.67         | 5.10                | 3.45           | 3.28                                 |
| LIG1       | S141 | Hyper              | 7.31          | 2.07         | 2.60                | 2.00           | 1.92                                 |
| LIG1       | S51  | Hyper              | 23.87         | 2.34         | 9.96                | 2.89           | 4.68                                 |

|           |       |       |       |      |      |      |      |
|-----------|-------|-------|-------|------|------|------|------|
| LIG1      | T182  | Hyper | 12.82 | 2.03 | 5.48 | 2.06 | 2.46 |
| LIG1      | T183  | Hyper | 9.27  | 2.61 | 6.02 | 4.21 | 3.32 |
| PGK1      | S203  | Hyper | 4.31  | 2.34 | 4.04 | 3.19 | 2.71 |
| RB1       | S249  | Hyper | 10.51 | 2.80 | 2.51 | 2.28 | 2.34 |
| RB1       | S807  | Hyper | 17.25 | 3.05 | 2.32 | 3.22 | 2.14 |
| RB1       | T373  | Hyper | 3.69  | 2.05 | 2.85 | 1.86 | 2.78 |
| SMN1      | S31   | Hyper | 5.73  | 2.14 | 2.52 | 2.10 | 2.30 |
| KRT17     | S32   | Hyper | 2.27  | 2.22 | 2.35 | 2.76 | 2.09 |
| ATRX      | S1352 | Hyper | 6.01  | 1.88 | 2.32 | 2.49 | 4.08 |
| ATRX      | S1996 | Hyper | 6.42  | 1.87 | 2.41 | 2.82 | 2.12 |
| HBA1      | S132  | Hypo  | 0.15  | 0.45 | 0.34 | 0.50 | 0.36 |
| DCK       | T72   | Hyper | 8.12  | 1.73 | 2.15 | 1.81 | 1.83 |
| POLR2A    | S1850 | Hyper | 5.23  | 2.28 | 2.69 | 1.86 | 1.65 |
| POLR2A    | S1917 | Hyper | 11.35 | 1.92 | 2.67 | 1.52 | 1.88 |
| POLR2A    | S1931 | Hyper | 11.35 | 1.92 | 2.67 | 1.52 | 1.88 |
| RPL12     | S38   | Hyper | 8.00  | 3.38 | 5.91 | 3.95 | 3.71 |
| RPL18A    | S123  | Hyper | 4.65  | 1.80 | 2.85 | 2.19 | 3.33 |
| AFTPH     | S382  | Hyper | 8.12  | 2.44 | 2.06 | 1.91 | 2.42 |
| AFTPH     | S411  | Hyper | 14.56 | 1.65 | 3.14 | 5.57 | 2.03 |
| RAB11FIP1 | S389  | Hyper | 17.00 | 2.45 | 2.75 | 2.15 | 2.62 |
| GPATCH8   | S740  | Hyper | 9.66  | 2.35 | 2.61 | 3.63 | 2.03 |
| GPATCH8   | S914  | Hyper | 12.04 | 2.43 | 2.61 | 2.83 | 3.01 |
| GPATCH8   | S981  | Hyper | 3.92  | 1.99 | 2.15 | 2.38 | 1.86 |
| PKP2      | S155  | Hyper | 8.67  | 2.04 | 1.83 | 3.53 | 2.22 |
| CHD3      | T1611 | Hyper | 9.02  | 1.81 | 3.06 | 3.81 | 3.52 |
| RHBDF2    | S148  | Hyper | 5.25  | 1.86 | 1.62 | 2.78 | 2.33 |
| WASHC2A   | S158  | Hyper | 4.86  | 1.73 | 1.64 | 3.96 | 1.73 |
| ARHGAP17  | S575  | Hyper | 4.96  | 2.16 | 1.97 | 2.00 | 1.79 |
| ATN1      | S101  | Hyper | 7.85  | 1.87 | 2.11 | 3.60 | 2.16 |
| USP20     | S413  | Hyper | 11.93 | 1.69 | 3.20 | 2.01 | 1.82 |
| ABI1      | S183  | Hyper | 4.53  | 1.61 | 1.80 | 2.16 | 1.69 |
| PAK4      | S104  | Hyper | 4.60  | 1.81 | 1.92 | 2.45 | 1.70 |
| ZNF638    | S128  | Hyper | 8.02  | 1.85 | 3.47 | 2.43 | 1.74 |
| RTKN      | S106  | Hyper | 11.60 | 2.56 | 1.81 | 2.81 | 2.55 |
| RTKN      | S543  | Hyper | 7.19  | 2.11 | 2.38 | 3.19 | 2.56 |
| PHF6      | S154  | Hyper | 5.64  | 2.93 | 3.00 | 3.31 | 3.29 |
| TMCC1     | S382  | Hyper | 4.79  | 1.74 | 2.66 | 1.96 | 3.68 |
| HSP90AA1  | S385  | Hyper | 4.68  | 1.65 | 2.16 | 2.58 | 1.74 |
| FNBP1L    | S443  | Hyper | 4.07  | 1.87 | 2.63 | 2.96 | 2.23 |
| ABCF1     | S109  | Hyper | 2.12  | 2.46 | 2.79 | 3.00 | 1.86 |
| ARFIP1    | S39   | Hyper | 14.80 | 1.70 | 3.60 | 3.03 | 2.41 |
| NOP2      | S177  | Hyper | 10.95 | 2.34 | 2.82 | 2.96 | 1.66 |
| NOP2      | S67   | Hyper | 26.05 | 5.71 | 4.38 | 3.71 | 1.97 |

|         |       |       |       |      |       |         |      |
|---------|-------|-------|-------|------|-------|---------|------|
| GTF3C2  | S167  | Hyper | 12.83 | 2.16 | 1.90  | 3.66    | 2.05 |
| FOXK1   | S213  | Hyper | 5.45  | 3.78 | 3.08  | 4.42    | 2.60 |
| FOXK1   | S223  | Hyper | 9.41  | 3.78 | 3.70  | 4.65    | 2.09 |
| FOXK1   | S257  | Hyper | 2.91  | 1.82 | 1.76  | 1.54    | 2.08 |
| FOXK1   | S441  | Hyper | 5.41  | 2.09 | 1.91  | 2.16    | 2.74 |
| FOXK1   | S445  | Hyper | 4.51  | 2.59 | 1.99  | 2.21    | 2.74 |
| FOXK1   | T436  | Hyper | 4.68  | 2.01 | 2.18  | 3.15    | 1.99 |
| FOXK1   | Y219  | Hyper | 9.09  | 4.05 | 4.30  | 3.61    | 2.40 |
| NCKAP5L | S630  | Hyper | 9.19  | 2.01 | 3.13  | 9.63    | 2.19 |
| SRSF5   | S120  | Hyper | 4.29  | 2.66 | 2.57  | 2.38    | 2.53 |
| SRSF5   | S233  | Hyper | 2.55  | 2.63 | 2.94  | 2.60    | 4.06 |
| SPP1    | S219  | Hyper | 8.66  | 1.76 | 3.49  | 1.95    | 3.08 |
| SPP1    | S234  | Hyper | 14.32 | 4.14 | 4.59  | 2.50    | 2.45 |
| SPP1    | S254  | Hyper | 4.89  | 2.09 | 10.09 | 5.67    | 2.62 |
| SPP1    | S258  | Hyper | 6.16  | 2.52 | 5.67  | 4.12    | 4.15 |
| SPP1    | S263  | Hyper | 6.86  | 2.14 | 8.40  | 5.67    | 2.58 |
| SPP1    | S267  | Hyper | 5.96  | 2.83 | 5.79  | 40.88   | 2.75 |
| INCENP  | S263  | Hyper | 4.01  | 2.40 | 1.86  | 1.98    | 2.24 |
| ANKZF1  | S56   | Hyper | 14.78 | 3.14 | 3.81  | 4.36    | 3.75 |
| ACBD5   | S156  | Hyper | 12.42 | 1.97 | 9.03  | 1.72    | 1.93 |
| ACBD5   | S374  | Hyper | 20.45 | 2.06 | 6.17  | 1.71    | 2.97 |
| CARHSP1 | S30   | Hyper | 3.73  | 1.77 | 2.24  | 2.89    | 1.81 |
| CARHSP1 | S32   | Hyper | 2.70  | 1.77 | 2.19  | 2.99    | 1.95 |
| CARHSP1 | T45   | Hyper | 2.67  | 1.63 | 2.06  | 9.40    | 2.73 |
| RRBP1   | S185  | Hyper | 8.57  | 2.93 | 5.60  | 2.51    | 2.01 |
| RRBP1   | S526  | Hyper | 3.74  | 1.72 | 2.98  | 1.92    | 1.70 |
| PARP2   | S33   | Hyper | 16.92 | 6.02 | 3.50  | 3.03    | 5.96 |
| PARP2   | S34   | Hyper | 7.59  | 3.06 | 1.91  | 2.44    | 2.26 |
| RERE    | S679  | Hyper | 4.78  | 1.78 | 2.21  | 2.98    | 3.10 |
| UHRF1   | S287  | Hyper | 9.37  | 3.24 | 4.15  | 2.54    | 3.58 |
| TOP2A   | S1106 | Hyper | 25.82 | 4.31 | 6.40  | 3.81    | 1.89 |
| TOP2A   | S1247 | Hyper | 23.54 | 3.85 | 13.14 | 5.44    | 3.49 |
| TOP2A   | S1393 | Hyper | 19.41 | 8.32 | 1.81  | 4.07    | 2.31 |
| TOP2B   | S1335 | Hyper | 5.40  | 3.15 | 2.86  | 1.72    | 2.59 |
| TOP2B   | S1337 | Hyper | 4.16  | 3.15 | 2.45  | 2.04    | 2.28 |
| TOP2B   | S1408 | Hyper | 5.64  | 1.92 | 2.19  | 3.69    | 2.37 |
| TOP2B   | T1398 | Hyper | 6.58  | 2.02 | 2.16  | 2.63    | 2.37 |
| ACSS2   | S267  | Hyper | 1.68  | 1.96 | 2.07  | 2.11    | 1.94 |
| ZC3H13  | S831  | Hyper | 6.83  | 2.14 | 2.23  | 2.05    | 3.03 |
| ZC3H13  | S833  | Hyper | 6.56  | 2.17 | 2.23  | 1.84    | 3.64 |
| ZC3H13  | S877  | Hyper | 4.16  | 2.24 | 1.72  | 2.19    | 2.23 |
| ZC3H13  | S993  | Hyper | 8.15  | 1.92 | 2.60  | 2.43    | 1.66 |
| MYH14   | S1991 | Hyper | 9.51  | 1.94 | 2.34  | 1317.20 | 2.79 |

|          |       |       |       |      |      |         |      |
|----------|-------|-------|-------|------|------|---------|------|
| MYH14    | S1997 | Hyper | 9.51  | 1.88 | 2.48 | 1317.20 | 2.62 |
| SEC31A   | S799  | Hyper | 7.72  | 1.84 | 2.97 | 2.69    | 1.69 |
| IRF2BP2  | S344  | Hyper | 5.86  | 2.45 | 2.22 | 2.88    | 1.71 |
| HNRNPC   | S220  | Hyper | 7.47  | 1.86 | 2.34 | 4.61    | 1.90 |
| HNRNPC   | S225  | Hyper | 12.37 | 1.96 | 2.88 | 2.83    | 1.61 |
| HNRNPC   | S226  | Hyper | 12.49 | 2.08 | 2.58 | 3.53    | 2.15 |
| KTN1     | S75   | Hyper | 9.50  | 1.71 | 2.15 | 3.91    | 2.07 |
| KTN1     | T153  | Hyper | 8.15  | 1.57 | 3.12 | 2.08    | 1.88 |
| PAICS    | S27   | Hyper | 5.91  | 2.40 | 5.56 | 2.13    | 3.09 |
| HNRNPUL2 | S168  | Hyper | 19.97 | 2.06 | 1.81 | 2.07    | 2.22 |
| DIAPH1   | S22   | Hyper | 4.49  | 2.08 | 2.47 | 3.35    | 2.72 |
| CCDC88C  | S227  | Hyper | 13.13 | 2.00 | 2.55 | 2.00    | 2.94 |
| U2SURP   | S67   | Hyper | 13.85 | 1.81 | 4.37 | 3.66    | 2.60 |
| MYO1C    | S1022 | Hypo  | 0.44  | 0.32 | 0.25 | 0.24    | 0.30 |
| THOC2    | S1393 | Hyper | 4.79  | 1.95 | 1.66 | 2.09    | 3.53 |
| TMEM214  | T97   | Hyper | 16.16 | 3.04 | 4.53 | 2.08    | 2.30 |
| ACLY     | S481  | Hyper | 6.30  | 1.80 | 1.87 | 2.38    | 1.82 |
| ZBTB21   | S435  | Hyper | 3.65  | 2.37 | 3.57 | 3.02    | 1.60 |
| HDAC7    | T413  | Hyper | 4.94  | 1.83 | 1.58 | 2.22    | 1.71 |
| BAG6     | S958  | Hyper | 5.17  | 2.04 | 2.30 | 3.05    | 1.83 |
| BAG6     | S967  | Hyper | 5.39  | 2.12 | 2.30 | 3.05    | 2.04 |
| AKT1S1   | S203  | Hyper | 6.51  | 2.35 | 2.12 | 1.92    | 2.01 |
| AKT1S1   | S211  | Hyper | 8.79  | 2.31 | 2.20 | 2.07    | 2.22 |
| AKT1S1   | S212  | Hyper | 9.90  | 2.31 | 2.54 | 2.52    | 1.92 |
| PDS5A    | S1305 | Hyper | 4.68  | 2.06 | 2.04 | 1.98    | 1.90 |
| NRDC     | S96   | Hyper | 8.31  | 1.79 | 2.04 | 2.15    | 2.33 |
| ZFAND5   | S48   | Hyper | 3.88  | 1.76 | 2.53 | 2.72    | 1.98 |
| TLE3     | S205  | Hyper | 6.33  | 2.09 | 2.79 | 2.13    | 1.90 |
| TLE3     | S286  | Hyper | 7.31  | 1.81 | 2.59 | 1.78    | 1.78 |
| MYBBP1A  | S1163 | Hyper | 6.15  | 3.45 | 2.76 | 3.79    | 2.77 |
| UBE4B    | S124  | Hyper | 2.87  | 1.85 | 2.14 | 2.59    | 1.72 |
| DDX54    | S782  | Hyper | 9.15  | 2.75 | 2.73 | 2.01    | 2.34 |
| BRD2     | S301  | Hyper | 4.34  | 1.56 | 2.34 | 1.64    | 1.67 |
| LSM14A   | S183  | Hyper | 3.57  | 1.91 | 1.76 | 2.54    | 1.76 |
| NCBP3    | S415  | Hyper | 10.03 | 2.34 | 3.17 | 1.98    | 1.66 |
| PHKA1    | S758  | Hyper | 3.68  | 3.07 | 5.06 | 2.74    | 3.08 |
| SET      | S63   | Hyper | 8.55  | 3.05 | 2.92 | 1.99    | 1.76 |
| SET      | S7    | Hyper | 12.31 | 1.89 | 2.58 | 3.26    | 2.35 |
| RACGAP1  | S203  | Hyper | 10.29 | 1.92 | 6.38 | 2.53    | 4.51 |
| RACGAP1  | T342  | Hyper | 8.41  | 2.26 | 4.24 | 2.68    | 2.81 |
| TFRC     | S34   | Hyper | 7.18  | 2.82 | 2.70 | 3.09    | 2.84 |
| CLK3     | S224  | Hyper | 4.30  | 2.19 | 2.49 | 1.83    | 1.68 |
| CLK3     | S226  | Hyper | 4.30  | 1.92 | 2.12 | 14.71   | 1.64 |

|          |       |       |       |      |      |        |      |
|----------|-------|-------|-------|------|------|--------|------|
| CLDN5    | T292  | Hypo  | 0.46  | 0.44 | 0.09 | 0.19   | 0.19 |
| MEF2A    | S108  | Hyper | 2.87  | 1.65 | 1.84 | 5.23   | 3.61 |
| ARHGEF18 | S733  | Hyper | 5.01  | 2.15 | 1.84 | 2.78   | 1.87 |
| TBC1D5   | S796  | Hyper | 2.60  | 2.00 | 2.22 | 2.07   | 1.79 |
| NDRG1    | S332  | Hyper | 2.91  | 2.25 | 2.27 | 2.37   | 2.25 |
| TCOF1    | S1193 | Hyper | 3.08  | 2.20 | 2.70 | 2.03   | 1.57 |
| TCOF1    | S156  | Hyper | 15.21 | 4.12 | 5.63 | 4.01   | 2.54 |
| TCOF1    | S381  | Hyper | 9.06  | 3.02 | 3.52 | 3.33   | 2.02 |
| TCOF1    | T1072 | Hyper | 7.05  | 2.18 | 2.12 | 2.59   | 1.84 |
| TCOF1    | T249  | Hyper | 8.07  | 1.96 | 3.12 | 2.02   | 1.96 |
| TCOF1    | T914  | Hyper | 10.15 | 2.47 | 2.71 | 2.11   | 1.71 |
| GRAMD1A  | S260  | Hyper | 9.49  | 3.16 | 5.34 | 7.51   | 3.30 |
| TRAF3IP1 | S359  | Hyper | 7.12  | 1.80 | 1.83 | 2.01   | 2.27 |
| TP53BP1  | S1033 | Hyper | 5.85  | 2.05 | 1.85 | 2.55   | 2.22 |
| TP53BP1  | S1072 | Hyper | 13.12 | 2.23 | 3.26 | 2.59   | 6.08 |
| TP53BP1  | S1073 | Hyper | 16.94 | 2.74 | 3.28 | 3.81   | 6.08 |
| TP53BP1  | S1099 | Hyper | 11.98 | 2.68 | 2.70 | 2.52   | 1.82 |
| TP53BP1  | S1106 | Hyper | 11.98 | 3.11 | 2.78 | 2.72   | 1.79 |
| TP53BP1  | S1431 | Hyper | 5.22  | 2.22 | 3.28 | 1.92   | 1.74 |
| TP53BP1  | S1623 | Hyper | 6.94  | 2.15 | 4.12 | 1.68   | 2.41 |
| TP53BP1  | S1683 | Hyper | 20.77 | 2.56 | 5.34 | 5.58   | 3.59 |
| TP53BP1  | S530  | Hyper | 9.01  | 2.10 | 7.03 | 1.99   | 1.71 |
| TP53BP1  | S644  | Hyper | 5.41  | 1.70 | 2.80 | 2.22   | 1.89 |
| TP53BP1  | S645  | Hyper | 4.63  | 1.70 | 2.39 | 1.94   | 1.89 |
| TP53BP1  | S836  | Hyper | 3.90  | 1.83 | 2.36 | 2.29   | 1.98 |
| TP53BP1  | S839  | Hyper | 3.90  | 3.25 | 2.46 | 2.71   | 2.21 |
| PPP1R13L | S134  | Hyper | 6.72  | 1.88 | 2.06 | 2.27   | 2.01 |
| SAR1A    | T139  | Hyper | 3.29  | 1.71 | 2.23 | 2.04   | 2.37 |
| ARHGAP32 | S952  | Hyper | 5.42  | 1.89 | 2.06 | 1.89   | 2.32 |
| ARHGAP32 | T1236 | Hyper | 5.31  | 1.84 | 2.27 | 2.07   | 3.61 |
| C17orf49 | S96   | Hyper | 6.82  | 2.96 | 4.94 | 2.41   | 2.95 |
| WRAP53   | S26   | Hyper | 8.46  | 2.14 | 2.93 | 2.73   | 1.95 |
| CTPS2    | S571  | Hyper | 5.08  | 1.68 | 2.37 | 334.30 | 2.46 |
| CTPS2    | S574  | Hyper | 5.11  | 1.81 | 2.28 | 2.86   | 1.70 |
| RRP12    | T77   | Hyper | 5.68  | 2.32 | 2.43 | 1.77   | 2.23 |
| KIAA1671 | S1701 | Hyper | 6.47  | 3.13 | 3.11 | 3.49   | 2.10 |
| ELF1     | S143  | Hyper | 3.01  | 1.98 | 1.78 | 2.14   | 2.10 |
| SIN3A    | S860  | Hyper | 8.57  | 2.42 | 2.25 | 3.04   | 1.92 |
| ZNF652   | S100  | Hyper | 3.62  | 2.77 | 2.66 | 14.99  | 2.24 |
| RBM17    | T71   | Hyper | 6.26  | 1.61 | 2.58 | 2.73   | 1.76 |
| KDM3A    | S463  | Hyper | 12.21 | 2.19 | 6.92 | 1.82   | 2.60 |
| SLC25A5  | S42   | Hyper | 6.51  | 1.89 | 2.97 | 2.53   | 1.73 |
| RBMXL1   | S208  | Hyper | 5.08  | 2.32 | 3.12 | 2.51   | 1.67 |

|          |       |       |       |      |       |      |      |
|----------|-------|-------|-------|------|-------|------|------|
| RBMXL1   | S58   | Hyper | 6.96  | 1.79 | 2.52  | 2.08 | 1.73 |
| HTATSF1  | S529  | Hyper | 11.27 | 2.02 | 4.15  | 3.65 | 2.28 |
| HTATSF1  | S616  | Hyper | 13.35 | 2.19 | 2.75  | 2.75 | 2.81 |
| PTBP3    | S426  | Hyper | 3.37  | 3.21 | 3.00  | 2.61 | 2.51 |
| CHAMP1   | S204  | Hyper | 8.63  | 1.97 | 2.08  | 3.45 | 1.92 |
| CHAMP1   | S214  | Hyper | 9.07  | 2.27 | 2.72  | 2.82 | 1.88 |
| CHAMP1   | S386  | Hyper | 3.67  | 2.34 | 1.90  | 2.26 | 2.01 |
| CHAMP1   | S432  | Hyper | 7.78  | 1.76 | 1.71  | 3.67 | 2.02 |
| FLNB     | S1536 | Hyper | 7.55  | 2.97 | 3.44  | 3.09 | 2.31 |
| RAPGEF6  | S1502 | Hyper | 2.77  | 1.65 | 1.85  | 1.95 | 1.96 |
| SKA3     | S155  | Hyper | 4.78  | 2.02 | 2.36  | 2.27 | 1.98 |
| UTP14A   | S353  | Hyper | 4.69  | 2.24 | 2.28  | 6.89 | 2.36 |
| CHD8     | S1420 | Hyper | 5.57  | 1.74 | 3.19  | 3.94 | 2.06 |
| CHD8     | S1424 | Hyper | 5.57  | 1.74 | 3.47  | 3.17 | 2.68 |
| LAS1L    | S543  | Hyper | 9.13  | 1.76 | 2.60  | 2.18 | 1.88 |
| DCAF1    | S978  | Hyper | 3.86  | 2.43 | 2.34  | 2.23 | 1.90 |
| RAB3GAP1 | T542  | Hyper | 10.27 | 2.09 | 3.05  | 1.83 | 2.32 |
| SHROOM1  | T103  | Hyper | 3.33  | 1.92 | 2.91  | 2.30 | 1.58 |
| AAAS     | S462  | Hyper | 5.27  | 2.84 | 2.52  | 3.93 | 2.09 |
| CARMIL1  | S122  | Hyper | 5.49  | 2.30 | 2.09  | 3.77 | 1.62 |
| CARMIL1  | S1282 | Hyper | 4.16  | 1.76 | 1.91  | 2.60 | 1.92 |
| BRD7     | S279  | Hyper | 8.98  | 1.93 | 2.21  | 2.87 | 1.72 |
| SMG7     | S739  | Hyper | 5.15  | 1.98 | 3.35  | 1.89 | 2.29 |
| SRPRA    | S270  | Hyper | 10.57 | 2.75 | 2.25  | 6.30 | 1.84 |
| SF1      | S205  | Hyper | 7.46  | 1.82 | 2.40  | 1.88 | 2.45 |
| VDAC2    | S130  | Hyper | 7.37  | 2.32 | 2.64  | 2.49 | 2.17 |
| PHF8     | S804  | Hyper | 9.45  | 2.14 | 2.11  | 2.06 | 4.37 |
| DGCR8    | S95   | Hyper | 4.13  | 1.66 | 2.13  | 2.14 | 1.86 |
| CLSPN    | S83   | Hyper | 33.47 | 4.85 | 10.01 | 4.39 | 3.21 |
| DIDO1    | S152  | Hyper | 4.96  | 2.43 | 2.39  | 2.25 | 2.39 |
| DIDO1    | S805  | Hyper | 4.54  | 1.90 | 1.83  | 2.42 | 2.59 |
| DIDO1    | S809  | Hyper | 5.61  | 1.81 | 1.92  | 1.74 | 1.94 |
| MATR3    | S598  | Hyper | 7.40  | 2.07 | 2.40  | 2.09 | 2.04 |
| MATR3    | S604  | Hyper | 10.28 | 2.20 | 3.04  | 2.49 | 2.02 |
| MATR3    | S766  | Hyper | 10.33 | 1.55 | 2.58  | 3.98 | 1.86 |
| CEP152   | S1461 | Hyper | 5.50  | 1.97 | 2.87  | 2.51 | 2.19 |
| DENND1B  | S596  | Hyper | 4.51  | 1.69 | 2.78  | 2.17 | 1.97 |
| SRSF2    | S189  | Hyper | 5.45  | 2.17 | 2.75  | 3.83 | 2.01 |
| SRSF2    | S191  | Hyper | 5.45  | 2.64 | 2.75  | 3.48 | 2.38 |
| CLINT1   | S227  | Hyper | 8.32  | 1.76 | 2.54  | 4.03 | 1.93 |
| CLINT1   | S299  | Hyper | 7.40  | 1.67 | 2.61  | 2.84 | 3.12 |
| CLINT1   | T294  | Hyper | 8.30  | 1.71 | 3.04  | 2.23 | 2.37 |
| KMT2A    | S351  | Hyper | 5.62  | 2.67 | 2.58  | 2.91 | 1.66 |



|          |       |       |       |      |      |       |       |
|----------|-------|-------|-------|------|------|-------|-------|
| EIF4G3   | S231  | Hyper | 5.89  | 1.62 | 2.35 | 1.69  | 1.92  |
| LRBA     | S2485 | Hyper | 3.45  | 1.72 | 2.94 | 2.94  | 2.00  |
| KCNAB2   | S9    | Hyper | 5.10  | 1.84 | 2.03 | 1.86  | 1.67  |
| PGM3     | S92   | Hyper | 4.23  | 1.82 | 2.53 | 2.55  | 2.12  |
| SAFB     | S383  | Hyper | 6.03  | 2.60 | 2.54 | 2.84  | 2.01  |
| SAFB     | S761  | Hyper | 9.80  | 1.74 | 3.19 | 2.65  | 1.80  |
| CORO7    | S21   | Hyper | 4.89  | 1.56 | 2.27 | 2.53  | 1.72  |
| RBM15    | S656  | Hyper | 11.07 | 2.19 | 2.29 | 3.41  | 1.75  |
| RBM15    | S670  | Hyper | 6.68  | 2.66 | 2.68 | 2.84  | 2.11  |
| RBM15    | S674  | Hyper | 4.15  | 2.20 | 2.25 | 1.83  | 1.68  |
| RBM15    | S700  | Hyper | 6.05  | 2.15 | 2.89 | 3.03  | 1.68  |
| RBM15    | S741  | Hyper | 11.85 | 2.30 | 2.69 | 3.62  | 1.92  |
| EZH2     | T487  | Hyper | 11.82 | 2.08 | 3.33 | 1.67  | 2.40  |
| RBM10    | S801  | Hyper | 8.27  | 1.97 | 2.12 | 1.66  | 1.75  |
| RBM10    | S803  | Hyper | 8.27  | 2.80 | 2.16 | 1.75  | 1.93  |
| RBM10    | S862  | Hyper | 4.17  | 1.56 | 2.09 | 2.58  | 1.76  |
| RBM10    | T156  | Hyper | 4.47  | 1.68 | 2.20 | 1.96  | 2.16  |
| ASPM     | S425  | Hyper | 5.25  | 1.73 | 2.89 | 3.14  | 1.83  |
| AKAP1    | S592  | Hyper | 14.55 | 2.41 | 5.09 | 2.46  | 1.70  |
| CLIP1    | S204  | Hyper | 4.27  | 1.86 | 2.17 | 2.02  | 1.93  |
| KRT8     | S302  | Hyper | 10.25 | 2.29 | 5.48 | 3.29  | 2.70  |
| KRT8     | S52   | Hyper | 9.30  | 1.87 | 2.05 | 2.83  | 3.16  |
| E2F8     | S417  | Hyper | 5.02  | 2.43 | 4.82 | 2.38  | 2.26  |
| MELK     | S457  | Hyper | 10.50 | 2.44 | 2.34 | 2.35  | 2.32  |
| CDCA8    | S219  | Hyper | 6.43  | 2.72 | 4.46 | 3.46  | 2.59  |
| SLC20A2  | S256  | Hyper | 7.96  | 2.11 | 3.04 | 1.68  | 3.10  |
| HNRNPH1  | S63   | Hyper | 4.63  | 2.38 | 2.55 | 2.41  | 2.05  |
| CDC20    | S41   | Hyper | 7.33  | 2.04 | 5.46 | 2.97  | 2.51  |
| WDR4     | S390  | Hyper | 6.59  | 3.66 | 4.08 | 2.88  | 1.88  |
| KIF18B   | S674  | Hyper | 14.60 | 2.01 | 3.24 | 3.78  | 2.73  |
| LARP7    | T264  | Hyper | 12.52 | 2.64 | 3.03 | 3.91  | 2.03  |
| TJP3     | S112  | Hyper | 21.02 | 2.85 | 2.18 | 2.45  | 2.43  |
| TJP3     | S319  | Hyper | 11.21 | 1.85 | 2.27 | 3.26  | 4.58  |
| TJP3     | S327  | Hyper | 8.53  | 2.06 | 1.95 | 3.26  | 6.50  |
| HSP90AB1 | S226  | Hyper | 6.04  | 3.36 | 2.84 | 2.68  | 1.71  |
| DOCK7    | S900  | Hyper | 4.13  | 1.65 | 3.60 | 3.48  | 2.42  |
| USP10    | S580  | Hyper | 3.66  | 1.81 | 2.65 | 2.99  | 1.67  |
| CHD2     | S1085 | Hyper | 7.88  | 1.99 | 1.74 | 41.41 | 12.06 |
| ESF1     | S153  | Hyper | 10.74 | 4.28 | 7.33 | 3.12  | 3.54  |
| ESF1     | S663  | Hyper | 6.66  | 3.02 | 3.24 | 3.78  | 1.74  |
| STIM1    | S257  | Hyper | 2.27  | 2.41 | 2.34 | 3.10  | 1.91  |
| LILRB4   | S318  | Hyper | 4.49  | 1.91 | 2.98 | 1.68  | 1.99  |
| LILRB4   | S319  | Hyper | 10.43 | 1.76 | 2.98 | 2.22  | 1.99  |

|          |       |       |       |      |      |      |      |
|----------|-------|-------|-------|------|------|------|------|
| RANGAP1  | S442  | Hyper | 11.83 | 4.22 | 4.64 | 4.20 | 2.23 |
| PBK      | S59   | Hyper | 9.29  | 2.33 | 3.74 | 6.19 | 2.95 |
| ARHGAP27 | S466  | Hyper | 10.49 | 1.68 | 2.20 | 1.97 | 1.84 |
| ADNP     | S98   | Hyper | 14.15 | 2.21 | 3.49 | 5.37 | 2.53 |
| JMJD1C   | S470  | Hyper | 6.30  | 2.67 | 2.36 | 4.04 | 1.96 |
| CCAR1    | S682  | Hyper | 12.59 | 2.21 | 2.60 | 2.25 | 1.78 |
| SIPA1L1  | S1181 | Hyper | 5.57  | 2.25 | 2.18 | 2.76 | 2.40 |
| SIPA1L1  | S1249 | Hyper | 11.74 | 1.83 | 3.51 | 3.16 | 1.86 |
| SIPA1L1  | S1487 | Hyper | 6.05  | 2.30 | 2.94 | 3.25 | 2.10 |
| SIPA1L1  | S1507 | Hyper | 2.92  | 2.52 | 2.65 | 3.19 | 2.55 |
| NOLC1    | S518  | Hyper | 13.90 | 4.84 | 4.50 | 3.68 | 3.39 |
| NOLC1    | S573  | Hyper | 16.43 | 3.20 | 2.84 | 2.65 | 2.23 |
| C2CD5    | S284  | Hyper | 3.48  | 2.38 | 1.77 | 3.46 | 1.71 |
| C2CD5    | S662  | Hyper | 4.79  | 2.06 | 2.00 | 2.20 | 2.11 |
| GTF3C1   | S1068 | Hyper | 8.16  | 2.31 | 2.23 | 1.91 | 2.81 |
| GTF3C1   | T1873 | Hyper | 19.79 | 2.48 | 3.10 | 3.30 | 2.33 |
| SLC35B2  | S422  | Hyper | 6.11  | 2.24 | 3.31 | 2.16 | 2.32 |
| PHRF1    | S1360 | Hyper | 9.34  | 2.16 | 2.43 | 2.60 | 2.55 |
| PHRF1    | S1371 | Hyper | 6.62  | 2.24 | 2.46 | 2.60 | 3.42 |
| PHRF1    | S991  | Hyper | 7.60  | 1.80 | 2.46 | 3.49 | 1.72 |
| FARP1    | S920  | Hyper | 5.65  | 1.72 | 2.06 | 1.82 | 3.75 |
| NUP35    | S262  | Hyper | 4.71  | 2.86 | 6.51 | 2.29 | 2.07 |
| NUP35    | T291  | Hyper | 10.45 | 1.87 | 3.94 | 4.84 | 1.64 |
| CYFIP1   | T1234 | Hyper | 4.44  | 1.90 | 1.97 | 2.92 | 2.52 |
| TEX2     | S790  | Hyper | 6.54  | 1.77 | 1.59 | 2.29 | 2.16 |
| KLC4     | T162  | Hyper | 6.33  | 3.03 | 2.11 | 7.44 | 2.03 |
| EI24     | S304  | Hyper | 13.10 | 2.17 | 3.03 | 2.22 | 2.15 |
| DOCK1    | T1793 | Hyper | 2.15  | 1.57 | 1.79 | 2.88 | 1.57 |
| PHF3     | S1045 | Hyper | 8.23  | 2.10 | 2.34 | 1.79 | 1.61 |
| HSH2D    | S137  | Hyper | 8.03  | 2.07 | 3.08 | 2.18 | 3.12 |
| KDM6A    | T879  | Hyper | 5.90  | 2.31 | 2.36 | 2.53 | 2.06 |
| AKAP8L   | S222  | Hyper | 8.74  | 2.40 | 2.30 | 2.33 | 1.73 |
| NOP14    | S148  | Hyper | 5.60  | 2.27 | 2.29 | 1.56 | 2.12 |
| CLK2     | S50   | Hyper | 8.63  | 2.38 | 3.72 | 2.95 | 2.25 |
| ZC3H18   | S67   | Hyper | 11.42 | 2.02 | 2.32 | 2.46 | 2.60 |
| ZC3H18   | S74   | Hyper | 10.98 | 2.35 | 2.25 | 2.06 | 3.44 |
| CHD4     | S1524 | Hyper | 7.12  | 2.21 | 2.43 | 1.87 | 1.88 |
| CHD4     | S1569 | Hyper | 17.95 | 2.61 | 2.66 | 3.02 | 1.76 |
| CHD4     | T1542 | Hyper | 6.34  | 1.67 | 2.16 | 1.75 | 2.27 |
| CHD4     | T1546 | Hyper | 8.01  | 1.72 | 2.97 | 2.19 | 2.27 |
| RPRD2    | S902  | Hyper | 12.93 | 1.62 | 2.53 | 4.09 | 2.47 |
| BAZ2A    | S1768 | Hyper | 10.93 | 2.38 | 2.33 | 4.41 | 3.80 |
| GATAD2A  | S100  | Hyper | 4.33  | 1.76 | 2.09 | 2.37 | 2.06 |

|         |       |       |       |      |      |      |       |
|---------|-------|-------|-------|------|------|------|-------|
| BCLAF1  | S194  | Hyper | 6.05  | 3.03 | 2.82 | 2.72 | 2.41  |
| BCLAF1  | S196  | Hyper | 7.22  | 1.70 | 2.89 | 3.22 | 1.70  |
| BCLAF1  | S266  | Hyper | 9.83  | 2.67 | 3.36 | 3.07 | 2.65  |
| BCLAF1  | S288  | Hyper | 6.18  | 2.00 | 2.23 | 2.98 | 2.24  |
| BCLAF1  | S387  | Hyper | 11.08 | 1.92 | 2.31 | 2.93 | 3.13  |
| BCLAF1  | S395  | Hyper | 6.60  | 2.37 | 2.56 | 2.21 | 1.65  |
| BCLAF1  | S494  | Hyper | 6.04  | 2.17 | 2.46 | 2.48 | 1.70  |
| BCLAF1  | S510  | Hyper | 6.30  | 2.28 | 2.39 | 3.01 | 1.67  |
| BCLAF1  | S758  | Hyper | 4.44  | 2.33 | 3.42 | 2.97 | 2.96  |
| BCLAF1  | T400  | Hyper | 8.81  | 2.58 | 2.58 | 2.47 | 1.73  |
| BCLAF1  | T403  | Hyper | 10.08 | 2.51 | 2.85 | 2.37 | 1.65  |
| WDR75   | S715  | Hyper | 7.56  | 2.89 | 3.54 | 3.31 | 1.94  |
| WDR75   | S718  | Hyper | 7.56  | 3.09 | 4.75 | 3.31 | 1.90  |
| WDR75   | S732  | Hyper | 10.52 | 3.45 | 3.01 | 4.45 | 13.44 |
| TUBA1C  | S118  | Hyper | 10.57 | 2.49 | 4.71 | 3.94 | 6.42  |
| HEXIM2  | T54   | Hyper | 7.67  | 1.67 | 2.46 | 2.07 | 2.21  |
| SRRM1   | S260  | Hyper | 6.77  | 1.99 | 2.15 | 1.96 | 1.62  |
| SRRM1   | S391  | Hyper | 5.51  | 2.02 | 1.97 | 4.69 | 2.73  |
| SRRM1   | S393  | Hyper | 5.51  | 2.18 | 2.17 | 5.09 | 2.48  |
| SRRM1   | S463  | Hyper | 7.44  | 2.08 | 2.00 | 3.76 | 1.91  |
| SRRM1   | S609  | Hyper | 4.72  | 1.76 | 3.58 | 2.53 | 2.45  |
| SRRM1   | S617  | Hyper | 2.11  | 1.84 | 3.48 | 2.88 | 1.94  |
| SRRM1   | S628  | Hyper | 6.22  | 1.72 | 2.20 | 1.84 | 2.01  |
| SRRM1   | S650  | Hyper | 9.09  | 2.18 | 2.46 | 2.59 | 2.10  |
| SRRM1   | S750  | Hyper | 9.65  | 2.12 | 2.33 | 2.09 | 1.88  |
| SRRM1   | S752  | Hyper | 5.06  | 2.21 | 2.22 | 2.08 | 1.98  |
| SRRM1   | S768  | Hyper | 8.43  | 2.02 | 3.28 | 2.23 | 2.38  |
| SRRM1   | S781  | Hyper | 6.58  | 1.92 | 2.63 | 2.12 | 5.02  |
| SRRM1   | S787  | Hyper | 6.48  | 1.83 | 2.02 | 2.12 | 5.20  |
| SRRM1   | S809  | Hyper | 4.85  | 3.11 | 2.30 | 3.05 | 2.30  |
| SRRM1   | S886  | Hyper | 6.55  | 2.34 | 2.42 | 2.89 | 1.80  |
| SRRM1   | T220  | Hyper | 6.59  | 2.03 | 2.33 | 2.63 | 1.69  |
| SRRM1   | T416  | Hyper | 18.11 | 3.08 | 4.35 | 8.20 | 1.89  |
| SRRM1   | T584  | Hyper | 8.79  | 2.68 | 2.70 | 2.42 | 3.65  |
| SRRM1   | T586  | Hyper | 8.79  | 2.58 | 2.49 | 2.47 | 2.35  |
| SRRM1   | T790  | Hyper | 6.13  | 1.93 | 2.02 | 2.12 | 5.38  |
| THUMPD1 | S88   | Hyper | 6.75  | 2.35 | 2.08 | 3.21 | 2.03  |
| ZNF687  | S1057 | Hyper | 7.54  | 2.19 | 2.99 | 4.01 | 1.90  |
| ZNF687  | S1106 | Hyper | 7.75  | 3.33 | 1.78 | 5.23 | 2.11  |
| ZNF687  | S140  | Hyper | 8.22  | 1.80 | 2.68 | 2.86 | 1.93  |
| ZNF687  | S253  | Hyper | 9.99  | 2.38 | 3.36 | 2.20 | 3.02  |
| ZNF687  | S266  | Hyper | 10.52 | 2.18 | 3.81 | 1.92 | 2.61  |
| ZNF687  | S271  | Hyper | 10.52 | 2.24 | 3.81 | 2.80 | 2.85  |

|          |       |       |       |      |      |      |      |
|----------|-------|-------|-------|------|------|------|------|
| ZNF687   | S374  | Hyper | 12.45 | 2.42 | 3.22 | 2.10 | 1.91 |
| ZNF687   | T377  | Hyper | 6.23  | 1.90 | 2.51 | 2.32 | 3.01 |
| ZNF687   | T432  | Hyper | 3.19  | 1.71 | 3.00 | 3.98 | 2.15 |
| BRD1     | S945  | Hyper | 6.95  | 3.93 | 2.93 | 3.36 | 2.57 |
| CIC      | S2306 | Hyper | 5.82  | 1.62 | 1.79 | 3.13 | 1.93 |
| CIC      | S2318 | Hyper | 5.26  | 1.95 | 2.31 | 4.23 | 1.93 |
| CIC      | T2307 | Hyper | 4.69  | 1.77 | 1.86 | 2.47 | 1.93 |
| CIC      | T2317 | Hyper | 10.95 | 1.65 | 2.48 | 2.62 | 1.93 |
| CAD      | S1796 | Hyper | 4.33  | 2.44 | 3.79 | 2.17 | 1.91 |
| TICRR    | S598  | Hyper | 11.15 | 2.53 | 4.94 | 2.49 | 2.55 |
| ARHGAP39 | S407  | Hyper | 7.89  | 2.09 | 2.59 | 2.94 | 1.87 |
| DOK3     | S308  | Hyper | 9.25  | 1.74 | 1.98 | 2.53 | 1.75 |
| MAP1S    | S449  | Hyper | 3.28  | 1.96 | 1.78 | 3.44 | 1.65 |
| MAP1S    | S737  | Hyper | 3.83  | 1.72 | 1.80 | 1.95 | 4.82 |
| PCYT1A   | S323  | Hyper | 4.10  | 2.51 | 3.58 | 1.87 | 3.91 |
| KDM5B    | S1492 | Hyper | 9.04  | 1.68 | 6.39 | 3.39 | 1.85 |
| CLIC6    | S303  | Hyper | 5.08  | 2.04 | 2.45 | 3.33 | 1.75 |
| XRN2     | S526  | Hyper | 22.48 | 2.72 | 2.35 | 2.20 | 2.02 |
| XRN2     | S577  | Hyper | 5.89  | 2.52 | 2.79 | 1.73 | 1.94 |
| XRN2     | S579  | Hyper | 6.67  | 2.74 | 2.44 | 2.70 | 2.12 |
| HNRNPK   | S284  | Hyper | 4.88  | 1.81 | 2.34 | 2.49 | 1.69 |
| DNMT1    | S143  | Hyper | 7.51  | 2.87 | 2.78 | 2.74 | 2.76 |
| DNMT1    | S154  | Hyper | 16.19 | 2.91 | 2.78 | 4.94 | 3.91 |
| DNMT1    | S714  | Hyper | 9.63  | 2.46 | 4.11 | 2.83 | 2.70 |
| NFX1     | S150  | Hyper | 9.46  | 1.74 | 1.97 | 2.59 | 2.76 |
| EIF2A    | S481  | Hyper | 7.66  | 2.59 | 3.31 | 3.81 | 2.24 |
| HMGA1    | S36   | Hyper | 6.23  | 2.44 | 2.23 | 3.70 | 2.34 |
| HMGA1    | S44   | Hyper | 5.49  | 4.24 | 2.66 | 2.55 | 1.97 |
| HMGA1    | T39   | Hyper | 6.39  | 3.23 | 2.49 | 1.95 | 2.53 |
| HMGA1    | T53   | Hyper | 8.06  | 3.73 | 5.58 | 3.27 | 2.78 |
| ZC3H11A  | S171  | Hyper | 8.60  | 1.95 | 2.69 | 4.17 | 2.06 |
| ZC3H11A  | S758  | Hyper | 4.37  | 3.42 | 2.67 | 1.89 | 1.76 |
| ZC3H11A  | S759  | Hyper | 5.27  | 2.43 | 2.67 | 3.51 | 1.76 |
| NUP88    | S517  | Hyper | 10.14 | 2.61 | 4.23 | 2.71 | 2.55 |
| CDK1     | T161  | Hyper | 12.53 | 1.73 | 5.53 | 2.33 | 2.02 |
| GPS1     | S536  | Hyper | 3.01  | 1.94 | 2.80 | 4.55 | 2.02 |
| GPS1     | S551  | Hyper | 7.89  | 2.08 | 1.90 | 4.50 | 2.04 |
| GPS1     | T547  | Hyper | 7.89  | 1.82 | 2.18 | 1.75 | 1.98 |
| SLC4A7   | S288  | Hyper | 8.73  | 2.02 | 2.53 | 5.32 | 2.70 |
| SLC4A7   | S292  | Hyper | 4.55  | 2.17 | 4.50 | 3.35 | 2.44 |
| THRAP3   | S243  | Hyper | 3.25  | 2.15 | 2.36 | 1.84 | 1.80 |
| THRAP3   | S248  | Hyper | 5.26  | 2.13 | 2.77 | 3.01 | 1.66 |
| THRAP3   | S253  | Hyper | 5.39  | 2.34 | 1.89 | 3.07 | 1.66 |

|          |       |       |       |      |      |      |      |
|----------|-------|-------|-------|------|------|------|------|
| THRAP3   | S315  | Hyper | 6.96  | 1.95 | 2.20 | 2.27 | 5.02 |
| THRAP3   | S320  | Hyper | 6.96  | 1.84 | 2.29 | 1.96 | 5.02 |
| NCOA2    | S29   | Hyper | 5.62  | 1.89 | 2.13 | 2.19 | 1.63 |
| AHCTF1   | S1222 | Hyper | 7.34  | 2.24 | 3.16 | 2.39 | 1.95 |
| ADAT1    | S42   | Hyper | 4.28  | 2.62 | 3.45 | 2.72 | 2.07 |
| WASHC2C  | S158  | Hyper | 4.86  | 1.73 | 1.64 | 3.96 | 1.73 |
| TIMELESS | S1120 | Hyper | 5.08  | 2.41 | 1.78 | 1.68 | 2.35 |
| TIMELESS | S1148 | Hyper | 5.33  | 2.52 | 4.51 | 4.60 | 1.91 |
| HELZ     | S1318 | Hyper | 13.03 | 1.93 | 2.95 | 3.47 | 1.94 |
| HELZ     | T1164 | Hyper | 5.77  | 1.61 | 1.75 | 2.54 | 2.02 |
| SNX27    | S51   | Hyper | 3.82  | 2.43 | 2.57 | 1.87 | 1.86 |
| CCDC97   | S192  | Hyper | 4.56  | 1.58 | 2.33 | 4.62 | 1.85 |
| CTR9     | S1063 | Hyper | 12.38 | 1.96 | 3.25 | 5.50 | 2.19 |
| CTR9     | S917  | Hyper | 27.47 | 2.62 | 5.39 | 2.21 | 4.70 |
| CTR9     | T951  | Hyper | 7.38  | 2.23 | 2.46 | 2.60 | 2.16 |
| PPP1R35  | S52   | Hyper | 4.29  | 1.72 | 1.89 | 3.87 | 1.86 |
| FRA10AC1 | S278  | Hyper | 5.69  | 2.17 | 1.76 | 2.15 | 1.90 |
| SETD2    | S570  | Hyper | 11.65 | 1.87 | 1.87 | 2.92 | 3.10 |
| PBRM1    | S522  | Hyper | 5.12  | 1.99 | 2.49 | 3.39 | 2.14 |
| PBRM1    | S526  | Hyper | 5.12  | 1.57 | 2.13 | 2.31 | 1.73 |
| YEATS2   | S627  | Hyper | 6.06  | 1.89 | 2.68 | 3.44 | 2.20 |
| SETX     | S1663 | Hyper | 4.88  | 1.90 | 2.29 | 2.08 | 1.92 |
| TRAPPC10 | S736  | Hyper | 11.43 | 2.41 | 2.87 | 2.95 | 1.82 |
| ELAVL1   | S202  | Hyper | 6.24  | 1.64 | 2.23 | 2.71 | 1.83 |
| HDAC2    | S422  | Hyper | 5.80  | 2.13 | 2.51 | 2.09 | 2.85 |
| EIF3E    | S399  | Hyper | 6.20  | 1.87 | 3.12 | 2.36 | 2.12 |
| ARVCF    | S343  | Hyper | 3.43  | 2.61 | 2.24 | 2.21 | 2.42 |
| ATP2B1   | S1182 | Hyper | 7.29  | 1.81 | 2.00 | 9.28 | 2.13 |
| CAV1     | S37   | Hypo  | 0.46  | 0.39 | 0.15 | 0.09 | 0.21 |
| CAV1     | Y42   | Hypo  | 0.50  | 0.49 | 0.36 | 0.26 | 0.24 |
| DES      | S28   | Hypo  | 0.39  | 0.48 | 0.25 | 0.26 | 0.50 |
| DES      | S32   | Hypo  | 0.34  | 0.34 | 0.00 | 0.26 | 0.28 |
| DSG2     | S700  | Hyper | 9.59  | 2.33 | 3.75 | 3.32 | 4.70 |
| DSG2     | S701  | Hyper | 14.71 | 2.33 | 7.35 | 4.50 | 3.87 |
| EEF2     | T59   | Hyper | 5.35  | 2.38 | 2.64 | 2.85 | 1.91 |
| ETV6     | S22   | Hyper | 2.31  | 1.84 | 1.64 | 6.91 | 2.22 |
| FKBP3    | S36   | Hyper | 4.33  | 1.74 | 2.85 | 2.52 | 4.36 |
| RBMX     | S208  | Hyper | 5.08  | 2.32 | 3.12 | 2.51 | 1.67 |
| RBMX     | S58   | Hyper | 6.96  | 1.79 | 2.52 | 2.08 | 1.73 |
| HSPA4    | S647  | Hyper | 12.13 | 1.79 | 1.94 | 2.98 | 1.82 |
| HSPD1    | S70   | Hyper | 7.36  | 3.22 | 3.63 | 1.95 | 1.86 |
| ITPR3    | S2670 | Hyper | 3.05  | 1.94 | 1.66 | 2.38 | 1.87 |
| KRT19    | S14   | Hyper | 4.65  | 1.57 | 2.55 | 2.73 | 1.96 |

|         |       |       |       |      |      |        |      |
|---------|-------|-------|-------|------|------|--------|------|
| LIG3    | S210  | Hyper | 7.38  | 2.22 | 2.77 | 2.84   | 2.00 |
| LSP1    | S177  | Hyper | 7.28  | 1.68 | 1.97 | 2.53   | 2.13 |
| LSP1    | S188  | Hyper | 8.93  | 1.75 | 2.00 | 2.53   | 2.04 |
| LSP1    | S189  | Hyper | 9.40  | 1.82 | 2.59 | 2.12   | 1.84 |
| LSP1    | T175  | Hyper | 5.30  | 1.83 | 1.76 | 253.06 | 1.94 |
| MARCKS  | S145  | Hyper | 8.47  | 2.08 | 2.63 | 2.50   | 2.30 |
| MARCKS  | T150  | Hyper | 8.02  | 2.08 | 2.08 | 2.11   | 1.85 |
| MKI67   | S1131 | Hyper | 6.91  | 3.76 | 3.46 | 2.60   | 2.42 |
| MKI67   | S2223 | Hyper | 12.63 | 2.88 | 3.74 | 3.54   | 2.15 |
| MKI67   | S357  | Hyper | 33.29 | 3.02 | 6.39 | 3.24   | 2.79 |
| MKI67   | S374  | Hyper | 12.51 | 1.82 | 4.84 | 5.52   | 3.69 |
| MKI67   | T1923 | Hyper | 5.43  | 2.21 | 5.69 | 2.71   | 2.41 |
| OSBP    | S198  | Hyper | 5.58  | 1.96 | 1.87 | 2.34   | 2.25 |
| OSBP    | S382  | Hyper | 3.30  | 1.97 | 2.36 | 1.66   | 3.63 |
| OSBP    | S386  | Hyper | 6.26  | 1.94 | 3.19 | 2.15   | 1.87 |
| OSBP    | S389  | Hyper | 6.48  | 2.40 | 3.07 | 2.50   | 2.13 |
| PGAM1   | S31   | Hyper | 4.31  | 2.17 | 3.98 | 2.70   | 2.22 |
| PTBP1   | S459  | Hyper | 5.20  | 2.65 | 3.21 | 2.12   | 2.69 |
| RBBP8   | S163  | Hyper | 2.82  | 1.74 | 2.29 | 8.65   | 1.86 |
| SGTA    | T81   | Hyper | 6.10  | 2.17 | 2.02 | 2.01   | 2.38 |
| SLC9A1  | S605  | Hyper | 2.83  | 1.67 | 2.00 | 2.41   | 2.85 |
| SMARCC1 | S310  | Hyper | 4.42  | 2.60 | 3.42 | 4.18   | 2.39 |
| SNRNP70 | S226  | Hyper | 13.54 | 2.28 | 2.85 | 4.18   | 1.81 |
| SP100   | S231  | Hyper | 8.80  | 2.48 | 2.12 | 6.38   | 2.06 |
| SP100   | S409  | Hyper | 5.94  | 2.36 | 3.43 | 2.17   | 1.84 |
| SP100   | S453  | Hyper | 4.51  | 1.75 | 2.57 | 2.97   | 1.72 |
| SPAG1   | S418  | Hyper | 6.38  | 3.11 | 5.06 | 2.33   | 3.50 |
| SRPK1   | S311  | Hyper | 8.96  | 2.55 | 4.04 | 3.50   | 2.89 |
| SSRP1   | S444  | Hyper | 8.31  | 2.24 | 2.55 | 5.28   | 1.52 |
| SSRP1   | Y438  | Hyper | 6.50  | 2.35 | 1.82 | 5.31   | 1.52 |
| SEC62   | S315  | Hyper | 19.51 | 2.33 | 2.65 | 2.48   | 1.66 |
| TPR     | S1676 | Hyper | 9.48  | 2.99 | 6.63 | 4.37   | 2.30 |
| VDAC1   | S104  | Hyper | 6.46  | 3.20 | 3.57 | 2.58   | 3.29 |
| CLIP2   | S207  | Hyper | 10.31 | 1.71 | 1.60 | 3.19   | 2.20 |
| WEE1    | S165  | Hyper | 10.87 | 2.52 | 3.60 | 3.28   | 2.33 |
| KMT2D   | S3130 | Hyper | 8.31  | 1.83 | 2.35 | 2.60   | 1.72 |
| AXIN1   | S486  | Hyper | 9.65  | 1.93 | 2.76 | 4.18   | 6.52 |
| AXIN1   | S493  | Hyper | 8.14  | 2.10 | 2.76 | 5.84   | 4.30 |
| YBX3    | S203  | Hyper | 3.84  | 1.64 | 3.66 | 3.44   | 2.69 |
| YBX3    | S204  | Hyper | 3.26  | 1.64 | 3.21 | 4.25   | 2.69 |
| DENR    | S73   | Hyper | 6.85  | 2.38 | 4.05 | 1.92   | 2.33 |
| TRIM24  | S710  | Hyper | 5.42  | 2.19 | 2.40 | 3.13   | 2.96 |
| TRIM24  | S777  | Hyper | 8.34  | 2.91 | 2.62 | 3.34   | 1.80 |

|          |       |       |       |      |      |       |      |
|----------|-------|-------|-------|------|------|-------|------|
| TRIM24   | S991  | Hyper | 9.89  | 2.46 | 2.56 | 3.45  | 2.66 |
| TRIM24   | S994  | Hyper | 11.79 | 3.02 | 2.67 | 2.90  | 2.98 |
| SQSTM1   | S152  | Hyper | 5.33  | 1.79 | 3.95 | 2.59  | 2.11 |
| SQSTM1   | S24   | Hyper | 3.55  | 2.12 | 2.05 | 2.20  | 1.75 |
| SQSTM1   | S272  | Hyper | 6.07  | 2.49 | 3.97 | 2.28  | 2.17 |
| PRPF4B   | S144  | Hyper | 4.73  | 1.95 | 2.18 | 3.00  | 2.50 |
| PRPF4B   | S20   | Hyper | 12.47 | 2.21 | 2.66 | 2.17  | 1.85 |
| PRPF4B   | S23   | Hyper | 11.86 | 2.27 | 2.88 | 2.30  | 1.80 |
| PRPF4B   | S437  | Hyper | 2.86  | 2.01 | 2.51 | 4.01  | 2.47 |
| ST13     | S75   | Hyper | 2.54  | 2.46 | 2.50 | 14.73 | 1.76 |
| UBE2M    | S28   | Hyper | 10.94 | 3.86 | 2.76 | 2.21  | 2.77 |
| EIF4EBP1 | T70   | Hyper | 3.11  | 1.78 | 1.74 | 5.81  | 2.24 |
| TARBP2   | S131  | Hyper | 5.75  | 1.99 | 4.03 | 1.90  | 3.47 |
| ARHGAP1  | S51   | Hyper | 5.40  | 2.46 | 1.97 | 1.89  | 1.66 |
| ASPH     | S22   | Hyper | 4.35  | 3.16 | 3.39 | 3.90  | 3.47 |
| DAP      | S51   | Hyper | 5.67  | 2.01 | 2.88 | 2.95  | 1.72 |
| DSP      | S178  | Hyper | 4.76  | 1.98 | 3.94 | 1.76  | 2.54 |
| DSP      | S2820 | Hyper | 6.73  | 1.72 | 3.53 | 1.96  | 2.91 |
| DSP      | S2821 | Hyper | 6.66  | 1.72 | 2.47 | 2.48  | 2.17 |
| DSP      | S2825 | Hyper | 6.78  | 1.81 | 2.29 | 2.36  | 2.91 |
| BPTF     | S1231 | Hyper | 3.13  | 1.99 | 3.02 | 2.14  | 1.96 |
| BPTF     | S2370 | Hyper | 8.28  | 1.99 | 2.39 | 2.62  | 1.78 |
| BPTF     | S572  | Hyper | 10.69 | 1.76 | 2.26 | 2.85  | 2.61 |
| GOLGA2   | S66   | Hyper | 7.54  | 2.85 | 7.36 | 8.56  | 2.32 |
| MCM2     | S139  | Hyper | 6.95  | 2.69 | 5.32 | 2.64  | 2.06 |
| YBX1     | S165  | Hyper | 6.46  | 2.22 | 2.58 | 2.40  | 2.76 |
| YBX1     | S174  | Hyper | 6.46  | 2.06 | 4.11 | 2.40  | 1.70 |
| TRA2B    | S264  | Hyper | 3.27  | 3.47 | 2.71 | 3.56  | 1.95 |
| TRA2B    | S266  | Hyper | 5.32  | 3.70 | 2.63 | 2.22  | 3.07 |
| PRRC2A   | S1089 | Hyper | 6.77  | 2.73 | 2.74 | 2.11  | 2.82 |
| PRRC2A   | S1092 | Hyper | 13.00 | 2.93 | 4.46 | 1.81  | 2.27 |
| PRRC2A   | S350  | Hyper | 3.75  | 1.99 | 2.52 | 2.69  | 2.41 |
| PRRC2A   | S380  | Hyper | 8.28  | 2.23 | 2.61 | 2.67  | 1.74 |
| PRRC2A   | T610  | Hyper | 6.63  | 1.66 | 2.87 | 2.12  | 1.91 |
| CAVIN2   | S293  | Hypo  | 0.23  | 0.26 | 0.29 | 0.40  | 0.21 |
| PRPF3    | S619  | Hyper | 9.02  | 2.53 | 3.37 | 2.16  | 1.81 |
| SCAF11   | S413  | Hyper | 5.46  | 1.73 | 2.49 | 1.67  | 1.73 |
| SCAF11   | S776  | Hyper | 5.84  | 1.98 | 2.42 | 3.64  | 1.88 |
| DDX21    | S121  | Hyper | 2.77  | 4.98 | 4.56 | 5.28  | 3.19 |
| DDX21    | S173  | Hyper | 9.94  | 3.19 | 3.48 | 4.99  | 3.13 |
| DLG5     | S1000 | Hyper | 8.83  | 1.72 | 2.80 | 2.26  | 1.83 |
| MED1     | S1401 | Hyper | 11.00 | 2.24 | 2.47 | 3.99  | 2.16 |
| PPIG     | S696  | Hyper | 4.63  | 1.94 | 4.18 | 3.13  | 2.77 |

|         |       |       |       |      |      |      |      |
|---------|-------|-------|-------|------|------|------|------|
| PPIG    | S745  | Hyper | 8.50  | 1.96 | 2.48 | 2.24 | 2.48 |
| SYMPK   | S1243 | Hyper | 18.71 | 1.82 | 3.02 | 2.57 | 2.64 |
| SYMPK   | S1259 | Hyper | 12.83 | 2.04 | 2.65 | 2.92 | 2.64 |
| HDAC1   | S421  | Hyper | 6.40  | 1.96 | 2.84 | 2.23 | 2.77 |
| HDAC1   | S423  | Hyper | 8.60  | 2.77 | 2.07 | 2.86 | 4.12 |
| ABCC1   | S930  | Hyper | 9.14  | 2.87 | 3.49 | 2.48 | 1.83 |
| TRIM25  | S100  | Hyper | 5.57  | 1.74 | 2.60 | 2.89 | 2.18 |
| ZRSR2   | S384  | Hyper | 7.88  | 2.65 | 2.05 | 2.25 | 1.70 |
| AKAP12  | S286  | Hypo  | 0.23  | 0.29 | 0.40 | 0.28 | 0.15 |
| AKAP12  | S290  | Hypo  | 0.30  | 0.56 | 0.23 | 0.30 | 0.39 |
| MED12   | S635  | Hyper | 11.23 | 2.23 | 2.44 | 2.29 | 1.64 |
| BCL3    | S374  | Hyper | 6.53  | 2.17 | 4.06 | 3.24 | 3.58 |
| CTTN    | S418  | Hyper | 5.48  | 2.86 | 2.23 | 1.62 | 1.89 |
| LMO7    | S1182 | Hyper | 4.63  | 1.78 | 3.52 | 1.73 | 2.77 |
| NCL     | S34   | Hyper | 4.75  | 2.59 | 2.80 | 4.75 | 2.35 |
| NCL     | S41   | Hyper | 6.47  | 2.48 | 2.43 | 4.92 | 2.30 |
| NCL     | S42   | Hyper | 6.39  | 2.48 | 2.37 | 4.57 | 2.30 |
| NCL     | S67   | Hyper | 8.27  | 4.19 | 4.61 | 2.46 | 2.70 |
| NCL     | T76   | Hyper | 6.98  | 2.49 | 4.81 | 4.08 | 2.83 |
| ARHGEF5 | S983  | Hyper | 8.31  | 1.78 | 3.27 | 4.04 | 4.23 |
| CCDC6   | S240  | Hyper | 2.00  | 1.89 | 2.01 | 1.92 | 1.74 |
| CCDC6   | S52   | Hyper | 6.18  | 3.01 | 3.47 | 7.33 | 2.77 |
| ZRANB2  | S307  | Hyper | 9.22  | 2.24 | 2.00 | 1.87 | 2.47 |
| SH2D3A  | S180  | Hyper | 5.53  | 2.20 | 2.85 | 2.33 | 4.81 |
| CFL1    | T25   | Hyper | 6.16  | 2.09 | 2.50 | 2.40 | 1.79 |
| HSF1    | S307  | Hyper | 8.27  | 2.09 | 2.70 | 2.36 | 1.86 |
| LAD1    | S177  | Hyper | 4.19  | 2.33 | 6.06 | 3.72 | 4.14 |
| LAD1    | S64   | Hyper | 4.04  | 1.84 | 3.49 | 2.22 | 2.04 |
| LMNB1   | S393  | Hyper | 1.75  | 2.36 | 2.65 | 5.34 | 1.74 |
| TCF20   | S574  | Hyper | 32.06 | 2.39 | 3.59 | 2.38 | 2.09 |
| TCF20   | S640  | Hyper | 8.31  | 2.28 | 2.38 | 2.61 | 2.08 |
| CEBPZ   | S629  | Hyper | 11.57 | 2.81 | 3.65 | 4.85 | 2.53 |
| RBM6    | S1025 | Hyper | 3.99  | 1.72 | 2.03 | 2.85 | 2.06 |
| RBM6    | S891  | Hyper | 10.50 | 2.12 | 2.42 | 3.51 | 1.99 |
| AKAP8   | S328  | Hyper | 9.62  | 2.07 | 2.68 | 1.79 | 1.88 |
| AKAP8   | S339  | Hyper | 7.01  | 3.16 | 2.54 | 4.04 | 2.05 |
| STUB1   | S19   | Hyper | 4.70  | 2.24 | 3.84 | 3.35 | 1.78 |
| STUB1   | S23   | Hyper | 5.09  | 2.65 | 2.94 | 3.35 | 1.78 |
| MCM4    | S120  | Hyper | 15.79 | 2.63 | 4.46 | 2.64 | 3.71 |
| MCM6    | S762  | Hyper | 7.58  | 2.55 | 4.83 | 1.83 | 2.00 |
| MLLT1   | S475  | Hyper | 5.97  | 2.96 | 2.43 | 4.60 | 1.55 |
| ORC2    | T226  | Hyper | 17.23 | 2.16 | 6.82 | 4.02 | 3.26 |
| PRKAB1  | S96   | Hyper | 5.44  | 1.95 | 2.25 | 1.80 | 2.64 |



|         |       |       |       |      |      |      |      |
|---------|-------|-------|-------|------|------|------|------|
| RANBP2  | S781  | Hyper | 9.11  | 2.93 | 3.31 | 2.74 | 4.15 |
| RANBP2  | T1396 | Hyper | 7.28  | 1.90 | 3.39 | 2.92 | 3.03 |
| RANBP2  | T2153 | Hyper | 6.67  | 2.41 | 3.69 | 3.09 | 2.39 |
| RANBP2  | T799  | Hyper | 9.71  | 2.86 | 4.36 | 3.18 | 3.13 |
| SRSF6   | S303  | Hyper | 7.68  | 1.88 | 2.42 | 2.00 | 1.87 |
| XRCC1   | S241  | Hyper | 8.96  | 3.23 | 8.26 | 5.45 | 3.30 |
| XRCC1   | S447  | Hyper | 7.62  | 2.36 | 3.44 | 3.67 | 1.81 |
| XRCC1   | T453  | Hyper | 8.43  | 2.36 | 3.25 | 3.35 | 3.65 |
| PGRMC2  | T235  | Hyper | 3.67  | 1.69 | 1.72 | 1.73 | 2.11 |
| TACC3   | S434  | Hyper | 16.26 | 1.87 | 3.75 | 2.02 | 1.85 |
| NOP56   | S519  | Hyper | 5.74  | 2.72 | 2.32 | 2.08 | 1.93 |
| ANP32B  | T15   | Hyper | 7.43  | 2.47 | 2.45 | 4.35 | 2.02 |
| ARFGEF1 | S52   | Hyper | 7.46  | 2.21 | 3.20 | 4.64 | 2.72 |
| RGS14   | S288  | Hyper | 4.35  | 2.65 | 1.68 | 1.95 | 1.79 |
| SLC12A7 | T973  | Hyper | 4.38  | 1.52 | 1.99 | 1.93 | 1.95 |
| NUDC    | S139  | Hyper | 11.25 | 3.08 | 3.36 | 2.08 | 1.94 |
| NUDC    | T145  | Hyper | 6.17  | 2.91 | 3.18 | 3.89 | 1.92 |
| KIF1C   | S676  | Hyper | 7.75  | 1.68 | 2.20 | 1.85 | 2.34 |
| SRCAP   | S2430 | Hyper | 11.71 | 1.93 | 3.05 | 3.09 | 3.28 |
| SRCAP   | S2869 | Hyper | 1.96  | 2.28 | 3.33 | 4.61 | 1.92 |
| SUB1    | S118  | Hyper | 5.39  | 1.84 | 2.85 | 1.92 | 1.66 |
| SUB1    | S15   | Hyper | 4.49  | 2.51 | 3.33 | 2.53 | 2.51 |
| SUB1    | S19   | Hyper | 7.11  | 3.23 | 3.44 | 1.80 | 2.07 |
| AKAP13  | S1686 | Hyper | 2.48  | 1.87 | 2.71 | 9.36 | 2.81 |
| AKAP13  | S983  | Hyper | 6.72  | 1.91 | 3.49 | 1.84 | 1.71 |
| AKAP13  | T953  | Hyper | 4.39  | 1.93 | 2.10 | 2.84 | 1.66 |
| SF3B2   | S309  | Hyper | 6.74  | 2.34 | 2.68 | 1.94 | 2.89 |
| SF3B2   | S347  | Hyper | 20.58 | 2.58 | 3.50 | 2.79 | 2.16 |
| SF3B2   | T311  | Hyper | 5.95  | 2.34 | 3.03 | 3.90 | 2.89 |
| ZFHX3   | S2230 | Hyper | 6.33  | 1.88 | 1.87 | 2.54 | 1.69 |
| TMEM115 | T329  | Hyper | 9.99  | 2.15 | 3.85 | 3.20 | 2.29 |
| KATNA1  | S170  | Hyper | 5.21  | 2.17 | 1.88 | 1.96 | 1.84 |
| DDX20   | T705  | Hyper | 5.42  | 2.29 | 3.00 | 1.81 | 1.80 |
| SEC63   | T537  | Hyper | 9.00  | 2.50 | 2.59 | 3.13 | 2.75 |
| PNKP    | S114  | Hyper | 3.75  | 4.16 | 1.73 | 2.03 | 1.93 |
| CBX3    | S97   | Hyper | 2.51  | 2.40 | 2.80 | 3.33 | 2.23 |
| OGFR    | S378  | Hyper | 4.60  | 2.16 | 2.27 | 2.48 | 1.70 |
| DDX42   | S185  | Hyper | 6.12  | 2.10 | 2.53 | 2.25 | 1.59 |
| DDX42   | Y183  | Hyper | 7.37  | 1.96 | 2.59 | 3.21 | 2.23 |
| CD2AP   | S510  | Hyper | 11.03 | 2.47 | 3.84 | 2.61 | 3.87 |
| CD2AP   | S514  | Hyper | 10.53 | 2.67 | 4.89 | 2.49 | 2.99 |
| CD2AP   | T512  | Hyper | 8.73  | 2.85 | 4.92 | 4.51 | 3.31 |
| AATF    | S321  | Hyper | 5.25  | 2.65 | 3.48 | 2.15 | 2.75 |

|         |       |       |       |      |       |      |      |
|---------|-------|-------|-------|------|-------|------|------|
| RABGAP1 | S56   | Hyper | 6.11  | 1.90 | 2.36  | 4.79 | 3.15 |
| CAVIN1  | S171  | Hypo  | 0.17  | 0.18 | 0.18  | 0.10 | 0.32 |
| KDM2A   | S718  | Hyper | 4.65  | 1.64 | 2.14  | 2.17 | 2.25 |
| SF3B1   | S488  | Hyper | 8.66  | 2.78 | 2.92  | 2.35 | 1.96 |
| SF3B1   | T350  | Hyper | 6.39  | 2.18 | 1.93  | 2.12 | 2.01 |
| PSD4    | S134  | Hyper | 6.57  | 1.81 | 1.97  | 2.59 | 3.08 |
| PSD4    | S143  | Hyper | 6.93  | 1.97 | 2.19  | 2.61 | 2.70 |
| VPS4A   | S95   | Hyper | 4.06  | 1.66 | 2.09  | 1.98 | 2.15 |
| VPS4A   | S97   | Hyper | 4.18  | 1.90 | 2.09  | 2.82 | 1.77 |
| VPS4A   | S99   | Hyper | 4.18  | 1.74 | 2.13  | 4.39 | 2.37 |
| TRA2A   | S260  | Hyper | 3.27  | 3.47 | 2.71  | 3.56 | 1.95 |
| TRA2A   | S262  | Hyper | 5.32  | 3.70 | 2.63  | 2.22 | 3.07 |
| PRRC2B  | S563  | Hyper | 4.68  | 1.84 | 2.13  | 1.66 | 2.51 |
| PAXBP1  | S262  | Hyper | 4.89  | 2.37 | 2.60  | 4.81 | 1.80 |
| ANAPC2  | S314  | Hyper | 5.48  | 1.86 | 2.80  | 2.06 | 2.91 |
| BAZ1A   | T731  | Hyper | 10.06 | 1.95 | 2.48  | 2.70 | 2.06 |
| NOB1    | S201  | Hyper | 8.36  | 2.97 | 2.59  | 2.11 | 2.08 |
| ATAD2   | S342  | Hyper | 16.94 | 4.08 | 15.55 | 3.25 | 4.04 |
| ZC3H7A  | S738  | Hyper | 4.75  | 2.11 | 1.75  | 2.22 | 2.84 |
| AP2A1   | T653  | Hyper | 4.14  | 1.67 | 1.82  | 2.42 | 1.88 |
| CELSR1  | S2761 | Hyper | 11.46 | 2.14 | 1.96  | 2.89 | 2.08 |
| CELSR1  | S2764 | Hyper | 9.57  | 2.14 | 1.70  | 2.89 | 2.49 |
| CELSR1  | S2867 | Hyper | 5.88  | 2.78 | 1.86  | 2.28 | 2.67 |
| ZNF318  | S1856 | Hyper | 11.49 | 2.28 | 2.74  | 3.15 | 1.81 |
| PELP1   | S531  | Hyper | 10.30 | 2.55 | 2.73  | 3.71 | 1.95 |
| ERO1A   | S106  | Hyper | 4.93  | 2.15 | 4.75  | 2.27 | 2.30 |
| DNTTIP2 | S117  | Hyper | 3.31  | 1.70 | 2.57  | 2.80 | 1.74 |
| DNTTIP2 | T232  | Hyper | 3.80  | 2.25 | 2.45  | 2.18 | 2.23 |
| MAGED2  | S191  | Hyper | 7.34  | 2.10 | 2.48  | 2.37 | 2.49 |
| MAGED2  | S194  | Hyper | 7.33  | 2.34 | 2.20  | 2.27 | 2.23 |
| MDC1    | S498  | Hyper | 9.18  | 2.31 | 2.34  | 2.40 | 2.26 |
| PHF14   | T287  | Hyper | 7.21  | 2.04 | 2.88  | 1.75 | 2.95 |
| SETD1A  | S464  | Hyper | 6.22  | 2.35 | 3.80  | 5.79 | 2.29 |
| KMT2B   | S2288 | Hyper | 4.70  | 1.91 | 5.71  | 2.91 | 2.01 |
| KMT2B   | T2083 | Hyper | 5.28  | 1.82 | 2.08  | 2.14 | 1.90 |
| PDAP1   | S63   | Hyper | 2.60  | 1.75 | 2.70  | 2.71 | 2.06 |
| SPEN    | S1380 | Hyper | 2.88  | 2.01 | 2.27  | 3.46 | 1.69 |
| SPEN    | S1918 | Hyper | 6.97  | 2.07 | 4.13  | 4.11 | 1.72 |
| SPEN    | S727  | Hyper | 6.09  | 2.11 | 2.71  | 1.93 | 1.74 |
| SPEN    | S736  | Hyper | 10.04 | 1.83 | 2.18  | 2.45 | 3.14 |
| CEP170B | S918  | Hyper | 3.66  | 1.73 | 2.13  | 2.06 | 1.60 |
| PDS5B   | S1177 | Hyper | 4.60  | 1.99 | 1.74  | 3.24 | 1.66 |
| PDS5B   | S1182 | Hyper | 4.94  | 1.89 | 1.88  | 4.68 | 1.66 |

|         |       |       |       |      |      |       |      |
|---------|-------|-------|-------|------|------|-------|------|
| ZNF609  | S576  | Hyper | 8.27  | 1.65 | 2.22 | 2.55  | 1.69 |
| TBC1D9B | S432  | Hyper | 3.25  | 2.06 | 1.91 | 5.57  | 2.52 |
| RRP1B   | S736  | Hyper | 2.09  | 2.21 | 1.74 | 2.25  | 2.19 |
| SIPA1L3 | S100  | Hyper | 4.24  | 2.00 | 2.81 | 2.07  | 2.23 |
| RCOR1   | S260  | Hyper | 6.09  | 2.07 | 2.87 | 2.37  | 2.32 |
| RCOR1   | S460  | Hyper | 19.72 | 1.88 | 3.10 | 19.86 | 1.93 |
| ZC3H4   | S1275 | Hyper | 7.11  | 1.91 | 2.44 | 2.83  | 1.82 |
| PRRC2C  | S924  | Hyper | 15.11 | 1.97 | 4.25 | 2.51  | 2.33 |
| FKBP15  | S1195 | Hyper | 9.62  | 1.73 | 2.91 | 1.81  | 2.24 |
| USP24   | S1943 | Hyper | 12.03 | 2.62 | 3.07 | 2.84  | 1.83 |
| LARP1   | S440  | Hyper | 4.03  | 2.07 | 3.02 | 1.90  | 2.11 |
| LARP1   | S471  | Hyper | 4.30  | 2.34 | 2.15 | 2.44  | 1.87 |
| LARP1   | S554  | Hyper | 4.08  | 1.94 | 2.83 | 2.73  | 2.25 |
| LARP1   | T449  | Hyper | 3.75  | 1.84 | 2.95 | 2.63  | 1.86 |
| SCRIB   | S1306 | Hyper | 5.01  | 1.74 | 2.20 | 2.67  | 2.09 |
| SCRIB   | S1309 | Hyper | 5.59  | 1.78 | 2.20 | 2.67  | 2.09 |
| NIPBL   | S318  | Hyper | 8.22  | 1.89 | 2.11 | 2.04  | 1.60 |
| C2CD2   | S435  | Hyper | 3.34  | 1.83 | 3.26 | 2.64  | 6.80 |
| C2CD2   | S441  | Hyper | 5.31  | 2.69 | 2.90 | 2.49  | 1.97 |
| IBTK    | S1045 | Hyper | 7.97  | 1.76 | 2.99 | 3.09  | 1.61 |
| GORASP2 | T415  | Hyper | 8.19  | 1.86 | 3.15 | 1.78  | 2.04 |
| ANKRD17 | S2043 | Hyper | 3.16  | 2.22 | 2.02 | 2.36  | 1.97 |
| ANKRD17 | S2044 | Hyper | 4.26  | 2.03 | 1.94 | 2.16  | 1.96 |
| ANKRD17 | S2046 | Hyper | 4.04  | 2.42 | 1.94 | 2.30  | 1.84 |
| GPATCH4 | S135  | Hyper | 12.30 | 3.10 | 5.43 | 3.50  | 3.02 |
| NOC2L   | S49   | Hyper | 11.96 | 3.57 | 3.23 | 2.60  | 2.12 |
| RSL1D1  | S427  | Hyper | 21.10 | 5.77 | 6.22 | 7.17  | 4.34 |
| EIF5B   | S113  | Hyper | 5.29  | 2.33 | 2.65 | 4.77  | 2.38 |
| EIF5B   | S1168 | Hyper | 4.79  | 1.98 | 3.32 | 2.29  | 2.30 |
| TRIM33  | S862  | Hyper | 6.02  | 2.54 | 3.04 | 2.33  | 1.77 |
| NOP58   | T508  | Hyper | 13.08 | 2.52 | 4.13 | 7.54  | 2.44 |
| NOP58   | T510  | Hyper | 13.80 | 3.29 | 4.09 | 8.56  | 3.31 |
| UTP18   | S121  | Hyper | 7.30  | 3.29 | 3.41 | 3.24  | 2.80 |
| WBP11   | S361  | Hyper | 5.77  | 1.95 | 4.04 | 1.77  | 2.08 |
| WBP11   | S364  | Hyper | 5.67  | 1.95 | 4.34 | 1.87  | 2.85 |
| NUP98   | T1053 | Hyper | 4.73  | 2.21 | 2.35 | 11.53 | 1.79 |
| NUP98   | T529  | Hyper | 4.34  | 2.67 | 2.65 | 2.52  | 2.16 |
| SRRM2   | S1083 | Hyper | 7.02  | 2.11 | 2.66 | 2.72  | 1.87 |
| SRRM2   | S1132 | Hyper | 14.53 | 2.49 | 3.40 | 2.57  | 1.97 |
| SRRM2   | S1320 | Hyper | 8.62  | 2.47 | 2.70 | 2.95  | 1.99 |
| SRRM2   | S1326 | Hyper | 11.32 | 2.43 | 2.76 | 2.87  | 2.01 |
| SRRM2   | S1329 | Hyper | 11.32 | 2.44 | 3.25 | 2.87  | 2.41 |
| SRRM2   | S1424 | Hyper | 15.09 | 2.53 | 2.17 | 2.57  | 2.26 |

|       |       |       |       |      |      |       |      |
|-------|-------|-------|-------|------|------|-------|------|
| SRRM2 | S1462 | Hyper | 5.64  | 2.01 | 2.75 | 2.97  | 2.40 |
| SRRM2 | S1857 | Hyper | 14.60 | 2.41 | 3.23 | 2.99  | 1.98 |
| SRRM2 | S1925 | Hyper | 43.54 | 2.30 | 2.54 | 3.37  | 3.95 |
| SRRM2 | S1948 | Hyper | 43.54 | 2.30 | 2.54 | 3.37  | 3.95 |
| SRRM2 | S1960 | Hyper | 43.54 | 2.30 | 2.54 | 3.37  | 3.95 |
| SRRM2 | S2121 | Hyper | 4.79  | 1.93 | 2.76 | 2.89  | 2.71 |
| SRRM2 | S2132 | Hyper | 8.16  | 1.90 | 2.72 | 2.66  | 1.65 |
| SRRM2 | S2398 | Hyper | 7.67  | 2.13 | 2.82 | 2.07  | 1.77 |
| SRRM2 | S2449 | Hyper | 4.09  | 2.08 | 2.33 | 2.34  | 1.85 |
| SRRM2 | S2688 | Hyper | 13.74 | 1.82 | 3.15 | 2.31  | 1.82 |
| SRRM2 | S297  | Hyper | 5.66  | 1.96 | 2.94 | 2.05  | 2.62 |
| SRRM2 | S322  | Hyper | 9.03  | 2.55 | 2.83 | 83.62 | 2.50 |
| SRRM2 | S323  | Hyper | 12.22 | 2.47 | 2.83 | 84.61 | 4.15 |
| SRRM2 | S353  | Hyper | 11.12 | 2.37 | 2.87 | 6.68  | 2.24 |
| SRRM2 | S440  | Hyper | 2.93  | 2.62 | 2.58 | 1.66  | 3.73 |
| SRRM2 | S510  | Hyper | 12.90 | 2.64 | 3.12 | 4.55  | 1.80 |
| SRRM2 | S778  | Hyper | 8.76  | 2.41 | 2.37 | 2.04  | 1.76 |
| SRRM2 | S783  | Hyper | 8.76  | 2.05 | 2.24 | 2.30  | 2.28 |
| SRRM2 | S838  | Hyper | 2.55  | 3.38 | 2.44 | 17.46 | 4.00 |
| SRRM2 | S864  | Hyper | 13.08 | 1.96 | 2.65 | 2.12  | 1.88 |
| SRRM2 | S875  | Hyper | 10.15 | 2.08 | 3.16 | 1.65  | 2.01 |
| SRRM2 | S876  | Hyper | 8.61  | 2.08 | 3.11 | 6.84  | 2.01 |
| SRRM2 | S970  | Hyper | 11.38 | 2.23 | 2.85 | 4.35  | 2.09 |
| SRRM2 | S972  | Hyper | 9.10  | 2.22 | 2.85 | 3.56  | 2.21 |
| SRRM2 | S973  | Hyper | 9.10  | 2.11 | 2.39 | 4.16  | 2.22 |
| SRRM2 | S974  | Hyper | 11.38 | 2.02 | 2.64 | 4.19  | 2.17 |
| SRRM2 | S994  | Hyper | 18.21 | 2.01 | 2.76 | 2.42  | 1.78 |
| SRRM2 | T1003 | Hyper | 9.16  | 2.14 | 2.77 | 2.34  | 2.02 |
| SRRM2 | T1492 | Hyper | 7.05  | 2.12 | 2.46 | 2.71  | 1.64 |
| SRRM2 | T2034 | Hyper | 5.69  | 1.98 | 3.33 | 2.90  | 1.72 |
| SRRM2 | T2104 | Hyper | 8.05  | 2.42 | 2.59 | 2.57  | 1.84 |
| SRRM2 | T866  | Hyper | 9.54  | 1.96 | 3.10 | 4.35  | 2.83 |
| SRRM2 | T983  | Hyper | 11.44 | 2.45 | 2.76 | 3.79  | 2.07 |
| CENPF | S3079 | Hyper | 5.09  | 2.08 | 5.84 | 2.83  | 1.89 |
| HACD3 | S114  | Hyper | 4.80  | 2.32 | 2.08 | 1.84  | 1.94 |
| RSF1  | S1282 | Hyper | 12.93 | 1.87 | 2.87 | 6.26  | 3.39 |
| RSF1  | S1310 | Hyper | 10.80 | 1.73 | 3.02 | 4.43  | 1.91 |
| RSF1  | S1370 | Hyper | 6.38  | 1.90 | 1.73 | 2.73  | 2.07 |
| RSF1  | S1375 | Hyper | 6.66  | 1.92 | 4.88 | 2.23  | 1.97 |
| RSF1  | S397  | Hyper | 9.70  | 2.59 | 3.42 | 4.56  | 2.14 |
| RSF1  | T1371 | Hyper | 6.16  | 1.86 | 1.73 | 2.76  | 3.06 |
| RSF1  | T628  | Hyper | 5.49  | 2.06 | 1.95 | 8.15  | 1.72 |
| KDM3B | S314  | Hyper | 59.91 | 1.96 | 2.21 | 2.49  | 2.03 |

|          |       |       |       |      |      |      |      |
|----------|-------|-------|-------|------|------|------|------|
| RNPC3    | S108  | Hyper | 6.58  | 2.31 | 2.55 | 3.32 | 1.71 |
| VPS13C   | S3598 | Hyper | 5.39  | 2.21 | 3.15 | 1.97 | 2.57 |
| CC2D1A   | S455  | Hyper | 6.62  | 1.70 | 2.25 | 1.84 | 1.77 |
| ANKHD1   | S1598 | Hyper | 6.54  | 2.14 | 3.09 | 3.63 | 1.91 |
| ALKBH5   | S69   | Hyper | 5.48  | 1.78 | 2.66 | 4.13 | 1.81 |
| TBC1D22B | S132  | Hyper | 8.94  | 1.76 | 3.36 | 3.11 | 3.21 |
| CHD7     | T2567 | Hyper | 4.03  | 2.25 | 2.36 | 1.75 | 2.84 |
| PHIP     | S1283 | Hyper | 2.07  | 2.59 | 3.03 | 3.16 | 5.40 |
| PHIP     | S1783 | Hyper | 4.95  | 2.04 | 2.05 | 2.35 | 2.07 |
| IWS1     | S422  | Hyper | 10.07 | 2.39 | 5.18 | 1.82 | 4.63 |
| IWS1     | S513  | Hyper | 13.05 | 2.72 | 2.78 | 3.96 | 2.39 |
| KIF26B   | S977  | Hyper | 13.59 | 1.98 | 4.27 | 2.68 | 1.96 |
| ASXL2    | S395  | Hyper | 8.41  | 2.14 | 2.78 | 2.01 | 1.70 |
| ASXL2    | S834  | Hyper | 5.84  | 1.79 | 2.17 | 2.22 | 2.07 |
| ZC3H15   | S381  | Hyper | 13.70 | 2.58 | 2.62 | 2.36 | 1.82 |
| TERF2IP  | S154  | Hyper | 6.87  | 2.36 | 2.48 | 2.21 | 2.03 |
| SASH3    | S38   | Hyper | 4.04  | 2.20 | 2.21 | 2.25 | 2.68 |
| EML4     | S134  | Hyper | 9.37  | 2.46 | 4.62 | 3.73 | 2.62 |
| EML4     | S146  | Hyper | 6.70  | 1.76 | 2.84 | 3.46 | 2.48 |
| EML4     | T897  | Hyper | 5.87  | 1.57 | 1.78 | 4.18 | 1.95 |
| EML4     | T899  | Hyper | 5.47  | 1.62 | 2.03 | 4.18 | 1.95 |
| KIAA1217 | S1551 | Hyper | 4.97  | 2.42 | 3.05 | 1.90 | 2.05 |
| KIAA1217 | S361  | Hyper | 2.16  | 1.73 | 1.74 | 3.60 | 1.94 |
| KIAA1217 | S365  | Hyper | 4.39  | 1.87 | 1.91 | 3.33 | 1.80 |
| MEPCE    | S254  | Hyper | 8.01  | 3.31 | 4.08 | 6.30 | 2.52 |
| MEPCE    | S60   | Hyper | 5.40  | 2.16 | 2.80 | 2.75 | 2.09 |
| ZC3HAV1  | S275  | Hyper | 3.18  | 1.75 | 2.13 | 1.72 | 1.79 |
| ZC3HAV1  | S280  | Hyper | 6.28  | 2.10 | 2.19 | 2.70 | 1.76 |
| ZC3HAV1  | S346  | Hyper | 6.57  | 2.12 | 3.00 | 7.41 | 1.62 |
| ZC3HAV1  | S631  | Hyper | 3.51  | 1.57 | 1.73 | 1.95 | 1.59 |
| OTUD7B   | S471  | Hyper | 7.25  | 1.75 | 2.66 | 2.53 | 5.37 |
| UTP3     | S368  | Hyper | 3.45  | 2.06 | 2.99 | 1.66 | 2.05 |
| CBX8     | S256  | Hyper | 10.08 | 1.68 | 3.00 | 8.45 | 2.28 |
| GATAD2B  | S122  | Hyper | 5.98  | 2.72 | 2.08 | 2.69 | 5.04 |
| GATAD2B  | T120  | Hyper | 4.35  | 2.00 | 2.06 | 3.16 | 5.04 |
| PRR12    | S1381 | Hyper | 3.79  | 1.91 | 2.38 | 2.42 | 1.62 |
| NUFIP2   | S214  | Hyper | 8.51  | 2.16 | 5.31 | 1.74 | 4.39 |
| NUFIP2   | S572  | Hyper | 6.15  | 2.16 | 2.96 | 2.80 | 3.68 |
| NUFIP2   | T87   | Hyper | 21.31 | 2.73 | 8.91 | 2.24 | 7.33 |
| CAMSAP3  | S334  | Hyper | 11.79 | 2.50 | 3.14 | 2.85 | 3.81 |
| CAMSAP3  | S814  | Hyper | 13.41 | 2.46 | 3.30 | 3.26 | 2.63 |
| PLEKHA4  | S575  | Hyper | 2.94  | 2.07 | 1.96 | 4.42 | 1.69 |
| ALS2     | S1335 | Hyper | 5.10  | 1.76 | 2.00 | 1.67 | 1.82 |

|          |       |       |       |      |      |      |      |
|----------|-------|-------|-------|------|------|------|------|
| NCOA5    | S29   | Hyper | 3.15  | 4.13 | 2.74 | 1.91 | 1.94 |
| NCOA5    | S34   | Hyper | 1.98  | 2.83 | 2.42 | 1.84 | 1.81 |
| NDUFV3   | S158  | Hyper | 5.22  | 1.88 | 2.29 | 1.76 | 1.87 |
| PPP1R11  | S77   | Hyper | 8.31  | 1.90 | 4.15 | 2.05 | 1.57 |
| PGM5     | S122  | Hypo  | 0.47  | 0.23 | 0.52 | 0.18 | 0.32 |
| UBE2O    | S896  | Hyper | 5.01  | 1.86 | 1.81 | 2.57 | 2.63 |
| CHTF18   | S871  | Hyper | 9.66  | 2.42 | 3.71 | 2.12 | 5.09 |
| GOLPH3   | S36   | Hyper | 14.04 | 1.94 | 3.95 | 2.09 | 2.15 |
| IFIH1    | S301  | Hyper | 16.92 | 2.20 | 2.56 | 4.33 | 2.82 |
| NCAPG    | S674  | Hyper | 14.70 | 3.10 | 6.95 | 3.82 | 3.84 |
| NCAPG    | S975  | Hyper | 8.04  | 2.67 | 6.02 | 2.55 | 4.06 |
| DNAJC1   | S480  | Hyper | 2.90  | 1.88 | 3.53 | 3.09 | 1.96 |
| NSD1     | S486  | Hyper | 5.77  | 1.84 | 2.86 | 2.65 | 2.09 |
| SUDS3    | S53   | Hyper | 8.14  | 2.09 | 2.91 | 2.82 | 2.23 |
| SUDS3    | T49   | Hyper | 6.97  | 2.31 | 2.29 | 2.38 | 2.28 |
| ANAPC1   | S688  | Hyper | 3.10  | 2.07 | 3.87 | 2.44 | 1.63 |
| NUCKS1   | S181  | Hyper | 2.26  | 1.93 | 9.39 | 3.00 | 2.60 |
| NUCKS1   | S58   | Hyper | 2.46  | 1.84 | 1.90 | 2.76 | 1.65 |
| NUCKS1   | S61   | Hyper | 3.06  | 1.95 | 1.78 | 2.71 | 1.77 |
| NUCKS1   | S73   | Hyper | 5.04  | 2.35 | 2.29 | 2.31 | 2.32 |
| NUCKS1   | T179  | Hyper | 3.06  | 2.01 | 4.59 | 1.93 | 2.29 |
| ACBD3    | S43   | Hyper | 4.53  | 2.23 | 2.61 | 2.49 | 2.25 |
| PLEKHG2  | S1261 | Hyper | 3.01  | 1.98 | 1.93 | 2.52 | 1.66 |
| CBFB     | S173  | Hyper | 7.26  | 2.46 | 2.94 | 2.35 | 2.41 |
| KRI1     | S634  | Hyper | 9.00  | 1.98 | 2.13 | 2.56 | 1.86 |
| MARCKSL1 | S120  | Hyper | 8.49  | 1.68 | 2.01 | 4.29 | 3.67 |
| MARCKSL1 | T122  | Hyper | 9.27  | 2.93 | 2.01 | 5.50 | 3.67 |
| RSRC2    | S27   | Hyper | 12.49 | 1.97 | 2.11 | 1.76 | 2.15 |
| RSRC2    | S32   | Hyper | 8.32  | 1.97 | 1.91 | 2.08 | 1.93 |
| DDX50    | S41   | Hyper | 11.43 | 2.78 | 2.29 | 2.75 | 1.76 |
| C2orf49  | S189  | Hyper | 4.99  | 2.15 | 2.46 | 2.04 | 1.68 |
| CCDC86   | S102  | Hyper | 7.90  | 1.83 | 2.33 | 2.74 | 5.17 |
| CCDC86   | S110  | Hyper | 3.91  | 2.62 | 2.63 | 3.30 | 8.33 |
| CCDC86   | S113  | Hyper | 6.77  | 2.45 | 2.52 | 3.05 | 2.01 |
| DSC2     | S873  | Hyper | 3.51  | 1.54 | 3.97 | 4.16 | 2.30 |
| NKAP     | S149  | Hyper | 10.81 | 2.28 | 3.96 | 2.12 | 1.84 |
| NKAP     | S157  | Hyper | 9.55  | 2.20 | 4.50 | 2.92 | 2.01 |
| NKAP     | T161  | Hyper | 9.55  | 2.36 | 4.50 | 2.92 | 2.01 |
| RNF219   | S210  | Hyper | 22.08 | 4.84 | 6.29 | 6.00 | 3.15 |
| NUP210   | T1844 | Hyper | 9.52  | 2.71 | 3.64 | 4.63 | 2.30 |
| TANC2    | S400  | Hyper | 11.51 | 1.97 | 2.91 | 2.92 | 1.76 |
| TTYH3    | S496  | Hyper | 5.48  | 2.20 | 3.76 | 2.88 | 2.09 |
| ARPC5L   | S64   | Hyper | 3.94  | 2.06 | 2.56 | 2.04 | 1.60 |

|         |       |       |       |      |      |         |       |
|---------|-------|-------|-------|------|------|---------|-------|
| EPPK1   | S2508 | Hyper | 9.43  | 1.97 | 2.43 | 2.30    | 4.58  |
| EPPK1   | S3044 | Hyper | 9.43  | 1.97 | 2.43 | 2.30    | 4.58  |
| EPPK1   | S3575 | Hyper | 9.43  | 1.97 | 2.43 | 2.30    | 4.58  |
| EPPK1   | S4109 | Hyper | 9.43  | 1.97 | 2.43 | 2.30    | 4.58  |
| HUWE1   | S3757 | Hyper | 3.67  | 1.76 | 2.06 | 2.19    | 1.68  |
| HUWE1   | T3924 | Hyper | 4.81  | 1.86 | 2.19 | 4306.11 | 1.98  |
| L3MBTL2 | S683  | Hyper | 6.93  | 1.91 | 2.62 | 1.80    | 2.20  |
| HNRNPU  | S59   | Hyper | 5.85  | 1.87 | 2.81 | 3.05    | 1.88  |
| NSRP1   | S254  | Hyper | 8.03  | 2.13 | 3.40 | 6.88    | 3.05  |
| PCNX3   | S1955 | Hyper | 4.95  | 1.69 | 2.39 | 2.24    | 1.74  |
| BAZ1B   | S160  | Hyper | 19.80 | 3.15 | 2.11 | 6.11    | 2.48  |
| BAZ1B   | S947  | Hyper | 11.68 | 1.84 | 2.00 | 2.13    | 1.68  |
| BUD13   | S163  | Hyper | 5.44  | 1.97 | 1.73 | 1.96    | 1.86  |
| LMNB2   | S407  | Hyper | 1.75  | 2.36 | 2.65 | 5.34    | 1.74  |
| SYAP1   | T248  | Hyper | 3.68  | 1.78 | 2.83 | 2.55    | 2.00  |
| CEP89   | S44   | Hyper | 6.41  | 1.73 | 2.96 | 1.97    | 2.11  |
| PRPF38A | S193  | Hyper | 4.74  | 1.83 | 2.28 | 6.60    | 3.80  |
| PRPF38A | S194  | Hyper | 4.74  | 1.83 | 2.28 | 6.60    | 2.74  |
| CASP2   | S340  | Hyper | 8.82  | 2.89 | 2.10 | 3.74    | 2.04  |
| PURB    | S101  | Hyper | 9.66  | 2.13 | 2.87 | 2.66    | 1.90  |
| PML     | S403  | Hyper | 3.34  | 2.69 | 2.55 | 3.34    | 1.72  |
| PML     | S479  | Hyper | 3.39  | 1.90 | 2.13 | 2.15    | 1.97  |
| PML     | S482  | Hyper | 3.02  | 2.15 | 2.10 | 3.40    | 1.97  |
| PML     | T409  | Hyper | 7.73  | 2.66 | 2.55 | 4.59    | 1.72  |
| GPRIN1  | S615  | Hyper | 4.82  | 1.76 | 5.18 | 2.50    | 3.26  |
| RBM33   | S205  | Hyper | 5.52  | 2.50 | 2.83 | 4.16    | 1.62  |
| RBM33   | S765  | Hyper | 10.30 | 2.57 | 2.70 | 3.97    | 1.88  |
| GIT2    | S394  | Hyper | 4.66  | 3.15 | 2.93 | 5.44    | 1.90  |
| MYO18A  | S2041 | Hyper | 4.98  | 1.61 | 2.10 | 1.70    | 1.95  |
| MYO18A  | S2043 | Hyper | 4.35  | 1.78 | 2.02 | 2.50    | 1.64  |
| GLCCI1  | S145  | Hyper | 10.94 | 1.69 | 2.29 | 1.73    | 2.05  |
| GLCCI1  | S148  | Hyper | 3.06  | 1.58 | 2.67 | 2.62    | 2.13  |
| SON     | S1076 | Hyper | 3.47  | 2.21 | 2.84 | 2.02    | 2.18  |
| SYNM    | S777  | Hypo  | 0.55  | 0.18 | 0.46 | 0.25    | 0.28  |
| SRFBP1  | S203  | Hyper | 12.43 | 3.04 | 3.71 | 5.01    | 2.76  |
| PROSER2 | T17   | Hyper | 5.99  | 2.27 | 2.23 | 1.95    | 17.27 |
| UBN2    | S13   | Hyper | 7.86  | 2.32 | 1.99 | 3.67    | 2.01  |
| UBN2    | S584  | Hyper | 20.14 | 2.69 | 3.23 | 4.12    | 1.79  |
| DIP2B   | S146  | Hyper | 4.62  | 1.74 | 2.52 | 2.07    | 2.17  |
| DDX51   | S83   | Hyper | 8.05  | 3.08 | 3.04 | 2.61    | 1.70  |
| RETREG3 | S313  | Hyper | 3.54  | 1.95 | 2.35 | 3.24    | 1.90  |
| RETREG3 | S320  | Hyper | 3.80  | 1.86 | 2.39 | 3.18    | 2.06  |
| STT3B   | S498  | Hyper | 7.91  | 2.31 | 2.32 | 3.68    | 2.17  |

|         |       |       |       |      |      |      |      |
|---------|-------|-------|-------|------|------|------|------|
| STT3B   | S499  | Hyper | 4.59  | 2.17 | 2.14 | 3.11 | 1.96 |
| CRTC2   | S613  | Hyper | 5.21  | 1.73 | 2.20 | 2.48 | 2.20 |
| FAM83H  | S516  | Hyper | 7.89  | 1.87 | 3.93 | 1.75 | 1.90 |
| FAM83H  | S523  | Hyper | 7.45  | 2.10 | 3.81 | 2.04 | 1.91 |
| FAM83H  | S892  | Hyper | 7.32  | 1.78 | 2.96 | 1.91 | 3.61 |
| FAM83H  | S914  | Hyper | 8.05  | 1.73 | 2.41 | 1.87 | 2.13 |
| CCDC137 | S19   | Hyper | 6.00  | 2.87 | 2.25 | 3.16 | 1.95 |
| PLEC    | S4613 | Hyper | 2.86  | 1.66 | 3.12 | 5.39 | 1.95 |
| PLEC    | Y4615 | Hyper | 2.52  | 1.83 | 2.67 | 5.35 | 1.95 |
| PLEC    | S4476 | Hyper | 2.86  | 1.66 | 3.12 | 5.39 | 1.95 |
| PLEC    | Y4478 | Hyper | 2.52  | 1.83 | 2.67 | 5.35 | 1.95 |
| RBM12B  | S280  | Hyper | 8.41  | 2.28 | 2.50 | 2.20 | 3.61 |
| RBM12B  | S710  | Hyper | 11.16 | 1.93 | 2.18 | 2.57 | 1.73 |
| RBM12B  | S718  | Hyper | 11.91 | 2.08 | 2.32 | 2.25 | 1.73 |
| RBM12B  | S839  | Hyper | 4.54  | 2.19 | 2.15 | 2.10 | 1.73 |
| BLOC1S3 | S65   | Hyper | 4.23  | 1.72 | 3.11 | 1.95 | 1.79 |

Table S3: Proteins enriched in the cell cycle pathway

| Gene symbol | Uniprot ID     | ENSEMBLE ID     |
|-------------|----------------|-----------------|
| AAAS        | Q9NRG9         |                 |
| AHCTF1      | Q8WYP5         |                 |
| ANAPC1      | Q9H1A4         |                 |
| ANAPC2      | Q9UJX6         |                 |
| CDC20       | Q12834         |                 |
| CDCA8       | Q53HL2         |                 |
| CDK1        | P06493         | ENSG00000170312 |
| CENPF       | P49454         | ENSG00000117724 |
| CEP152      | O94986         |                 |
| CLIP1       | P30622         |                 |
| CLSPN       | Q9HAW4         |                 |
| DIDO1       | Q9BTC0-1       |                 |
| GOLGA2      | Q08379         |                 |
| GORASP2     | Q9H8Y8         |                 |
| HDAC1       | Q13547         |                 |
| HSP90AA1    | P07900         |                 |
| HSP90AB1    | P08238         |                 |
| INCENP      | Q9NQS7         |                 |
| LIG1        | P18858         |                 |
| LMNB1       | P20700         |                 |
| MCM2        | P33993, P49736 |                 |
| MCM4        | P33991         |                 |



|         |                                 |                 |
|---------|---------------------------------|-----------------|
| MCM6    | Q14566                          |                 |
| MDC1    | Q14676                          |                 |
| NCAPG   | Q9BPX3                          |                 |
| NIPBL   | Q6KC79                          |                 |
| NUDC    | Q9Y266                          |                 |
| NUP210  | Q8TEM1                          |                 |
| NUP35   | Q8NFH5                          |                 |
| NUP88   | Q99567                          |                 |
| NUP98   | P52948-3, P52948-4,<br>P52948-5 |                 |
| ORC2    | Q13416                          |                 |
| PDS5A   | Q29RF7                          |                 |
| PDS5B   | Q9NTI5                          |                 |
| PHF8    | Q9UPP1-3, Q9UPP1-1,<br>Q9UPP1-2 |                 |
| RANBP2  | P49792                          |                 |
| RANGAP1 | P46060                          |                 |
| RB1     | P06400                          |                 |
| RBBP8   | Q99708                          |                 |
| RSF1    | Q96T23                          |                 |
| SET     | Q01105                          |                 |
| TERF2IP | Q9NYB0                          |                 |
| TOP2A   | P11388                          | ENSG00000131747 |
| TP53BP1 | Q12888                          |                 |
| TPR     | P12270                          |                 |
| TUBA1C  | P68363, Q9BQE3                  |                 |
| WEE1    | P30291, Q99640                  |                 |
| WRAP53  | Q9BUR4                          |                 |

Table S4: Kinase-substrate links from KSEA analysis

| Kinase.Gene | Substrate.Gene | Substrate.Mod | Source          | log2FC  |
|-------------|----------------|---------------|-----------------|---------|
| ADRBK1      | CAV1           | S37           | NetworKIN       | 2.23897 |
| ADRBK1      | GIT2           | S394          | NetworKIN       | 1.65423 |
| ADRBK1      | HDAC1          | S421          | NetworKIN       | 1.4713  |
| ADRBK2      | HSP90AA1       | S385          | NetworKIN       | 1.11314 |
| AKT1        | HSP90AB1       | S226          | NetworKIN       | 1.50592 |
| AKT1        | CARHSP1        | S30           | NetworKIN       | 1.16146 |
| AKT1        | CARHSP1        | S32           | NetworKIN       | 1.131   |
| AKT1        | SLC9A1         | S605          | NetworKIN       | 1.26777 |
| AKT1        | CRTC2          | S613          | NetworKIN       | 1.14025 |
| AKT1        | DNMT1          | S143          | PhosphoSitePlus | 1.47309 |
| AKT2        | CRTC2          | S613          | NetworKIN       | 1.14025 |

|          |         |       |                 |         |
|----------|---------|-------|-----------------|---------|
| ARAF     | PBK     | S59   | NetworKIN       | 1.90205 |
| ATM      | TP53BP1 | S1073 | NetworKIN       | 1.93093 |
| ATM      | TP53BP1 | S836  | NetworKIN       | 1.1972  |
| ATM      | PNKP    | S114  | PhosphoSitePlus | 1.02181 |
| ATR      | TP53BP1 | S1073 | NetworKIN       | 1.93093 |
| ATR      | TP53BP1 | S836  | NetworKIN       | 1.1972  |
| AURKA    | TOP2A   | S1106 | NetworKIN       | 2.10765 |
| AURKA    | MKI67   | S1131 | NetworKIN       | 1.79269 |
| AURKA    | TOP2A   | S1247 | NetworKIN       | 2.44481 |
| AURKA    | TOP2A   | S1393 | NetworKIN       | 2.02465 |
| AURKA    | SKA3    | S155  | NetworKIN       | 1.18512 |
| AURKA    | CDC48   | S219  | NetworKIN       | 1.78881 |
| AURKA    | MKI67   | S2223 | NetworKIN       | 1.8256  |
| AURKA    | INCENP  | S263  | NetworKIN       | 1.16519 |
| AURKA    | ANAPC2  | S314  | NetworKIN       | 1.48343 |
| AURKA    | MKI67   | S357  | NetworKIN       | 1.69444 |
| AURKA    | MKI67   | S374  | NetworKIN       | 2.27461 |
| AURKA    | CDC20   | S41   | NetworKIN       | 1.57018 |
| AURKA    | TACC3   | S434  | NetworKIN       | 1.01613 |
| AURKA    | PBK     | S59   | NetworKIN       | 1.90205 |
| AURKA    | NCAPG   | S674  | NetworKIN       | 1.94288 |
| AURKA    | ANAPC1  | S688  | NetworKIN       | 1.28971 |
| AURKA    | NCAPG   | S975  | NetworKIN       | 2.02109 |
| AURKA    | MKI67   | T1923 | NetworKIN       | 1.4364  |
| AURKB    | RACGAP1 | S203  | NetworKIN       | 2.17411 |
| AURKB    | ANAPC1  | S688  | NetworKIN       | 1.28971 |
| AURKB    | NCAPG   | S975  | NetworKIN       | 2.02109 |
| AURKB    | CDC48   | S219  | PhosphoSitePlus | 1.78881 |
| AURKB    | MKI67   | S374  | PhosphoSitePlus | 2.27461 |
| AURKC    | INCENP  | S263  | NetworKIN       | 1.16519 |
|          |         |       |                 | -       |
| BMX      | CAV1    | Y42   | NetworKIN       | 1.49196 |
|          |         |       |                 | -       |
| BTK      | CAV1    | Y42   | NetworKIN       | 1.49196 |
| BUB1     | CDC20   | S41   | PhosphoSitePlus | 1.57018 |
| CAMK2A   | KRT18   | S30   | NetworKIN       | 1.78629 |
| CAMK4    | SRFBP1  | S203  | NetworKIN       | 1.89092 |
| CAMK4    | CRTC2   | S613  | NetworKIN       | 1.14025 |
| CDC42BPA | MYO18A  | S2041 | NetworKIN       | 0.96562 |
| CDC42BPA | MYO18A  | S2043 | NetworKIN       | 1.01456 |
| CDC42BPB | MYO18A  | S2041 | NetworKIN       | 0.96562 |
| CDC42BPB | MYO18A  | S2043 | NetworKIN       | 1.01456 |
| CDC7     | MCM2    | S139  | PhosphoSitePlus | 1.42615 |
| CDK1     | TP53BP1 | S1033 | NetworKIN       | 1.15002 |
| CDK1     | TP53BP1 | S1099 | NetworKIN       | 1.42362 |
| CDK1     | TP53BP1 | S1106 | NetworKIN       | 1.47492 |
| CDK1     | MKI67   | S1131 | NetworKIN       | 1.79269 |

|      |         |       |           |         |
|------|---------|-------|-----------|---------|
| CDK1 | NUDC    | S139  | NetworKIN | 1.62252 |
| CDK1 | TP53BP1 | S1431 | NetworKIN | 1.15094 |
| CDK1 | SKA3    | S155  | NetworKIN | 1.18512 |
| CDK1 | WEE1    | S165  | NetworKIN | 1.71177 |
| CDK1 | GTF3C2  | S167  | NetworKIN | 1.11175 |
| CDK1 | TP53BP1 | S1683 | NetworKIN | 2.41735 |
| CDK1 | POLR2A  | S1850 | NetworKIN | 1.19168 |
| CDK1 | POLR2A  | S1917 | NetworKIN | 0.93825 |
| CDK1 | POLR2A  | S1931 | NetworKIN | 0.93825 |
| CDK1 | CDCA8   | S219  | NetworKIN | 1.78881 |
| CDK1 | MKI67   | S2223 | NetworKIN | 1.8256  |
| CDK1 | XRCC1   | S241  | NetworKIN | 2.4465  |
| CDK1 | INCENP  | S263  | NetworKIN | 1.16519 |
| CDK1 | HSF1    | S307  | NetworKIN | 1.23979 |
| CDK1 | ANAPC2  | S314  | NetworKIN | 1.48343 |
| CDK1 | DES     | S32   | NetworKIN | 1.81277 |
| CDK1 | ATAD2   | S342  | NetworKIN | 2.02787 |
| CDK1 | MKI67   | S357  | NetworKIN | 1.69444 |
| CDK1 | CDC20   | S41   | NetworKIN | 1.57018 |
| CDK1 | USP20   | S413  | NetworKIN | 1.0049  |
| CDK1 | ASPM    | S425  | NetworKIN | 1.53023 |
| CDK1 | TACC3   | S434  | NetworKIN | 1.01613 |
| CDK1 | RANGAP1 | S442  | NetworKIN | 2.07844 |
| CDK1 | XRCC1   | S447  | NetworKIN | 1.78105 |
| CDK1 | LIG1    | S51   | NetworKIN | 2.22764 |
| CDK1 | CD2AP   | S510  | NetworKIN | 1.94251 |
| CDK1 | CD2AP   | S514  | NetworKIN | 1.58184 |
| CDK1 | TP53BP1 | S530  | NetworKIN | 1.07132 |
| CDK1 | PBK     | S59   | NetworKIN | 1.90205 |
| CDK1 | NCL     | S67   | NetworKIN | 2.06734 |
| CDK1 | SET     | S7    | NetworKIN | 1.36837 |
| CDK1 | HSPD1   | S70   | NetworKIN | 1.68869 |
| CDK1 | RBM15   | S700  | NetworKIN | 1.53344 |
| CDK1 | RBM15   | S741  | NetworKIN | 1.42711 |
| CDK1 | RANBP2  | S781  | NetworKIN | 1.72538 |
| CDK1 | MSH6    | S830  | NetworKIN | 1.56627 |
| CDK1 | SIN3A   | S860  | NetworKIN | 1.27663 |
| CDK1 | DGCR8   | S95   | NetworKIN | 1.09056 |
| CDK1 | NUCKS1  | T179  | NetworKIN | 1.1932  |
| CDK1 | LIG1    | T183  | NetworKIN | 2.07477 |
| CDK1 | NUP210  | T1844 | NetworKIN | 1.86309 |
| CDK1 | MKI67   | T1923 | NetworKIN | 1.4364  |
| CDK1 | RACGAP1 | T342  | NetworKIN | 1.4927  |
| CDK1 | GORASP2 | T415  | NetworKIN | 1.02916 |
| CDK1 | NCL     | T76   | NetworKIN | 2.02747 |
| CDK1 | RANBP2  | T799  | NetworKIN | 1.66902 |

|      |          |       |                 |         |
|------|----------|-------|-----------------|---------|
| CDK1 | TOP2A    | S1247 | PhosphoSitePlus | 2.44481 |
| CDK1 | RSF1     | S1375 | PhosphoSitePlus | 1.15962 |
| CDK1 | TOP2A    | S1393 | PhosphoSitePlus | 2.02465 |
| CDK1 | DNMT1    | S154  | PhosphoSitePlus | 1.9667  |
| CDK1 | TCOF1    | S156  | PhosphoSitePlus | 2.04302 |
| CDK1 | NUCKS1   | S181  | PhosphoSitePlus | 1.37912 |
| CDK1 | ELAVL1   | S202  | PhosphoSitePlus | 1.15523 |
| CDK1 | LIG3     | S210  | PhosphoSitePlus | 1.46939 |
| CDK1 | RB1      | S249  | PhosphoSitePlus | 1.32839 |
| CDK1 | PAICS    | S27   | PhosphoSitePlus | 1.62824 |
| CDK1 | SQSTM1   | S272  | PhosphoSitePlus | 1.31807 |
| CDK1 | HMGA1    | S36   | PhosphoSitePlus | 1.28941 |
| CDK1 | OGFR     | S378  | PhosphoSitePlus | 1.17955 |
| CDK1 | LMNB1    | S393  | PhosphoSitePlus | 1.23714 |
| CDK1 | ANAPC1   | S688  | PhosphoSitePlus | 1.28971 |
| CDK1 | RB1      | S807  | PhosphoSitePlus | 1.60762 |
| CDK1 | RANBP2   | T2153 | PhosphoSitePlus | 1.62718 |
| CDK1 | RB1      | T373  | PhosphoSitePlus | 1.47486 |
| CDK1 | EZH2     | T487  | PhosphoSitePlus | 1.26217 |
| CDK1 | NUP98    | T529  | PhosphoSitePlus | 1.40661 |
| CDK1 | HMGA1    | T53   | PhosphoSitePlus | 1.89968 |
| CDK1 | EIF4EBP1 | T70   | PhosphoSitePlus | 1.16322 |
| CDK1 | SRRM2    | T866  | PhosphoSitePlus | 1.63458 |
| CDK2 | WEE1     | S165  | NetworKIN       | 1.71177 |
| CDK2 | ANAPC2   | S314  | NetworKIN       | 1.48343 |
| CDK2 | LMNB1    | S393  | NetworKIN       | 1.23714 |
| CDK2 | AXIN1    | S486  | NetworKIN       | 2.0635  |
| CDK2 | AXIN1    | S493  | NetworKIN       | 2.10376 |
| CDK2 | ANAPC1   | S688  | NetworKIN       | 1.28971 |
| CDK2 | MCM2     | S139  | PhosphoSitePlus | 1.42615 |
| CDK2 | NUDC     | S139  | PhosphoSitePlus | 1.62252 |
| CDK2 | DNMT1    | S154  | PhosphoSitePlus | 1.9667  |
| CDK2 | PHF6     | S154  | PhosphoSitePlus | 1.7175  |
| CDK2 | TPR      | S1676 | PhosphoSitePlus | 2.12743 |
| CDK2 | NUCKS1   | S181  | PhosphoSitePlus | 1.37912 |
| CDK2 | POLR2A   | S1917 | PhosphoSitePlus | 0.93825 |
| CDK2 | ELAVL1   | S202  | PhosphoSitePlus | 1.15523 |
| CDK2 | ANKRD17  | S2044 | PhosphoSitePlus | 1.01822 |
| CDK2 | LIG3     | S210  | PhosphoSitePlus | 1.46939 |
| CDK2 | SNRNP70  | S226  | PhosphoSitePlus | 1.51062 |
| CDK2 | RB1      | S249  | PhosphoSitePlus | 1.32839 |
| CDK2 | PAICS    | S27   | PhosphoSitePlus | 1.62824 |
| CDK2 | MKI67    | S357  | PhosphoSitePlus | 1.69444 |
| CDK2 | HMGA1    | S36   | PhosphoSitePlus | 1.28941 |
| CDK2 | RPL12    | S38   | PhosphoSitePlus | 1.98349 |
| CDK2 | LIG1     | S51   | PhosphoSitePlus | 2.22764 |

|       |          |       |                 |         |
|-------|----------|-------|-----------------|---------|
| CDK2  | PPP1R35  | S52   | PhosphoSitePlus | 0.91985 |
| CDK2  | NCL      | S67   | PhosphoSitePlus | 2.06734 |
| CDK2  | RB1      | S807  | PhosphoSitePlus | 1.60762 |
| CDK2  | C17orf49 | S96   | PhosphoSitePlus | 1.56743 |
| CDK2  | MARCKS   | T150  | PhosphoSitePlus | 1.05804 |
| CDK2  | ORC2     | T226  | PhosphoSitePlus | 2.00628 |
| CDK2  | RB1      | T373  | PhosphoSitePlus | 1.47486 |
| CDK2  | NCL      | T76   | PhosphoSitePlus | 2.02747 |
| CDK3  | RB1      | S807  | PhosphoSitePlus | 1.60762 |
| CDK4  | MCM4     | S120  | NetworKIN       | 1.89214 |
| CDK4  | HSP90AA1 | S385  | NetworKIN       | 1.11314 |
| CDK4  | MCM6     | S762  | NetworKIN       | 1.3484  |
| CDK4  | CLSPN    | S83   | NetworKIN       | 2.27774 |
| CDK4  | RB1      | S807  | PhosphoSitePlus | 1.60762 |
| CDK4  | RB1      | T373  | PhosphoSitePlus | 1.47486 |
| CDK5  | NUDC     | S139  | NetworKIN       | 1.62252 |
| CDK5  | KATNA1   | S170  | NetworKIN       | 0.97103 |
| CDK5  | ABI1     | S183  | NetworKIN       | 0.84985 |
| CDK5  | SRFBP1   | S203  | NetworKIN       | 1.89092 |
| CDK5  | TACC3    | S434  | NetworKIN       | 1.01613 |
| CDK5  | SET      | S7    | NetworKIN       | 1.36837 |
| CDK5  | DNMT1    | S154  | PhosphoSitePlus | 1.9667  |
| CDK5  | ELAVL1   | S202  | PhosphoSitePlus | 1.15523 |
| CDK5  | RB1      | S807  | PhosphoSitePlus | 1.60762 |
| CDK6  | HDAC1    | S423  | NetworKIN       | 1.5148  |
| CDK6  | RB1      | S807  | PhosphoSitePlus | 1.60762 |
| CDK7  | POLR2A   | S1850 | NetworKIN       | 1.19168 |
| CDK7  | POLR2A   | S1917 | NetworKIN       | 0.93825 |
| CDK7  | POLR2A   | S1931 | NetworKIN       | 0.93825 |
| CDK7  | SSRP1    | S444  | NetworKIN       | 1.35103 |
| CDK7  | MCM2     | S139  | PhosphoSitePlus | 1.42615 |
| CDK7  | CDK1     | T161  | PhosphoSitePlus | 1.22206 |
| CDK9  | RB1      | S807  | PhosphoSitePlus | 1.60762 |
| CHEK1 | RACGAP1  | S203  | PhosphoSitePlus | 2.17411 |
| CHEK1 | CCDC6    | S240  | PhosphoSitePlus | 0.93911 |
| CHUK  | SQSTM1   | S24   | NetworKIN       | 1.0846  |
| CHUK  | SQSTM1   | S272  | NetworKIN       | 1.31807 |
| CHUK  | HSP90AA1 | S385  | NetworKIN       | 1.11314 |
| CLK1  | SRRM2    | S1424 | NetworKIN       | 1.33784 |
| CLK1  | SRRM2    | S1857 | NetworKIN       | 1.5782  |
| CLK1  | SRRM2    | S1925 | NetworKIN       | 1.75443 |
| CLK1  | SRRM2    | S1948 | NetworKIN       | 1.75443 |
| CLK1  | BCLAF1   | S196  | NetworKIN       | 1.52943 |
| CLK1  | SRRM2    | S1960 | NetworKIN       | 1.75443 |
| CLK1  | SRRM2    | S2132 | NetworKIN       | 1.40875 |
| CLK1  | SNRNP70  | S226  | NetworKIN       | 1.51062 |

|         |         |       |                 |         |
|---------|---------|-------|-----------------|---------|
| CLK1    | SRRM2   | S297  | NetworKIN       | 1.38899 |
| CLK1    | RSRC2   | S32   | NetworKIN       | 0.97756 |
| CLK1    | SRRM2   | S323  | NetworKIN       | 2.05395 |
| CLK1    | SRRM2   | S353  | NetworKIN       | 1.5189  |
| CLK1    | SRRM2   | S510  | NetworKIN       | 1.63986 |
| CLK1    | PPIG    | S745  | NetworKIN       | 1.30784 |
| CLK1    | SRRM2   | S783  | NetworKIN       | 1.18805 |
| CLK1    | SRRM2   | S972  | NetworKIN       | 1.51052 |
| CLK1    | SRRM2   | T1003 | NetworKIN       | 1.22554 |
| CLK1    | SRRM2   | T2034 | NetworKIN       | 1.53495 |
| CLK1    | SRRM2   | T2104 | NetworKIN       | 1.36049 |
| CLK1    | SRRM2   | T983  | NetworKIN       | 1.46639 |
| CLK2    | CLK3    | S224  | NetworKIN       | 1.13123 |
| CLK2    | CLK3    | S226  | NetworKIN       | 1.08368 |
| CLK2    | TRA2B   | S264  | NetworKIN       | 1.71092 |
| CLK2    | TRA2B   | S266  | NetworKIN       | 1.61851 |
| CLK3    | CLK3    | S224  | NetworKIN       | 1.13123 |
| CLK3    | CLK3    | S226  | NetworKIN       | 1.08368 |
| CSNK1A1 | SSRP1   | S444  | NetworKIN       | 1.35103 |
| CSNK1A1 | AXIN1   | S486  | NetworKIN       | 2.0635  |
| CSNK1A1 | RANBP2  | S781  | NetworKIN       | 1.72538 |
| CSNK1A1 | RANBP2  | T1396 | NetworKIN       | 1.59812 |
| CSNK1A1 | RANBP2  | T799  | NetworKIN       | 1.66902 |
| CSNK1D  | CLIP1   | S204  | NetworKIN       | 1.01096 |
| CSNK1D  | CLIP2   | S207  | NetworKIN       | 1.1388  |
| CSNK1D  | BLOC1S3 | S65   | NetworKIN       | 0.96296 |
| CSNK1D  | CLSPN   | S83   | NetworKIN       | 2.27774 |
| CSNK1D  | DCK     | T72   | PhosphoSitePlus | 0.86846 |
| CSNK1E  | AXIN1   | S486  | NetworKIN       | 2.0635  |
| CSNK1G1 | DIDO1   | S152  | NetworKIN       | 1.25872 |
| CSNK1G1 | AXIN1   | S486  | NetworKIN       | 2.0635  |
| CSNK1G1 | DIDO1   | S805  | NetworKIN       | 1.27503 |
| CSNK1G1 | DIDO1   | S809  | NetworKIN       | 0.94361 |
| CSNK1G2 | TOP2A   | S1106 | NetworKIN       | 2.10765 |
| CSNK1G2 | TOP2A   | S1247 | NetworKIN       | 2.44481 |
| CSNK1G2 | AXIN1   | S486  | NetworKIN       | 2.0635  |
| CSNK2A1 | TP53BP1 | S1073 | NetworKIN       | 1.93093 |
| CSNK2A1 | TOP2A   | S1106 | NetworKIN       | 2.10765 |
| CSNK2A1 | EIF5B   | S113  | NetworKIN       | 1.40389 |
| CSNK2A1 | SUB1    | S118  | NetworKIN       | 0.9392  |
| CSNK2A1 | TOP2A   | S1247 | NetworKIN       | 2.44481 |
| CSNK2A1 | RSF1    | S1282 | NetworKIN       | 1.76087 |
| CSNK2A1 | RSF1    | S1310 | NetworKIN       | 1.59464 |
| CSNK2A1 | ATRX    | S1352 | NetworKIN       | 1.31504 |
| CSNK2A1 | LIG1    | S141  | NetworKIN       | 1.05089 |
| CSNK2A1 | SUB1    | S15   | NetworKIN       | 1.33994 |

|         |          |       |                 |         |
|---------|----------|-------|-----------------|---------|
| CSNK2A1 | SUB1     | S19   | NetworKIN       | 1.68987 |
| CSNK2A1 | MYO18A   | S2043 | NetworKIN       | 1.01456 |
| CSNK2A1 | SPP1     | S219  | NetworKIN       | 1.62338 |
| CSNK2A1 | SPP1     | S254  | NetworKIN       | 2.28836 |
| CSNK2A1 | SPP1     | S258  | NetworKIN       | 2.05269 |
| CSNK2A1 | BRD7     | S279  | NetworKIN       | 1.14635 |
| CSNK2A1 | AATF     | S321  | NetworKIN       | 1.4587  |
| CSNK2A1 | NCL      | S34   | NetworKIN       | 1.48753 |
|         |          |       |                 | -       |
| CSNK2A1 | CAV1     | S37   | NetworKIN       | 2.23897 |
| CSNK2A1 | HSP90AA1 | S385  | NetworKIN       | 1.11314 |
| CSNK2A1 | NCL      | S41   | NetworKIN       | 1.31122 |
| CSNK2A1 | NCL      | S42   | NetworKIN       | 1.31122 |
| CSNK2A1 | IWS1     | S422  | NetworKIN       | 2.21232 |
| CSNK2A1 | SSRP1    | S444  | NetworKIN       | 1.35103 |
| CSNK2A1 | IWS1     | S513  | NetworKIN       | 1.47573 |
| CSNK2A1 | SUDS3    | S53   | NetworKIN       | 1.49624 |
| CSNK2A1 | PRPF3    | S619  | NetworKIN       | 1.34078 |
| CSNK2A1 | PDAP1    | S63   | NetworKIN       | 1.37657 |
| CSNK2A1 | KIF1C    | S676  | NetworKIN       | 1.13621 |
| CSNK2A1 | ST13     | S75   | NetworKIN       | 1.32411 |
| CSNK2A1 | CLSPN    | S83   | NetworKIN       | 2.27774 |
| CSNK2A1 | SUDS3    | T49   | NetworKIN       | 1.20743 |
| CSNK2A1 | ABCF1    | S109  | PhosphoSitePlus | 1.29626 |
| CSNK2A1 | MCM2     | S139  | PhosphoSitePlus | 1.42615 |
| CSNK2A1 | HSP90AB1 | S226  | PhosphoSitePlus | 1.50592 |
| CSNK2A1 | HDAC1    | S421  | PhosphoSitePlus | 1.4713  |
| CSNK2A1 | HDAC1    | S423  | PhosphoSitePlus | 1.5148  |
| CSNK2A1 | NCAPG    | S975  | PhosphoSitePlus | 2.02109 |
| CSNK2A2 | SPP1     | S219  | NetworKIN       | 1.62338 |
| CSNK2A2 | SPP1     | S234  | NetworKIN       | 2.04894 |
| CSNK2A2 | SPP1     | S254  | NetworKIN       | 2.28836 |
| CSNK2A2 | SPP1     | S258  | NetworKIN       | 2.05269 |
| CSNK2A2 | SPP1     | S263  | NetworKIN       | 2.5022  |
| CSNK2A2 | SPP1     | S267  | NetworKIN       | 2.53247 |
| CSNK2A2 | NCL      | S34   | NetworKIN       | 1.48753 |
|         |          |       |                 | -       |
| CSNK2A2 | CAV1     | S37   | NetworKIN       | 2.23897 |
| CSNK2A2 | HSP90AA1 | S385  | NetworKIN       | 1.11314 |
| CSNK2A2 | NCL      | S41   | NetworKIN       | 1.31122 |
| CSNK2A2 | NCL      | S42   | NetworKIN       | 1.31122 |
| CSNK2A2 | HDAC1    | S421  | NetworKIN       | 1.4713  |
| CSNK2A2 | HDAC1    | S423  | NetworKIN       | 1.5148  |
| CSNK2A2 | SSRP1    | S444  | NetworKIN       | 1.35103 |
| CSNK2A2 | KIF1C    | S676  | NetworKIN       | 1.13621 |
| CSNK2A2 | XRCC1    | T453  | NetworKIN       | 1.74251 |
| DAPK1   | RB1      | T373  | NetworKIN       | 1.47486 |

|         |          |      |                 |         |
|---------|----------|------|-----------------|---------|
| DYRK2   | CARHSP1  | S30  | PhosphoSitePlus | 1.16146 |
| DYRK2   | CARHSP1  | S32  | PhosphoSitePlus | 1.131   |
|         |          |      |                 | -       |
| EGFR    | CAV1     | Y42  | NetworKIN       | 1.49196 |
| EIF2AK2 | IFIH1    | S301 | NetworKIN       | 1.49612 |
| EIF2AK2 | HSP90AA1 | S385 | NetworKIN       | 1.11314 |
|         |          |      |                 | -       |
| ERBB2   | CAV1     | Y42  | NetworKIN       | 1.49196 |
|         |          |      |                 | -       |
| FGR     | CAV1     | Y42  | NetworKIN       | 1.49196 |
|         |          |      |                 | -       |
| FYN     | CAV1     | Y42  | NetworKIN       | 1.49196 |
|         |          |      |                 | -       |
| GRK1    | CAV1     | S37  | NetworKIN       | 2.23897 |
|         |          |      |                 | -       |
| GRK5    | CAV1     | S37  | NetworKIN       | 2.23897 |
| GSK3A   | HSF1     | S307 | NetworKIN       | 1.23979 |
| GSK3A   | AXIN1    | S486 | NetworKIN       | 2.0635  |
| GSK3A   | AXIN1    | S493 | NetworKIN       | 2.10376 |
| GSK3A   | SEC31A   | S799 | NetworKIN       | 1.42551 |
| GSK3A   | EIF4EBP1 | T70  | NetworKIN       | 1.16322 |
| GSK3B   | CLIP2    | S207 | NetworKIN       | 1.1388  |
| GSK3B   | HSF1     | S307 | NetworKIN       | 1.23979 |
| GSK3B   | ACBD3    | S43  | NetworKIN       | 1.31631 |
| GSK3B   | ACLY     | S481 | NetworKIN       | 0.89944 |
| GSK3B   | AXIN1    | S486 | NetworKIN       | 2.0635  |
| GSK3B   | AXIN1    | S493 | NetworKIN       | 2.10376 |
| GSK3B   | EIF4EBP1 | T70  | NetworKIN       | 1.16322 |
| HIPK1   | PML      | S403 | NetworKIN       | 1.42702 |
| HIPK1   | PML      | T409 | NetworKIN       | 1.4118  |
| HIPK2   | SUB1     | S118 | NetworKIN       | 0.9392  |
| HIPK2   | MCM4     | S120 | NetworKIN       | 1.89214 |
|         |          |      |                 | -       |
| HIPK2   | CAV1     | S37  | NetworKIN       | 2.23897 |
| HIPK2   | PML      | S403 | NetworKIN       | 1.42702 |
| HIPK2   | RANGAP1  | S442 | NetworKIN       | 2.07844 |
| HIPK2   | AXIN1    | S486 | NetworKIN       | 2.0635  |
| HIPK2   | RANBP2   | S781 | NetworKIN       | 1.72538 |
| HIPK2   | RB1      | S807 | NetworKIN       | 1.60762 |
| HIPK2   | VPS4A    | S95  | NetworKIN       | 1.06374 |
| HIPK2   | NCL      | T76  | NetworKIN       | 2.02747 |
| HIPK2   | HMGA1    | S36  | PhosphoSitePlus | 1.28941 |
| HIPK2   | HMGA1    | T53  | PhosphoSitePlus | 1.89968 |
| IKBKB   | SQSTM1   | S24  | NetworKIN       | 1.0846  |
| IKBKB   | SQSTM1   | S272 | NetworKIN       | 1.31807 |
| IKBKB   | HSP90AA1 | S385 | NetworKIN       | 1.11314 |
|         |          |      |                 | -       |
| INSR    | CAV1     | Y42  | NetworKIN       | 1.49196 |



|        |          |       |                 |         |
|--------|----------|-------|-----------------|---------|
| KDR    | CAV1     | Y42   | NetworKIN       | 1.49196 |
| MAP2K1 | EIF4EBP1 | T70   | NetworKIN       | 1.16322 |
| MAP3K8 | CDK1     | T161  | PhosphoSitePlus | 1.22206 |
| MAP3K8 | EIF4EBP1 | T70   | PhosphoSitePlus | 1.16322 |
| MAPK1  | MARCKS   | S145  | NetworKIN       | 1.32334 |
| MAPK1  | TPR      | S1676 | NetworKIN       | 2.12743 |
| MAPK1  | ETV6     | S22   | NetworKIN       | 1.14926 |
| MAPK1  | RB1      | S249  | NetworKIN       | 1.32839 |
| MAPK1  | AXIN1    | S486  | NetworKIN       | 2.0635  |
| MAPK1  | RB1      | S807  | NetworKIN       | 1.60762 |
| MAPK1  | MARCKS   | T150  | NetworKIN       | 1.05804 |
| MAPK1  | RB1      | T373  | NetworKIN       | 1.47486 |
| MAPK1  | HUWE1    | T3924 | NetworKIN       | 1.12847 |
| MAPK1  | GORASP2  | T415  | NetworKIN       | 1.02916 |
| MAPK1  | DDX20    | T705  | NetworKIN       | 1.19313 |
| MAPK1  | RANBP2   | T799  | NetworKIN       | 1.66902 |
| MAPK1  | TOP2A    | S1247 | PhosphoSitePlus | 2.44481 |
| MAPK1  | TOP2A    | S1393 | PhosphoSitePlus | 2.02465 |
| MAPK1  | ABI1     | S183  | PhosphoSitePlus | 0.84985 |
| MAPK1  | PGK1     | S203  | PhosphoSitePlus | 1.67388 |
| MAPK1  | HNRNPK   | S284  | PhosphoSitePlus | 1.22544 |
| MAPK1  | CTTN     | S418  | PhosphoSitePlus | 1.15428 |
| MAPK1  | EIF4EBP1 | T70   | PhosphoSitePlus | 1.16322 |
| MAPK1  | RBM17    | T71   | PhosphoSitePlus | 1.3646  |
| MAPK11 | PML      | S403  | NetworKIN       | 1.42702 |
| MAPK11 | PML      | T409  | NetworKIN       | 1.4118  |
| MAPK12 | DIDO1    | S805  | NetworKIN       | 1.27503 |
| MAPK13 | EIF4EBP1 | T70   | NetworKIN       | 1.16322 |
| MAPK13 | SQSTM1   | S272  | PhosphoSitePlus | 1.31807 |
| MAPK14 | ETV6     | S22   | PhosphoSitePlus | 1.14926 |
| MAPK3  | PAK4     | S104  | NetworKIN       | 0.94463 |
| MAPK3  | TERF2IP  | S154  | NetworKIN       | 1.23622 |
| MAPK3  | ETV6     | S22   | NetworKIN       | 1.14926 |
| MAPK3  | SQSTM1   | S272  | NetworKIN       | 1.31807 |
|        |          |       |                 | -       |
| MAPK3  | DES      | S32   | NetworKIN       | 1.81277 |
| MAPK3  | AXIN1    | S486  | NetworKIN       | 2.0635  |
| MAPK3  | AXIN1    | S493  | NetworKIN       | 2.10376 |
| MAPK3  | CD2AP    | S510  | NetworKIN       | 1.94251 |
| MAPK3  | CD2AP    | S514  | NetworKIN       | 1.58184 |
| MAPK3  | ANAPC1   | S688  | NetworKIN       | 1.28971 |
| MAPK3  | RB1      | S807  | NetworKIN       | 1.60762 |
| MAPK3  | CHD4     | T1542 | NetworKIN       | 1.11205 |
| MAPK3  | RB1      | T373  | NetworKIN       | 1.47486 |
| MAPK3  | HUWE1    | T3924 | NetworKIN       | 1.12847 |
| MAPK3  | EIF4EBP1 | T70   | NetworKIN       | 1.16322 |

|       |          |       |                 |         |
|-------|----------|-------|-----------------|---------|
| MAPK3 | SGTA     | T81   | NetworKIN       | 1.12051 |
| MAPK3 | TOP2A    | S1247 | PhosphoSitePlus | 2.44481 |
| MAPK3 | TOP2A    | S1393 | PhosphoSitePlus | 2.02465 |
| MAPK3 | ABI1     | S183  | PhosphoSitePlus | 0.84985 |
| MAPK3 | HNRNPK   | S284  | PhosphoSitePlus | 1.22544 |
| MAPK3 | HSF1     | S307  | PhosphoSitePlus | 1.23979 |
| MAPK3 | CTTN     | S418  | PhosphoSitePlus | 1.15428 |
| MAPK7 | TERF2IP  | S154  | NetworKIN       | 1.23622 |
| MAPK7 | PML      | S403  | PhosphoSitePlus | 1.42702 |
| MAPK7 | PML      | T409  | PhosphoSitePlus | 1.4118  |
| MAPK8 | RB1      | S249  | NetworKIN       | 1.32839 |
| MAPK8 | HSF1     | S307  | NetworKIN       | 1.23979 |
| MAPK8 | AXIN1    | S486  | NetworKIN       | 2.0635  |
| MAPK8 | AXIN1    | S493  | NetworKIN       | 2.10376 |
| MAPK8 | RB1      | S807  | NetworKIN       | 1.60762 |
| MAPK9 | RB1      | S249  | NetworKIN       | 1.32839 |
| MAPK9 | RB1      | S807  | NetworKIN       | 1.60762 |
| MARK3 | PKP2     | S155  | NetworKIN       | 1.14792 |
| MARK3 | AXIN1    | S493  | NetworKIN       | 2.10376 |
| MARK4 | MYO18A   | S2041 | NetworKIN       | 0.96562 |
| MARK4 | MYO18A   | S2043 | NetworKIN       | 1.01456 |
| MTOR  | SRRM2    | S1326 | PhosphoSitePlus | 1.46519 |
| MTOR  | SRRM2    | S1329 | PhosphoSitePlus | 1.51865 |
| MTOR  | DAP      | S51   | PhosphoSitePlus | 1.52547 |
| MTOR  | DNMT1    | S714  | PhosphoSitePlus | 1.4996  |
| MTOR  | EIF4EBP1 | T70   | PhosphoSitePlus | 1.16322 |
| NEK1  | VDAC1    | S104  | NetworKIN       | 1.7176  |
| NEK2  | TOP2A    | S1106 | NetworKIN       | 2.10765 |
| NEK2  | MKI67    | S1131 | NetworKIN       | 1.79269 |
| NEK2  | TOP2A    | S1247 | NetworKIN       | 2.44481 |
| NEK2  | TOP2A    | S1393 | NetworKIN       | 2.02465 |
| NEK2  | TPR      | S1676 | NetworKIN       | 2.12743 |
| NEK2  | CLIP1    | S204  | NetworKIN       | 1.01096 |
| NEK2  | CDCA8    | S219  | NetworKIN       | 1.78881 |
| NEK2  | MKI67    | S2223 | NetworKIN       | 1.8256  |
| NEK2  | INCENP   | S263  | NetworKIN       | 1.16519 |
| NEK2  | ANAPC2   | S314  | NetworKIN       | 1.48343 |
| NEK2  | MKI67    | S357  | NetworKIN       | 1.69444 |
| NEK2  | MKI67    | S374  | NetworKIN       | 2.27461 |
| NEK2  | CDC20    | S41   | NetworKIN       | 1.57018 |
| NEK2  | ASPM     | S425  | NetworKIN       | 1.53023 |
| NEK2  | RANGAP1  | S442  | NetworKIN       | 2.07844 |
| NEK2  | PBK      | S59   | NetworKIN       | 1.90205 |
| NEK2  | NCAPG    | S674  | NetworKIN       | 1.94288 |
| NEK2  | ANAPC1   | S688  | NetworKIN       | 1.28971 |
| NEK2  | NCAPG    | S975  | NetworKIN       | 2.02109 |

|        |          |       |                 |         |
|--------|----------|-------|-----------------|---------|
| NEK2   | MKI67    | T1923 | NetworKIN       | 1.4364  |
| PAK1   | GIT2     | S394  | NetworKIN       | 1.65423 |
| PAK1   | CTTN     | S418  | PhosphoSitePlus | 1.15428 |
| PAK2   | MYO18A   | S2041 | NetworKIN       | 0.96562 |
| PAK3   | GIT2     | S394  | NetworKIN       | 1.65423 |
| PAK4   | PAK4     | S104  | NetworKIN       | 0.94463 |
| PDK1   | HSP90AA1 | S385  | NetworKIN       | 1.11314 |
| PIM1   | CBX3     | S97   | NetworKIN       | 1.32785 |
| PKD1   | OSBP     | S389  | NetworKIN       | 1.32172 |
| PKD1   | SLC9A1   | S605  | NetworKIN       | 1.26777 |
| PKD1   | CFL1     | T25   | NetworKIN       | 1.26505 |
| PKM    | AKT1S1   | S203  | PhosphoSitePlus | 1.08363 |
| PLK1   | TP53BP1  | S1072 | NetworKIN       | 1.70646 |
| PLK1   | TP53BP1  | S1073 | NetworKIN       | 1.93093 |
| PLK1   | MCM2     | S139  | NetworKIN       | 1.42615 |
| PLK1   | TP53BP1  | S1431 | NetworKIN       | 1.15094 |
| PLK1   | TP53BP1  | S1623 | NetworKIN       | 1.27193 |
| PLK1   | TP53BP1  | S1683 | NetworKIN       | 2.41735 |
| PLK1   | CLIP1    | S204  | NetworKIN       | 1.01096 |
| PLK1   | CDCA8    | S219  | NetworKIN       | 1.78881 |
| PLK1   | TP53BP1  | S530  | NetworKIN       | 1.07132 |
| PLK1   | TP53BP1  | S644  | NetworKIN       | 1.15098 |
| PLK1   | TP53BP1  | S645  | NetworKIN       | 0.95277 |
| PLK1   | CLSPN    | S83   | NetworKIN       | 2.27774 |
| PLK1   | TP53BP1  | S836  | NetworKIN       | 1.1972  |
| PLK1   | TP53BP1  | S839  | NetworKIN       | 1.43801 |
| PLK1   | NUDC     | T145  | NetworKIN       | 1.66862 |
| PLK1   | HNRNPU   | S59   | PhosphoSitePlus | 1.4917  |
| PLK1   | ANAPC1   | S688  | PhosphoSitePlus | 1.28971 |
| PLK4   | TOP2A    | S1106 | NetworKIN       | 2.10765 |
| PLK4   | TOP2A    | S1247 | NetworKIN       | 2.44481 |
| PLK4   | PBK      | S59   | NetworKIN       | 1.90205 |
| PLK4   | NCAPG    | S674  | NetworKIN       | 1.94288 |
| PLK4   | NCAPG    | S975  | NetworKIN       | 2.02109 |
| PRKAA1 | PRKAB1   | S96   | NetworKIN       | 1.17051 |
| PRKAA2 | CRTC2    | S613  | NetworKIN       | 1.14025 |
| PRKAA2 | PRKAB1   | S96   | NetworKIN       | 1.17051 |
| PRKACB | ITPR3    | S2670 | NetworKIN       | 0.95805 |
| PRKACG | ITPR3    | S2670 | NetworKIN       | 0.95805 |
| PRKCA  | CLIP1    | S204  | NetworKIN       | 1.01096 |
| PRKCA  | ITPR3    | S2670 | NetworKIN       | 0.95805 |
| PRKCA  | CAV1     | S37   | NetworKIN       | 2.23897 |
| PRKCA  | MARCKS   | T150  | NetworKIN       | 1.05804 |
| PRKCB  | PPP1R13L | S134  | NetworKIN       | 1.04302 |
| PRKCB  | SRRM2    | S1948 | NetworKIN       | 1.75443 |
| PRKCB  | SRRM2    | S1960 | NetworKIN       | 1.75443 |

|       |         |       |                 |         |
|-------|---------|-------|-----------------|---------|
| PRKCB | CLIP1   | S204  | NetworKIN       | 1.01096 |
| PRKCB | ZC3HAV1 | S280  | NetworKIN       | 1.12906 |
| PRKCB | NCOA5   | S34   | NetworKIN       | 0.98535 |
| PRKCB | PRKAB1  | S96   | NetworKIN       | 1.17051 |
| PRKCB | CARHSP1 | T45   | NetworKIN       | 1.41489 |
| PRKCB | EEF2    | T59   | NetworKIN       | 1.40194 |
| PRKCD | MARCKS  | T150  | NetworKIN       | 1.05804 |
|       |         |       |                 | -       |
| PRKCE | CAV1    | S37   | NetworKIN       | 2.23897 |
| PRKCE | MARCKS  | T150  | NetworKIN       | 1.05804 |
| PRKCG | ITPR3   | S2670 | NetworKIN       | 0.95805 |
| PRKCG | MARCKS  | T150  | NetworKIN       | 1.05804 |
| PRKCI | SQSTM1  | S24   | NetworKIN       | 1.0846  |
| PRKCZ | SQSTM1  | S24   | NetworKIN       | 1.0846  |
| PRKCZ | MARCKS  | T150  | NetworKIN       | 1.05804 |
| PRKDC | TP53BP1 | S1033 | NetworKIN       | 1.15002 |
| PRKDC | TP53BP1 | S1073 | NetworKIN       | 1.93093 |
| PRKDC | TP53BP1 | S1099 | NetworKIN       | 1.42362 |
| PRKDC | TP53BP1 | S1106 | NetworKIN       | 1.47492 |
| PRKDC | SUB1    | S118  | NetworKIN       | 0.9392  |
| PRKDC | MCM4    | S120  | NetworKIN       | 1.89214 |
| PRKDC | TP53BP1 | S1431 | NetworKIN       | 1.15094 |
| PRKDC | SUB1    | S15   | NetworKIN       | 1.33994 |
| PRKDC | TP53BP1 | S1623 | NetworKIN       | 1.27193 |
| PRKDC | SUB1    | S19   | NetworKIN       | 1.68987 |
| PRKDC | XRCC1   | S241  | NetworKIN       | 2.4465  |
| PRKDC | HSF1    | S307  | NetworKIN       | 1.23979 |
| PRKDC | XRCC1   | S447  | NetworKIN       | 1.78105 |
| PRKDC | TP53BP1 | S530  | NetworKIN       | 1.07132 |
| PRKDC | TP53BP1 | S644  | NetworKIN       | 1.15098 |
| PRKDC | TP53BP1 | S645  | NetworKIN       | 0.95277 |
| PRKDC | TP53BP1 | S836  | NetworKIN       | 1.1972  |
| PRKDC | TP53BP1 | S839  | NetworKIN       | 1.43801 |
| PRKDC | HNRNPU  | S59   | PhosphoSitePlus | 1.4917  |
| PRKG1 | PGK1    | S203  | NetworKIN       | 1.67388 |
| PRKG1 | SPP1    | S219  | NetworKIN       | 1.62338 |
| PRKG1 | SPP1    | S234  | NetworKIN       | 2.04894 |
| PRKG1 | SPP1    | S254  | NetworKIN       | 2.28836 |
| PRKG1 | SPP1    | S258  | NetworKIN       | 2.05269 |
| PRKG1 | SPP1    | S263  | NetworKIN       | 2.5022  |
| PRKG1 | SPP1    | S267  | NetworKIN       | 2.53247 |
| PRKG1 | ITPR3   | S2670 | NetworKIN       | 0.95805 |
| PRKG1 | BLOC1S3 | S65   | NetworKIN       | 0.96296 |
| PRKG2 | ITPR3   | S2670 | NetworKIN       | 0.95805 |
| PRKG2 | BLOC1S3 | S65   | NetworKIN       | 0.96296 |
| RAF1  | PAK4    | S104  | NetworKIN       | 0.94463 |
| RAF1  | VDAC1   | S104  | NetworKIN       | 1.7176  |

|         |          |       |                 |         |
|---------|----------|-------|-----------------|---------|
| RAF1    | TERF2IP  | S154  | NetworKIN       | 1.23622 |
| RAF1    | HSP90AB1 | S226  | NetworKIN       | 1.50592 |
| RAF1    | RB1      | S249  | NetworKIN       | 1.32839 |
| RAF1    | HSP90AA1 | S385  | NetworKIN       | 1.11314 |
| RAF1    | PBK      | S59   | NetworKIN       | 1.90205 |
| RAF1    | RB1      | S807  | NetworKIN       | 1.60762 |
| ROCK1   | RTKN     | S106  | NetworKIN       | 1.35638 |
|         |          |       |                 | -       |
| ROCK1   | DES      | S32   | NetworKIN       | 1.81277 |
| ROCK1   | RTKN     | S543  | NetworKIN       | 1.35739 |
| ROCK1   | SLC9A1   | S605  | NetworKIN       | 1.26777 |
| ROCK1   | CFL1     | T25   | NetworKIN       | 1.26505 |
| ROCK2   | RTKN     | S106  | NetworKIN       | 1.35638 |
| RPS6KA2 | YBX1     | S165  | NetworKIN       | 1.37003 |
| RPS6KA2 | YBX1     | S174  | NetworKIN       | 1.2611  |
| RPS6KA2 | CARHSP1  | S30   | NetworKIN       | 1.16146 |
| RPS6KA2 | CARHSP1  | S32   | NetworKIN       | 1.131   |
| RPS6KA2 | CARHSP1  | T45   | NetworKIN       | 1.41489 |
| RPS6KA2 | EIF4EBP1 | T70   | NetworKIN       | 1.16322 |
|         |          |       |                 | -       |
| SRC     | CAV1     | Y42   | NetworKIN       | 1.49196 |
| STK11   | SGTA     | T81   | NetworKIN       | 1.12051 |
| STK39   | SLC12A7  | T973  | PhosphoSitePlus | 0.96572 |
|         |          |       |                 | -       |
| TGFBR2  | CAV1     | S37   | NetworKIN       | 2.23897 |
| TGFBR2  | HSP90AA1 | S385  | NetworKIN       | 1.11314 |
| TTK     | MKI67    | S374  | NetworKIN       | 2.27461 |
| TTK     | RSF1     | T1371 | NetworKIN       | 1.46563 |
| TTK     | NUCKS1   | T179  | NetworKIN       | 1.1932  |
| TTK     | MKI67    | T1923 | NetworKIN       | 1.4364  |
| TTK     | RACGAP1  | T342  | NetworKIN       | 1.4927  |
| TTK     | RSF1     | T628  | NetworKIN       | 1.04594 |
| TTK     | EIF4EBP1 | T70   | NetworKIN       | 1.16322 |

Table S5: Kinase enrichment score from KSEA analysis

| Kinase.Gene | mS       | Enrichment  | m | z.score  | p.value  | FDR      |
|-------------|----------|-------------|---|----------|----------|----------|
| ADRBK1      | 0.295517 | 0.220374816 | 3 | -3.537   | 0.000202 | 0.001303 |
| ADRBK2      | 1.113138 | 0.830096642 | 1 | -0.44503 | 0.328148 | 0.453172 |
| AKT1        | 1.279915 | 0.954467009 | 6 | -0.29214 | 0.38509  | 0.460769 |
| AKT2        | 1.14025  | 0.850315061 | 1 | -0.39207 | 0.347502 | 0.453172 |
| ARAF        | 1.902048 | 1.418408172 | 1 | 1.095946 | 0.136551 | 0.426205 |
| ATM         | 1.383314 | 1.031574341 | 3 | 0.143246 | 0.443048 | 0.465652 |
| ATR         | 1.564068 | 1.166367507 | 2 | 0.616272 | 0.268857 | 0.453172 |

|          |          |              |    |          |          |          |
|----------|----------|--------------|----|----------|----------|----------|
| AURKA    | 1.720302 | 1.282875442  | 18 | 3.143551 | 0.000835 | 0.004776 |
| AURKB    | 1.909665 | 1.424087903  | 5  | 2.483876 | 0.006498 | 0.027887 |
| AURKC    | 1.165187 | 0.868911153  | 1  | -0.34336 | 0.365662 | 0.453172 |
| BMX      | -1.49196 | -1.112595154 | 1  | -5.53357 | 1.57E-08 | 1.47E-07 |
| BTK      | -1.49196 | -1.112595154 | 1  | -5.53357 | 1.57E-08 | 1.47E-07 |
| BUB1     | 1.570181 | 1.170925806  | 1  | 0.44771  | 0.327181 | 0.453172 |
| CAMK2A   | 1.786289 | 1.33208301   | 1  | 0.869833 | 0.192196 | 0.453172 |
| CAMK4    | 1.515585 | 1.130212032  | 2  | 0.482342 | 0.314781 | 0.453172 |
| CDC42BPA | 0.990093 | 0.738338841  | 2  | -0.96927 | 0.166206 | 0.450506 |
| CDC42BPB | 0.990093 | 0.738338841  | 2  | -0.96927 | 0.166206 | 0.450506 |
| CDC7     | 1.426154 | 1.063520806  | 1  | 0.166382 | 0.433928 | 0.460769 |
| CDK1     | 1.495789 | 1.115449576  | 73 | 2.583704 | 0.004887 | 0.021886 |
| CDK2     | 1.583902 | 1.181157796  | 31 | 2.641964 | 0.004121 | 0.019295 |
| CDK3     | 1.607621 | 1.198845496  | 1  | 0.520841 | 0.301239 | 0.453172 |
| CDK4     | 1.618984 | 1.207319172  | 6  | 1.330161 | 0.091733 | 0.337445 |
| CDK5     | 1.383153 | 1.03145377   | 9  | 0.247163 | 0.402391 | 0.460769 |
| CDK6     | 1.561213 | 1.164237936  | 2  | 0.608384 | 0.271467 | 0.453172 |
| CDK7     | 1.177903 | 0.878393492  | 6  | -0.78023 | 0.217628 | 0.453172 |
| CDK9     | 1.607621 | 1.198845496  | 1  | 0.520841 | 0.301239 | 0.453172 |
| CHEK1    | 1.556607 | 1.160803042  | 2  | 0.59566  | 0.275701 | 0.453172 |
| CHUK     | 1.171936 | 0.873944053  | 3  | -0.57189 | 0.283698 | 0.453172 |
| CLK1     | 1.490059 | 1.111176607  | 20 | 1.302319 | 0.096404 | 0.342399 |
| CLK2     | 1.386084 | 1.033639846  | 4  | 0.176227 | 0.430058 | 0.460769 |
| CLK3     | 1.107453 | 0.825857558  | 2  | -0.64507 | 0.25944  | 0.453172 |
| CSNK1A1  | 1.681411 | 1.253873231  | 5  | 1.486932 | 0.068516 | 0.282288 |
| CSNK1D   | 1.251783 | 0.933487813  | 5  | -0.38956 | 0.348431 | 0.453172 |
| CSNK1E   | 2.063504 | 1.538809821  | 1  | 1.411317 | 0.079076 | 0.301659 |
| CSNK1G1  | 1.385214 | 1.032990831  | 4  | 0.172827 | 0.431394 | 0.460769 |
| CSNK1G2  | 2.205322 | 1.6445674    | 3  | 2.924274 | 0.001726 | 0.00889  |
| CSNK2A1  | 1.436305 | 1.071090659  | 38 | 1.147872 | 0.125511 | 0.41702  |
| CSNK2A2  | 1.453001 | 1.083541469  | 16 | 0.875288 | 0.190709 | 0.453172 |
| DAPK1    | 1.474865 | 1.099846117  | 1  | 0.261529 | 0.396842 | 0.460769 |
| DYRK2    | 1.14623  | 0.854774581  | 2  | -0.53796 | 0.295304 | 0.453172 |
| EGFR     | -1.49196 | -1.112595154 | 1  | -5.53357 | 1.57E-08 | 1.47E-07 |
| EIF2AK2  | 1.304631 | 0.972897977  | 2  | -0.10039 | 0.460016 | 0.473816 |
| ERBB2    | -1.49196 | -1.112595154 | 1  | -5.53357 | 1.57E-08 | 1.47E-07 |
| FGR      | -1.49196 | -1.112595154 | 1  | -5.53357 | 1.57E-08 | 1.47E-07 |
| FYN      | -1.49196 | -1.112595154 | 1  | -5.53357 | 1.57E-08 | 1.47E-07 |
| GRK1     | -2.23897 | -1.669662118 | 1  | -6.99271 | 1.35E-12 | 6.94E-11 |
| GRK5     | -2.23897 | -1.669662118 | 1  | -6.99271 | 1.35E-12 | 6.94E-11 |
| GSK3A    | 1.599159 | 1.192535265  | 5  | 1.127676 | 0.129728 | 0.417563 |
| GSK3B    | 1.417834 | 1.057316517  | 7  | 0.397208 | 0.345607 | 0.453172 |
| HIPK1    | 1.41941  | 1.058491699  | 2  | 0.21667  | 0.414233 | 0.460769 |
| HIPK2    | 1.314554 | 0.980297884  | 12 | -0.17877 | 0.429059 | 0.460769 |
| IKKB     | 1.171936 | 0.873944053  | 3  | -0.57189 | 0.283698 | 0.453172 |
| INSR     | -1.49196 | -1.112595154 | 1  | -5.53357 | 1.57E-08 | 1.47E-07 |

|         |          |              |    |          |          |          |
|---------|----------|--------------|----|----------|----------|----------|
| KDR     | -1.49196 | -1.112595154 | 1  | -5.53357 | 1.57E-08 | 1.47E-07 |
| MAP2K1  | 1.163223 | 0.867446581  | 1  | -0.3472  | 0.36422  | 0.453172 |
| MAP3K8  | 1.19264  | 0.889383762  | 2  | -0.40975 | 0.340993 | 0.453172 |
| MAPK1   | 1.452649 | 1.083278944  | 20 | 0.975527 | 0.164649 | 0.450506 |
| MAPK11  | 1.41941  | 1.058491699  | 2  | 0.21667  | 0.414233 | 0.460769 |
| MAPK12  | 1.275026 | 0.950820527  | 1  | -0.12882 | 0.448751 | 0.466883 |
| MAPK13  | 1.240646 | 0.925182765  | 2  | -0.27714 | 0.390835 | 0.460769 |
| MAPK14  | 1.149262 | 0.857035206  | 1  | -0.37447 | 0.354027 | 0.453172 |
| MAPK3   | 1.289196 | 0.961387589  | 22 | -0.47438 | 0.317614 | 0.453172 |
| MAPK7   | 1.358346 | 1.012954745  | 3  | 0.058773 | 0.476566 | 0.486003 |
| MAPK8   | 1.668613 | 1.244329149  | 5  | 1.431032 | 0.076211 | 0.301659 |
| MAPK9   | 1.468003 | 1.094729093  | 2  | 0.350903 | 0.36283  | 0.453172 |
| MARK3   | 1.625841 | 1.212432744  | 2  | 0.786911 | 0.215667 | 0.453172 |
| MARK4   | 0.990093 | 0.738338841  | 2  | -0.96927 | 0.166206 | 0.450506 |
| MTOR    | 1.434425 | 1.069688685  | 5  | 0.408166 | 0.341576 | 0.453172 |
| NEK1    | 1.717597 | 1.280857859  | 1  | 0.735657 | 0.23097  | 0.453172 |
| NEK2    | 1.775563 | 1.324084589  | 20 | 3.796317 | 7.34E-05 | 0.000504 |
| PAK1    | 1.404252 | 1.04718829   | 2  | 0.174799 | 0.430619 | 0.460769 |
| PAK2    | 0.965625 | 0.720092211  | 1  | -0.73317 | 0.231728 | 0.453172 |
| PAK3    | 1.654225 | 1.23359982   | 1  | 0.611873 | 0.270311 | 0.453172 |
| PAK4    | 0.944628 | 0.704434222  | 1  | -0.77418 | 0.219412 | 0.453172 |
| PDK1    | 1.113138 | 0.830096642  | 1  | -0.44503 | 0.328148 | 0.453172 |
| PIM1    | 1.327853 | 0.990215183  | 1  | -0.02563 | 0.489776 | 0.489776 |
| PKD1    | 1.284846 | 0.95814408   | 3  | -0.18989 | 0.424697 | 0.460769 |
| PKM     | 1.083634 | 0.808094401  | 1  | -0.50266 | 0.307601 | 0.453172 |
| PLK1    | 1.484799 | 1.107254352  | 17 | 1.15832  | 0.123367 | 0.41702  |
| PLK4    | 2.083697 | 1.553868127  | 5  | 3.243997 | 0.000589 | 0.003571 |
| PRKAA1  | 1.170506 | 0.872877783  | 1  | -0.33297 | 0.369577 | 0.453172 |
| PRKAA2  | 1.155378 | 0.861596422  | 2  | -0.51269 | 0.304086 | 0.453172 |
| PRKACB  | 0.958051 | 0.714444052  | 1  | -0.74796 | 0.227241 | 0.453172 |
| PRKACG  | 0.958051 | 0.714444052  | 1  | -0.74796 | 0.227241 | 0.453172 |
| PRKCA   | 0.197021 | 0.146923652  | 4  | -4.46897 | 3.93E-06 | 2.89E-05 |
| PRKCB   | 1.296065 | 0.96651032   | 9  | -0.26316 | 0.396213 | 0.460769 |
| PRKCD   | 1.058043 | 0.789010921  | 1  | -0.55265 | 0.290252 | 0.453172 |
| PRKCE   | -0.59047 | -0.440325599 | 2  | -5.33537 | 4.77E-08 | 4.09E-07 |
| PRKCG   | 1.008047 | 0.751727486  | 2  | -0.91967 | 0.178872 | 0.453172 |
| PRKCI   | 1.084602 | 0.80881657   | 1  | -0.50077 | 0.308266 | 0.453172 |
| PRKCZ   | 1.071322 | 0.798913745  | 2  | -0.74488 | 0.228172 | 0.453172 |
| PRKDC   | 1.422781 | 1.061005509  | 19 | 0.696522 | 0.243051 | 0.453172 |
| PRKG1   | 1.849214 | 1.379008277  | 9  | 2.978235 | 0.00145  | 0.007858 |
| PRKG2   | 0.960504 | 0.716273083  | 2  | -1.051   | 0.146628 | 0.444197 |
| RAF1    | 1.419444 | 1.058517527  | 8  | 0.433531 | 0.332315 | 0.453172 |
| ROCK1   | 0.686762 | 0.512136923  | 5  | -2.85741 | 0.002136 | 0.010475 |
| ROCK2   | 1.35638  | 1.011489081  | 1  | 0.030094 | 0.487996 | 0.489776 |
| RPS6KA2 | 1.250284 | 0.932369881  | 6  | -0.43392 | 0.332175 | 0.453172 |
| SRC     | -1.49196 | -1.112595154 | 1  | -5.53357 | 1.57E-08 | 1.47E-07 |

|        |          |              |   |          |          |          |
|--------|----------|--------------|---|----------|----------|----------|
| STK11  | 1.120514 | 0.835596824  | 1 | -0.43063 | 0.333371 | 0.453172 |
| STK39  | 0.965721 | 0.720163914  | 1 | -0.73298 | 0.231785 | 0.453172 |
| TGFBR2 | -0.56292 | -0.419782738 | 2 | -5.25928 | 7.23E-08 | 5.73E-07 |
| TTK    | 1.438814 | 1.072961703  | 7 | 0.50563  | 0.306558 | 0.453172 |
